# Supplementary material for: Synthesis of yellow and red fluorescent 1,3a,6a-triazapentalenes and the theoretical investigation of their optical properties
Source: PubMed Central journal article supplement (PMC5811129; doi:10.1039/c4sc02780a), 2014-10-23

## Supporting Information

### Synthesis of Yellow and Red Fluorescent 1,3a,6a-Triazapentalene and Theoretical Investigation of Optical Properties.

Kosuke Namba<sup>†\*</sup>, Ayumi Osawa<sup>§</sup>, Akira Nakayama<sup>#\*</sup>, Akane Mera<sup>§</sup>, Fumi Tano<sup>§</sup>, Yoshiro Chuman<sup>‡</sup>, Eri Sakuda<sup>‡</sup>, Tetsuya Taketsugu<sup>‡</sup>, Kazuyasu Sakaguchi<sup>‡</sup>, Noboru Kitamura<sup>‡</sup> and Keiji Tanino<sup>†\*</sup>

<sup>†</sup>*Department of Pharmaceutical Science, The University of Tokushima, 1-78 Shomachi, Tokushima 770-8505, Japan*

<sup>‡</sup>*Department of Chemistry, Faculty of Science, Hokkaido University, Kita-ku, Sapporo 060-0810, Japan*

<sup>§</sup>*Graduate School of Chemical Sciences and Engineering, Hokkaido University, Sapporo 060-0810, Japan*

<sup>#</sup>*Catalysis Research Center, Hokkaido University, Sapporo 001-0021, Japan*

E-mail: [namba@mail.sci.hokudai.ac.jp](mailto:namba@mail.sci.hokudai.ac.jp); [nakayama@cat.hokudai.ac.jp](mailto:nakayama@cat.hokudai.ac.jp); and  
ktanino@sci.hokudai.ac.jp

- Experimental Detail for the Synthesis of 1,3a,6a-Triazapentalenes S2–S10
- Absorption and Fluorescence spectra of triazapentalenes S11–S15
- Molecular orbitals, natural charges, dipole moments, and Cartesian coordinates of triazapentalenes (**1a**, **1b**, **1g**, **1e**, and **1f**). S16–S28
- <sup>1</sup>H NMR and <sup>13</sup>C NMR spectra S29–S58

### **General Method and Procedure.**

All the reactions were carried out under an argon atmosphere. Tetrahydrofuran (THF) was freshly prepared by distillation from benzophenone ketyl before use. Triethylamine (TEA) was distilled from CaH<sub>2</sub> under argon atmosphere and stored over NaOH. Other anhydrous solvents and reagents were commercial grade and used as supplied.

NMR spectra were recorded on a JEOL JNM-ECA-500 (500 MHz) or a JEOL JNM-AL400 (400 MHz). Chemical shifts were reported in parts per million (ppm). For <sup>1</sup>H NMR spectra (CDCl<sub>3</sub> and CD<sub>2</sub>Cl<sub>2</sub>), tetramethylsilane and the residual solvent peak were used as the internal reference (0.00, 7.26 and 5.32 ppm), whereas the central solvent peak were used as the reference (77.0 and 39.5 ppm) for <sup>13</sup>C NMR spectra (CDCl<sub>3</sub> and DMSO-*d*<sub>6</sub>). Mass spectra were recorded on a JEOL JMS-T-100GCV (FD) a Thermo Scientific Exactive (ESI) or a Waters Micromass LCT Premier (ESI). Infrared (IR) spectra were recorded on a JASCO FT/IR-4100 or a JASCO FT/IR-4200 spectrometer using NaCl plate. Analytical thin layer chromatography (TLC) was performed with E. Merck pre-coated TLC plates, silica gel 60F-254, layer thickness 0.25 mm. Flash chromatography was performed on Kanto Chemical 60 N (0.04–0.05 mm) mesh silica gel. Absorption spectra were recorded on a Hitachi U-3300 or a JASCO V-600 spectrometer and corrected fluorescence spectra were recorded on a Hitachi F-4500 or a JASCO FP-8200 spectrofluorometer. Sample solutions were degassed thoroughly by purging with an Ar gas stream for 30 min prior to the experiments and then sealed in their cells. Fluorescence quantum yields were estimated by using 9,10-diphenylanthracene (9,10-DPA) in cyclohexane ( $\Phi_F = 0.91$ ) or rhodamine B in ethanol ( $\Phi_F = 0.94$ ) as a standard.

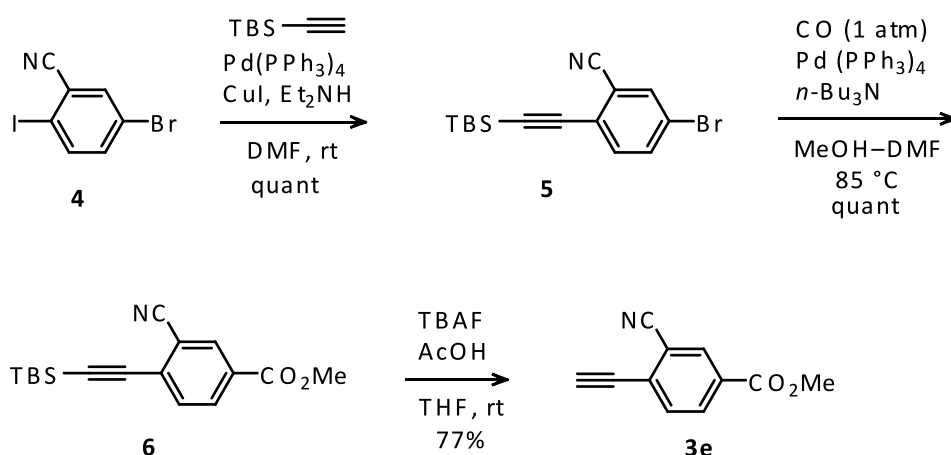

**Scheme S1.** Synthesis of **3e**

### 5-bromo-2-((*tert*-butyldimethylsilyl)ethynyl)benzonitrile (**5**)

To a solution of **4** (24.9 g, 81.0 mmol), TBS-acetylene (15.1 mL, 81.0 mmol), and Et<sub>2</sub>NH (25.1 mL, 243 mmol) in anhydrous DMF (405 mL) were added CuI (771 mg, 4.05 mmol) and Pd(PPh<sub>3</sub>)<sub>4</sub> (936 mg, 0.81 mmol) under Ar atmosphere at room temperature. After stirred for 16 h, the mixture was quenched with 1 M HCl at 0 °C and extracted with hexane (twice). The combined organic layers were washed with water and brine, dried over MgSO<sub>4</sub>, filtrated, and concentrated under reduced pressure. The residue was purified by silica-gel column chromatography to give **5** (26.5 g, quant) as a yellow solid: mp 69–72 °C; <sup>1</sup>H NMR (500 MHz, CDCl<sub>3</sub>) δ 7.75 (d, *J* = 2.0 Hz, 1H), 7.65 (dd, *J* = 8.5, 2.0 Hz, 1H), 7.42 (d, *J* = 8.0 Hz, 1H), 1.01 (s, 9H), 0.22 (s, 6H); <sup>13</sup>C NMR (125 MHz, CDCl<sub>3</sub>) δ 135.4, 135.0, 133.6, 125.8, 122.0, 117.1, 115.9, 102.2, 100.0, 25.9, 16.5, –5.0; IR (neat) 3099, 3070, 2927, 2888, 2859, 2230, 2165, 1469, 1249, 825 cm<sup>-1</sup>; HRMS (ESI) *m/z* [M+Na]<sup>+</sup> calcd for [C<sub>15</sub>H<sub>18</sub>NBrSi+Na]<sup>+</sup> 342.0284, found 342.0284.

### Methyl 4-((*tert*-butyldimethylsilyl)ethynyl)-3-cyanobenzoate (**6**)

To a solution of **5** (13.9 g, 43.5 mmol) and *n*-Bu<sub>3</sub>N (31 mL, 130 mmol) in MeOH (36 mL) and DMF (181 mL) was added Pd(PPh<sub>3</sub>)<sub>4</sub> (2.5 g, 2.18 mmol) under Ar atmosphere at room temperature. After the flask was substituted with CO gas, the reaction mixture was heated to 85 °C for 14 h. After cooled to room temperature, the mixture was quenched with 1M HCl, diluted with hexane and filtrated through Celite. The filtrate was separated and the aqueous layer was extracted with hexane (x1). The combined organic layers were washed with water and brine, dried over MgSO<sub>4</sub>, filtered, and concentrated under reduced pressure. The residue was purified by silica-gel column chromatography to give **6** (13.0 g, quant) as a yellow oil: <sup>1</sup>H NMR (500 MHz, CDCl<sub>3</sub>) δ 8.29 (d, *J* = 1.5 Hz, 1H), 8.16 (dd, *J* = 8.5, 1.5 Hz, 1H), 7.64 (d, *J* = 9.0 Hz,

1H), 3.95 (s, 3H), 1.03 (s, 9H), 0.24 (s, 6H); <sup>13</sup>C NMR (125 MHz, CDCl<sub>3</sub>) δ 164.6, 133.6, 132.9, 132.7, 130.9, 130.0, 116.5, 116.0, 104.6, 100.4, 52.7, 26.0, 16.6, -4.9; IR (neat) 3072, 3006, 2952, 2928, 2894, 2858, 2234, 2162, 1727, 1601, 1299, 1257, 828 cm<sup>-1</sup>; HRMS (ESI) m/z [M+Na]<sup>+</sup> calcd for [C<sub>17</sub>H<sub>21</sub>O<sub>2</sub>NSi+Na]<sup>+</sup> 322.1234, found 322.1233.

### Methyl 3-cyano-4-ethynylbenzoate (3e)

To a solution of **6** (12.9 g, 43.1 mmol) and acetic acid (3.0 mL, 51.7 mmol) in THF (216 mL) was added TBAF (47.4 mL, 1 M solution in THF, 47.4 mmol) at room temperature. After stirred for 5 min, the mixture was diluted with water, extracted with ether (x2). The combined organic layers were washed with brine, dried over MgSO<sub>4</sub>, filtered, and concentrated under reduced pressure. The residue was recrystallized from EtOAc to give **3e** (6.2 g, 77%) as orange crystals: mp 111–113 °C; <sup>1</sup>H NMR (500 MHz, CDCl<sub>3</sub>) δ 8.30 (d, *J* = 1.5 Hz, 1H), 8.19 (dd, *J* = 8.0, 2.0 Hz, 1H), 7.68 (d, *J* = 8.0 Hz, 1H), 3.95 (s, 3H), 3.65 (s, 1H); <sup>13</sup>C NMR (125 MHz, CDCl<sub>3</sub>) δ 164.5, 133.6, 133.1, 133.1, 130.7, 129.7, 116.3, 116.2, 86.8, 79.0, 52.8; IR (neat) 3249, 2236, 2110, 1714, 1298, 1287, 1258 cm<sup>-1</sup>; HRMS (ESI) m/z [M+H]<sup>+</sup> calcd for [C<sub>11</sub>H<sub>8</sub>NO<sub>2</sub>]<sup>+</sup> 186.0550, found 186.0552.

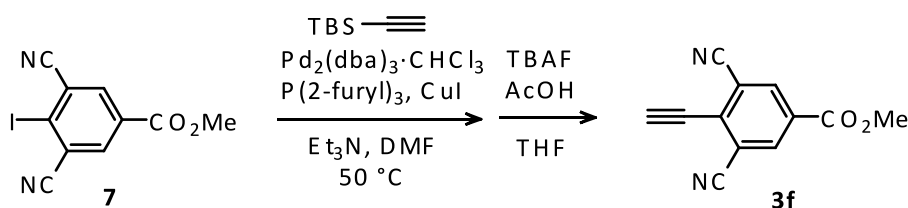

**Scheme S2.** Synthesis of **3f**

### Methyl 3,5-dicyano-4-ethynylbenzoate (3f)

To a solution of **7** (511 mg, 1.64 mmol), TBS-acetylene (460 μL, 2.46 mmol), and Et<sub>3</sub>N (691 μL, 4.92 mmol) in anhydrous DMF (16.4 mL) were added CuI (62.5 mg, 0.328 mmol), P(2-furyl)<sub>3</sub> (76.2 mg, 0.328 mmol), Pd<sub>2</sub>(dba)<sub>3</sub>·CHCl<sub>3</sub> (170 mg, 0.164 mmol) under Ar atmosphere at room temperature. After stirred at 50 °C for 2 h, the mixture was quenched with 1 M HCl at room temperature and extracted with ether (twice). The combined organic layers were washed with water (x2) and brine, dried over MgSO<sub>4</sub>, bleached with activated charcoal, filtrated through Celite, and concentrated under reduced pressure. The crude product was dissolved in THF (16.4 mL). To the solution was added acetic acid (940 μL, 16.4 mmol) and TBAF (1.8 mL, 1 M solution in THF, 1.80 mmol). After stirred at room temperature for 30 min, the reaction mixture was quenched with 1 M HCl and extracted with ether (x3). The combined organic layers were washed with brine, dried over MgSO<sub>4</sub>, filtered, and concentrated under reduced

pressure. The residue was recrystallized from EtOAc to give **3f** (192 mg, 56% for 2 steps) as orange crystals: dec. 157 °C; <sup>1</sup>H NMR (500 MHz, CDCl<sub>3</sub>) δ 8.50 (s, 2H), 4.10 (s, 1H), 4.01 (s, 3H); <sup>13</sup>C NMR (125 MHz, CDCl<sub>3</sub>) δ 136.7, 132.6, 131.5, 117.9, 114.8, 93.7, 76.1, 53.4; IR (neat) 3261, 3070, 2231, 2109, 1729, 1319, 1228 cm<sup>-1</sup>; HRMS (FD) m/z [M]<sup>+</sup> calcd for [C<sub>12</sub>H<sub>6</sub>N<sub>2</sub>O<sub>2</sub>]<sup>+</sup> 210.0429, found 210.0434.

### Typical procedure for the click reaction

To a solution of **2** (52.1 mg, 0.137 mmol) and alkyne **3** (0.114 mmol) in THF (11 mL) were added TEA (80.0 μL, 0.570 mmol), 570 μL of the ligand-copper solution (0.01 M, 5.70 μmol) at room temperature. The mixture was stirred for 3 h and concentrated under reduced pressure. The residue was purified by silica gel column chromatography to give **1**.

### Preparation of ligand-copper solution

To a solution of bis[2-(*N,N*-dimethylaminoethyl)]ether (19.0 μL, 0.10 mmol) in THF (10 mL) was added copper(I) iodide (19 mg, 0.10 mmol) at room temperature. The mixture was stirred until homogeneous.

### 2-(3-cyanophenyl)-1,3a,6a-triazapentalene (**1c**)

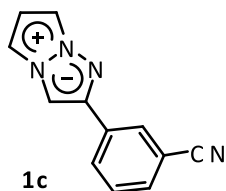

Green solid; mp 118–123 °C (recrystallized from ether); <sup>1</sup>H NMR (500 MHz, CDCl<sub>3</sub>) δ 8.04 (t, *J* = 1.8 Hz, 1H), 7.98 (ddd, *J* = 8.0, 1.7, 1.1 Hz, 1H), 7.59 (ddd, *J* = 8.0, 1.7, 1.2 Hz, 1H), 7.51 (t, *J* = 8.0 Hz, 1H), 7.44 (d, *J* = 2.3 Hz, 1H), 7.42 (s, 1H), 7.16 (d, *J* = 2.9 Hz, 1H), 6.65 (t, *J* = 2.9 Hz, 1H); <sup>13</sup>C NMR (125 MHz, CDCl<sub>3</sub>) δ 145.3, 132.8, 131.4, 129.8, 129.4, 129.2, 118.6, 112.8, 109.2, 102.6, 101.4, 93.5; IR (neat) 3150, 2227, 1435, 1378, 1144, 969, 844 cm<sup>-1</sup>; HRMS (ESI) m/z [M+H]<sup>+</sup> calcd for [C<sub>12</sub>H<sub>8</sub>N<sub>4</sub>]<sup>+</sup> 209.0822, found 209.0824. UV/Vis (CH<sub>2</sub>Cl<sub>2</sub>): λ<sub>max</sub> (log ε) = 327 (3.45), 282 (4.15), 274 (4.16), 260 (4.20) nm. FL (CH<sub>2</sub>Cl<sub>2</sub>): λ<sub>max</sub> = 493 nm; Φ<sub>F</sub> = 0.24 (reference to 9,10-DPA; excited at 370 nm).

### 2-(2-cyanophenyl)-1,3a,6a-triazapentalene (**1d**)

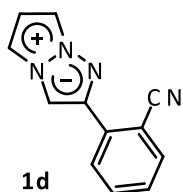

Light green solid; mp 85–87 °C (recrystallized from ether); <sup>1</sup>H NMR (500 MHz, CDCl<sub>3</sub>) δ 8.09 (dd, *J* = 8.0, 1.1 Hz, 1H), 7.93 (d, *J* = 1.2 Hz, 1H), 7.74 (dd, *J* = 8.0, 1.1 Hz, 1H), 7.66 (td, *J* = 8.0, 1.2 Hz, 1H), 7.46 (d, *J* = 2.9 Hz, 1H), 7.43 (td, *J* = 8.0, 1.2 Hz, 1H), 7.19 (d, *J* = 2.8 Hz, 1H), 6.68 (t, *J* = 2.9 Hz, 1H); <sup>13</sup>C NMR (125 MHz, CDCl<sub>3</sub>) δ 143.4, 134.4, 133.9, 133.0, 128.4, 128.1, 119.1, 109.5, 109.0, 102.3, 101.4, 96.0; IR (neat) 3152, 2223, 1474, 1424, 949 cm<sup>-1</sup>; HRMS (ESI) m/z [M+Na]<sup>+</sup> calcd for [C<sub>12</sub>H<sub>8</sub>N<sub>3</sub>O<sub>2</sub>+Na]<sup>+</sup> 231.0641, found 231.0642. UV/Vis

(CH<sub>2</sub>Cl<sub>2</sub>):  $\lambda_{\max}$  (log  $\epsilon$ ) = 376 (3.11), 287 (4.19), ~270 (4.10), 260 (4.12) nm. FL (CH<sub>2</sub>Cl<sub>2</sub>):  $\lambda_{\max}$  = 515 nm;  $\Phi_F$  = 0.24 (reference to 9,10-DPA; excited at 370 nm).

### 2-(4-(methoxycarbonyl)phenyl)-1,3a,6a-triazapentalene (1g)

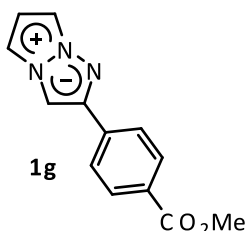

Green solid; mp 148–153 °C; <sup>1</sup>H NMR (500 MHz, CDCl<sub>3</sub>)  $\delta$  8.09 (d,  $J$  = 8.6 Hz, 2H), 7.84 (d,  $J$  = 8.6 Hz, 2H), 7.47 (s, 1H), 7.45 (d,  $J$  = 2.8 Hz, 1H), 7.15 (d,  $J$  = 2.8 Hz, 1H), 6.64 (t,  $J$  = 2.9 Hz, 1H), 3.94 (s, 1H); <sup>13</sup>C NMR (125 MHz, CDCl<sub>3</sub>)  $\delta$  166.8, 146.4, 135.8, 130.0, 129.6, 125.5, 109.2, 102.4, 101.1, 94.0, 52.1; IR (neat) 3152, 3134, 3120, 1710, 1433, 1417, 1280, 1104 cm<sup>-1</sup>; HRMS (ESI)  $m/z$  [M+Na]<sup>+</sup> calcd for [C<sub>13</sub>H<sub>11</sub>N<sub>3</sub>O<sub>2</sub>+Na]<sup>+</sup> 264.0744, found 264.0745. UV/Vis (CH<sub>2</sub>Cl<sub>2</sub>):  $\lambda_{\max}$  (log  $\epsilon$ ) = 376 (3.09), 287 (4.14) nm. FL (CH<sub>2</sub>Cl<sub>2</sub>):  $\lambda_{\max}$  = 521 nm;  $\Phi_F$  = 0.44 (reference to 9,10-DPA; excited at 370 nm).

### 2-(2-cyano-4-(methoxycarbonyl)phenyl)-1,3a,6a-triazapentalene (1e)

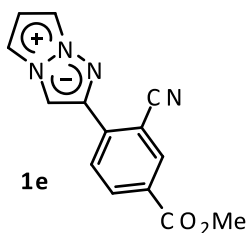

Light brown powder; <sup>1</sup>H NMR (500 MHz, CDCl<sub>3</sub>)  $\delta$  8.40 (d,  $J$  = 1.5 Hz, 1H), 8.28 (dd,  $J$  = 8.5, 1.5 Hz, 1H), 8.22 (d,  $J$  = 8.5 Hz, 1H), 8.06 (d,  $J$  = 1.0 Hz, 1H), 7.48 (d,  $J$  = 2.5 Hz, 1H), 7.23 (d,  $J$  = 3.0 Hz, 1H), 6.71 (dd,  $J$  = 3.0, 2.5 Hz, 1H), 3.97 (s, 3H); <sup>13</sup>C NMR (125 MHz, CDCl<sub>3</sub>)  $\delta$  164.9, 142.4, 138.2, 135.2, 133.7, 129.8, 128.5, 118.3, 110.0, 109.0, 102.5, 101.8, 96.7, 52.6; IR (neat) 3170, 3155, 2226, 1716, 1296 cm<sup>-1</sup>; HRMS (ESI)  $m/z$  [M+Na]<sup>+</sup> calcd for [C<sub>14</sub>H<sub>10</sub>N<sub>4</sub>O<sub>2</sub>+Na]<sup>+</sup> 289.0696, found 289.0698. UV/Vis (CH<sub>2</sub>Cl<sub>2</sub>):  $\lambda_{\max}$  (log  $\epsilon$ ) = 420 (2.80), 285 (3.98) nm. FL (CH<sub>2</sub>Cl<sub>2</sub>):  $\lambda_{\max}$  = 572 nm;  $\Phi_F$  = 0.34 (reference to rhodamine B; excited at 400 nm).

### 2-(2,6-dicyano-4-(methoxycarbonyl)phenyl)-1,3a,6a-triazapentalene (1f)

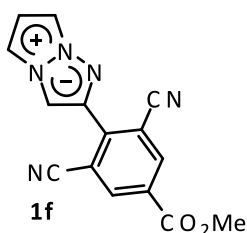

Dark brown solid; dec. 195 °C; <sup>1</sup>H NMR (500 MHz, CDCl<sub>3</sub>)  $\delta$  8.61 (s, 2H), 7.80 (s, 2H), 7.59 (d,  $J$  = 2.0 Hz, 1H), 7.30 (d,  $J$  = 2.5 Hz, 1H), 6.77 (t,  $J$  = 2.5 Hz, 1H), 4.03 (s, 3H); <sup>13</sup>C NMR (125 MHz, CDCl<sub>3</sub>)  $\delta$  163.1, 140.5, 139.4, 138.5, 130.9, 116.3, 113.9, 110.3, 103.4, 102.2, 97.4, 53.3; IR (neat) 3179, 3158, 3141, 3064, 2231, 1732, 1717, 1558, 1541, 1521, 1507, 1315, 1232 cm<sup>-1</sup>; HRMS (ESI)  $m/z$  [M+Na]<sup>+</sup> calcd for [C<sub>15</sub>H<sub>9</sub>N<sub>5</sub>O<sub>2</sub>+Na]<sup>+</sup> 314.0648, found 314.0648. UV/Vis (CH<sub>2</sub>Cl<sub>2</sub>):  $\lambda_{\max}$  (log  $\epsilon$ ) = 466 (3.20), 286 (4.42) nm. FL (CH<sub>2</sub>Cl<sub>2</sub>):  $\lambda_{\max}$  = 632 nm;  $\Phi_F$  = 0.096 (reference to rhodamine B; excited at 430 nm).

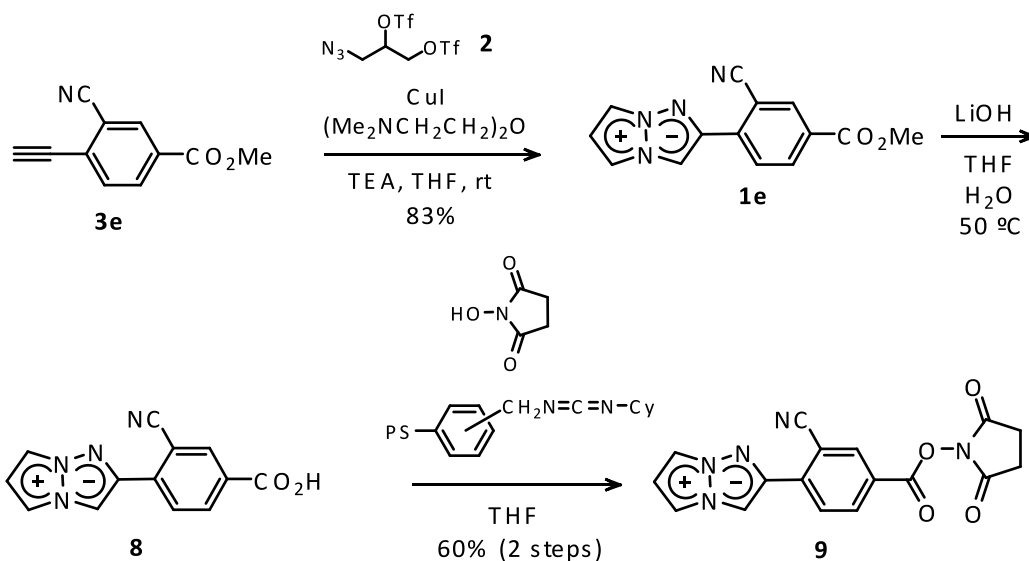

**Scheme S3.** Synthesis of *N*-succinimidyl ester **11**

#### Typical procedure for large-scale synthesis of **1e**.

To a solution of azide **2** (5.10 g, 13.4 mmol) and alkyne **3e** (2.25 g, 12.2 mmol) in THF (610 mL) were added the homogeneous solution of CuI (116 mg, 0.610 mmol), bis [2-(*N,N*-dimethylaminoethyl)]ether (115  $\mu$ L, 0.610 mmol) and Et<sub>3</sub>N (8.6 mL, 61.0 mmol) in THF (61 mL) at room temperature. After the resulting mixture was stirred for 24 h, the solvent was removed to less than one third under reduced pressure and then aq 5% NH<sub>3</sub> was poured to precipitate a powder. The powder was separated by filtration and dried *in vacuo* to afford **1e** (2.7 g, 83%) as a light brown powder.

#### 2-(2-cyano-4-(((2,5-dioxopyrrolidin-1-yl)oxy)carbonyl)phenyl)-1,3a,6a-triazapentalene (**9**)

To a solution of **1e** (2.70 g, 10.1 mmol) in H<sub>2</sub>O (50 mL) and THF (101 mL) was added LiOH·H<sub>2</sub>O (510 mg, 12.1 mmol) at room temperature. After stirred at 50 °C for 30 min, the mixture was washed with ether (x1), acidified by 1M HCl to participate yellow solid. The solid was dissolved in THF/EtOAc mixture and the organic layer was separated. After the aqueous layer was extracted with THF/EtOAc (x2), the combined organic layers were dried over MgSO<sub>4</sub>, filtered, and concentrated *in vacuo*. The residue was dehydrated by toluene azeotropy and dissolved in THF (54 mL). To the mixture were added *N*-hydroxysuccinimide (1.23 g, 10.7 mmol) and *N*-cyclohexylcarbodiimidomethyl polystyrene resin (8.7 g, 13.0 mmol, TCI No. C2141,

1.5 mmol/g loading) at room temperature. After the reaction mixture was stirred for 1 h, solid materials were removed by filtration and the residue was washed with THF. The filtrate was concentrated *in vacuo* to form red powder. This powder was dispersed to hexane, filtered, washed with ether and CH<sub>2</sub>Cl<sub>2</sub> to give **11** (2.1 g, 56% for 2 steps) as a red powder: dec. 200 °C; <sup>1</sup>H NMR (500 MHz, CD<sub>2</sub>Cl<sub>2</sub>) δ 8.50 (d, *J* = 1.5 Hz, 1H), 8.35 (dd, *J* = 8.0, 1.5 Hz, 1H), 8.31 (d, *J* = 8.5 Hz, 1H), 8.11 (s, 1H), 7.51 (d, *J* = 2.5 Hz, 1H), 7.29 (d, *J* = 3.0 Hz, 1H), 6.75 (dd, *J* = 3.0, 2.5 Hz, 1H), 2.91 (brs, 4H); <sup>13</sup>C NMR (100 MHz, DMSO-*d*<sub>6</sub>) δ 170.1, 160.2, 141.4, 139.5, 136.0, 134.2, 129.2, 124.1, 117.4, 110.5, 109.1, 103.3, 102.9, 97.4, 25.5; IR (neat) 3181, 3141, 2225, 1773, 1737, 1200 cm<sup>-1</sup>; HRMS (ESI) *m/z* [M+Na]<sup>+</sup> calcd for [C<sub>17</sub>H<sub>12</sub>N<sub>5</sub>O<sub>4</sub>+Na]<sup>+</sup> 350.0884, found 350.0886. UV/Vis (CH<sub>2</sub>Cl<sub>2</sub>): λ<sub>max</sub> (log ε) = 446 (3.38), 287 (4.47) nm. FL (CH<sub>2</sub>Cl<sub>2</sub>): λ<sub>max</sub> = 624 nm (fluorescence quantum yield was not estimated because of gradual degradation of **9** under the measurement condition.)

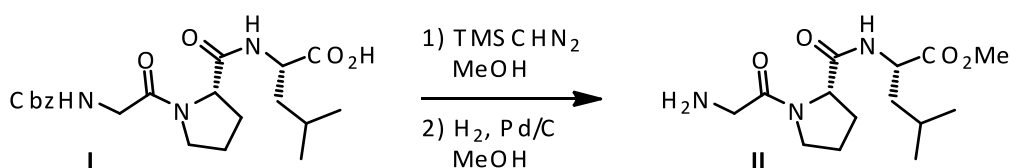

**Scheme S4.** Synthesis of tripeptide **II**

To a solution of **I** (104.9 mg, 0.250 mmol) in MeOH (2.5 mL) was added TMSCHN<sub>2</sub> (1.3 mL, 2.60 mmol, 2.0 M ether solution) at room temperature. After stirred for 1 h, the mixture was concentrated *in vacuo*. The residue was dissolved in MeOH (2.5 mL) and to the resulting solution was added 10% Pd/C (12 mg). After stirred for 24 h under H<sub>2</sub> atmosphere, the suspension was diluted with CHCl<sub>3</sub>, filtered through Celite, and concentrated *in vacuo*. The residue was purified by silica-gel column chromatography to give **II** (86.7 mg, quant) as a colorless amorphous solid: <sup>1</sup>H NMR (400 MHz, CDCl<sub>3</sub>) δ 7.96 (d, *J* = 7.2 Hz, 1H), 4.65 (dd, *J* = 7.6, 2.4 Hz, 1H), 4.42 (ddd, *J* = 10.0, 7.6, 5.2 Hz, 1H), 4.13 (d, *J* = 16.0 Hz, 1H), 3.98 (d, *J* = 15.6 Hz, 1H), 3.71 (s, 3H), 3.73–3.60 (m, 1H), 3.51 (dd, *J* = 16.8, 8.8 Hz, 1H), 2.23–1.85 (m, 5H), 1.72–1.50 (m, 2H), 0.93 (d, *J* = 6.4 Hz, 3H), 0.88 (d, *J* = 6.4 Hz, 3H); <sup>13</sup>C NMR (400 MHz, CDCl<sub>3</sub>) δ 174.0, 172.1, 167.1, 60.8, 52.4, 51.4, 46.8, 41.8, 39.4, 29.8, 25.0, 24.3, 22.8, 21.4; IR (neat) 3148 (br), 3054, 2958, 2874, 1740, 1654, 1540, 1228, 1209, 669 (br) cm<sup>-1</sup>; HRMS (ESI) *m/z* [M+Na]<sup>+</sup> calcd for [C<sub>14</sub>H<sub>25</sub>N<sub>3</sub>O<sub>4</sub>+Na]<sup>+</sup> 322.1743, found 322.1743.





2228, 1742, 1646, 1541, 1314, 1203  $\text{cm}^{-1}$ ; HRMS (ESI)  $m/z$   $[\text{M}+\text{Na}]^+$  calcd for  $[\text{C}_{27}\text{H}_{31}\text{N}_7\text{O}_5+\text{Na}]^+$  556.2284, found 556.2283. UV/Vis ( $\text{CH}_2\text{Cl}_2$ ):  $\lambda_{\text{max}}$  ( $\log \epsilon$ ) = 379 (3.34), 283 (4.26) nm. FL ( $\text{CH}_2\text{Cl}_2$ ):  $\lambda_{\text{max}}$  = 561 nm;  $\Phi_{\text{F}}$  = 0.24 (reference to rhodamine B; excited at 400 nm).

### 2-(4-(methoxycarbonyl)phenyl)-4-phenyl-1,3a,6a-triazapentalene (III)

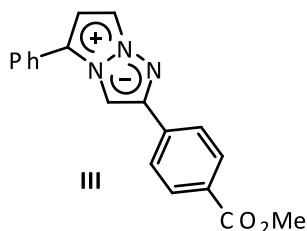

Green solid; mp. 124–127  $^{\circ}\text{C}$ ;  $^1\text{H}$  NMR (400 MHz,  $\text{CDCl}_3$ )  $\delta$  8.11 (d,  $J$  = 10.8 Hz, 2H), 7.90 (d,  $J$  = 10.8 Hz, 2H), 7.86 (s, 1H), 7.60 (d,  $J$  = 10.0 Hz, 2H), 7.58 (d,  $J$  = 3.6 Hz, 1H), 7.49 (t,  $J$  = 10.0 Hz, 2H), 7.32–7.24 (m, 1H), 6.88 (d,  $J$  = 4.0 Hz, 1H), 3.94 (s, 3H);  $^{13}\text{C}$  NMR (125 MHz,  $\text{CDCl}_3$ )  $\delta$  166.7, 147.0, 135.6, 130.0, 129.8, 129.7, 129.2, 126.3, 125.6, 123.4, 115.5, 106.7, 104.4, 94.5, 52.1; IR (neat) 3155, 1950, 1715, 1277  $\text{cm}^{-1}$ ; HRMS (ESI)  $m/z$   $[\text{M}+\text{Na}]^+$  calcd for  $[\text{C}_{19}\text{H}_{15}\text{N}_3\text{O}_2\text{Na}]^+$  340.1062, found 340.1064. UV/Vis ( $\text{CH}_2\text{Cl}_2$ ):  $\lambda_{\text{max}}$  ( $\log \epsilon$ ) = 345 (4.35), 279 (4.44) nm. FL ( $\text{CH}_2\text{Cl}_2$ ):  $\lambda_{\text{max}}$  = 548 nm;  $\Phi_{\text{F}}$  = 0.36 (reference to rhodamine B; excited at 400 nm).

### 2-(2-cyano-4-(methoxycarbonyl)phenyl)-4-phenyl-1,3a,6a-triazapentalene (IV)

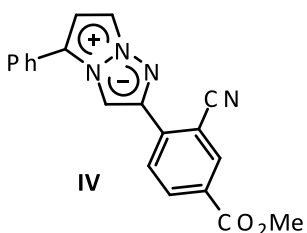

Orange solid; dec. 216  $^{\circ}\text{C}$ ;  $^1\text{H}$  NMR (400 MHz,  $\text{CDCl}_3$ )  $\delta$  8.44 (s, 1H), 8.39 (s, 1H), 8.31 (d,  $J$  = 8.0 Hz, 1H), 8.24 (d,  $J$  = 8.0 Hz, 1H), 7.66–7.59 (m, 3H), 7.50 (t,  $J$  = 7.6 Hz, 2H), 7.30 (t,  $J$  = 7.6 Hz, 1H), 6.95 (d,  $J$  = 2.8 Hz, 1H), 3.98 (s, 3H);  $^{13}\text{C}$  NMR (125 MHz,  $\text{CDCl}_3$ )  $\delta$  164.9, 143.1, 138.0, 135.3, 133.8, 130.2, 129.4, 129.4, 128.7, 126.8, 123.7, 118.3, 116.3, 109.3, 107.6, 104.5, 96.9, 52.7; IR (neat) 3155, 2960, 2228, 1733, 1300  $\text{cm}^{-1}$ ; HRMS (ESI)  $m/z$   $[\text{M}+\text{H}]^+$  calcd for  $[\text{C}_{20}\text{H}_{15}\text{N}_4\text{O}_2]^+$  343.1195, found 343.1198. UV/Vis ( $\text{CH}_2\text{Cl}_2$ ):  $\lambda_{\text{max}}$  ( $\log \epsilon$ ) = 432 (3.66), 336 (4.58), 282 (4.48) nm. FL ( $\text{CH}_2\text{Cl}_2$ ):  $\lambda_{\text{max}}$  = 613 nm;  $\Phi_{\text{F}}$  = 0.070 (reference to rhodamine B; excited at 400 nm).

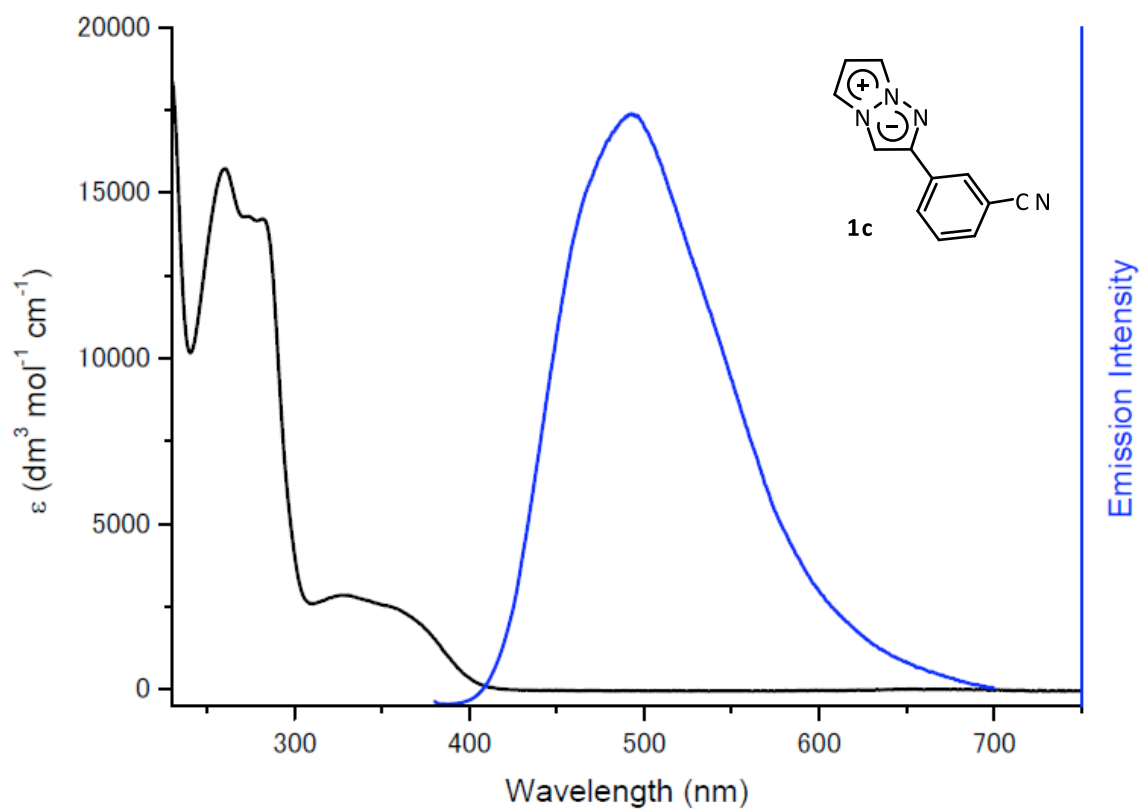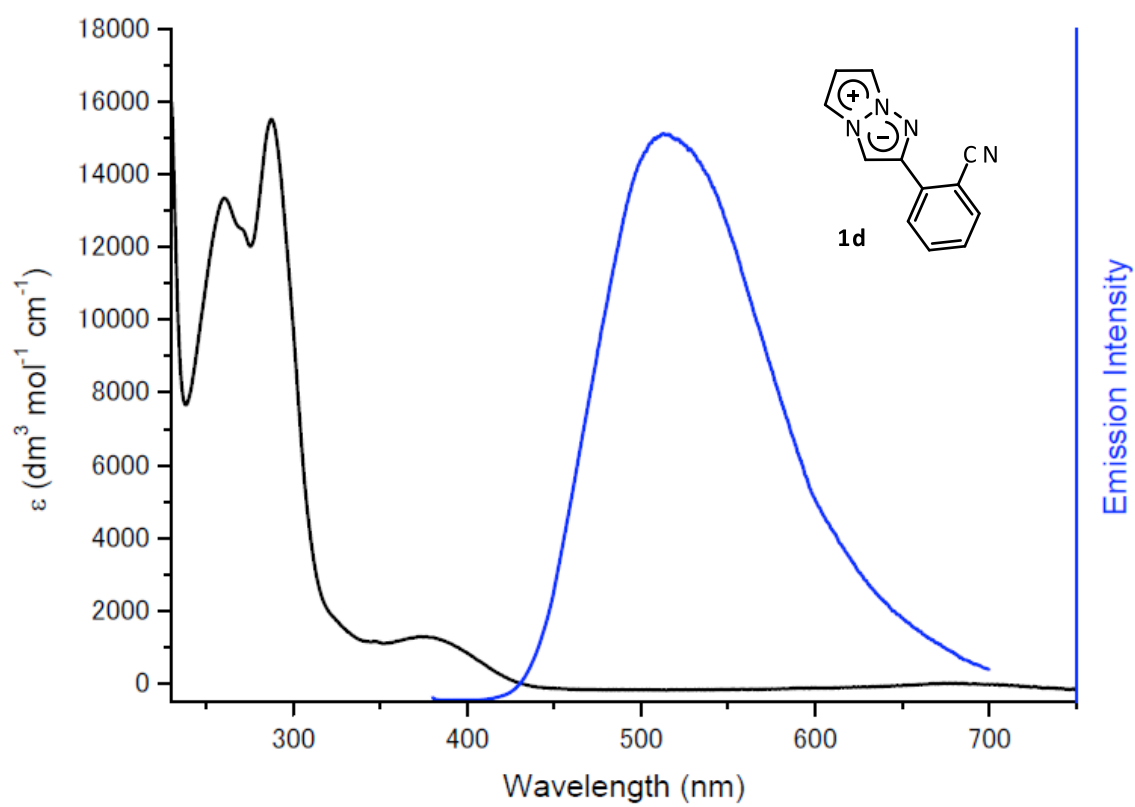

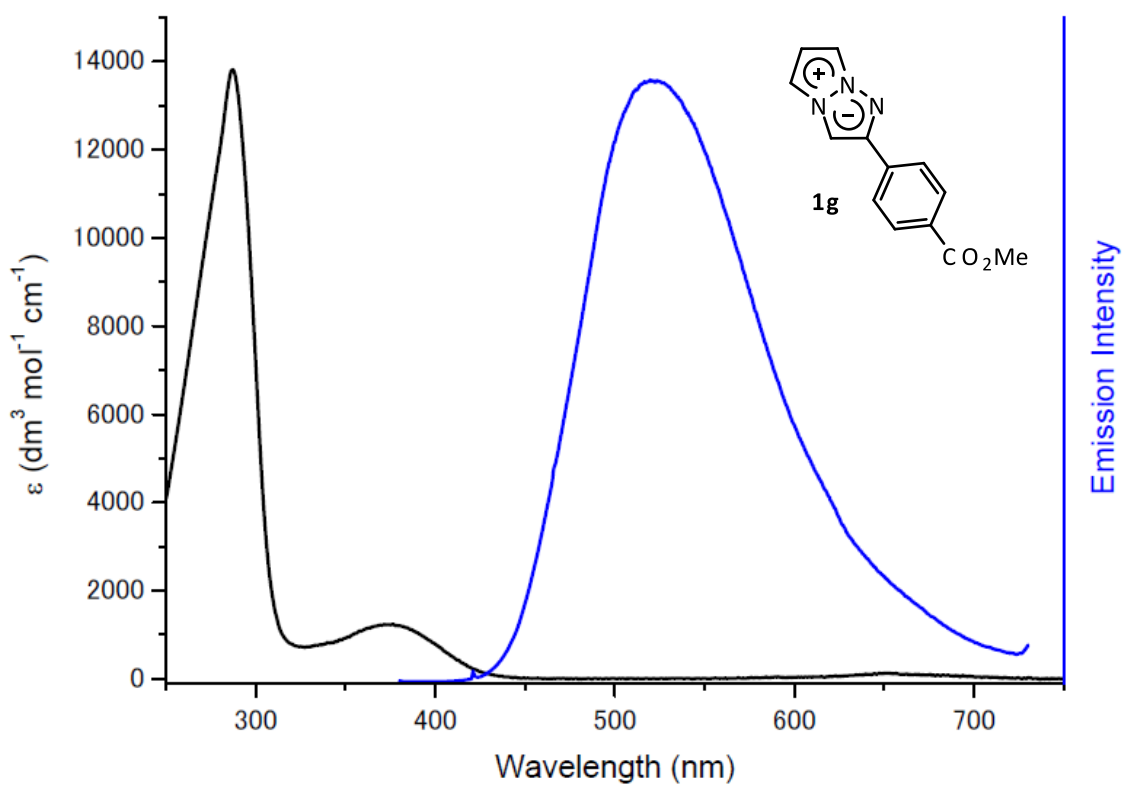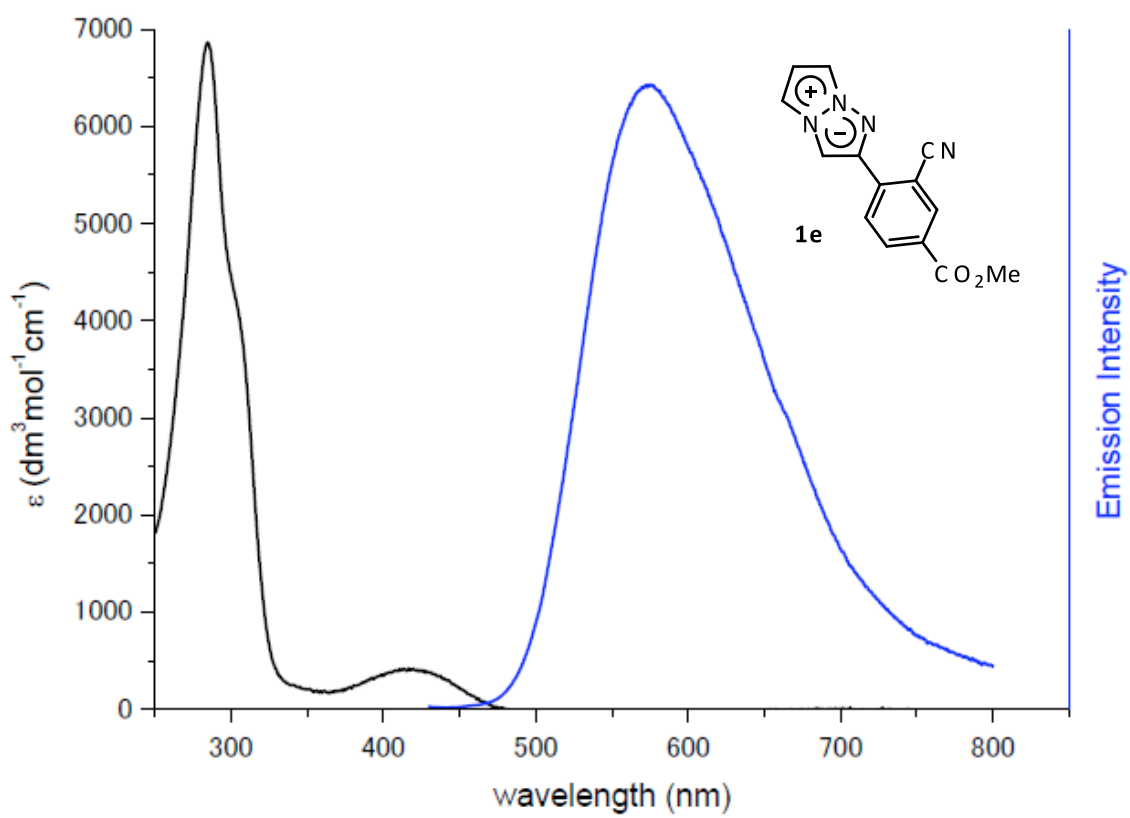

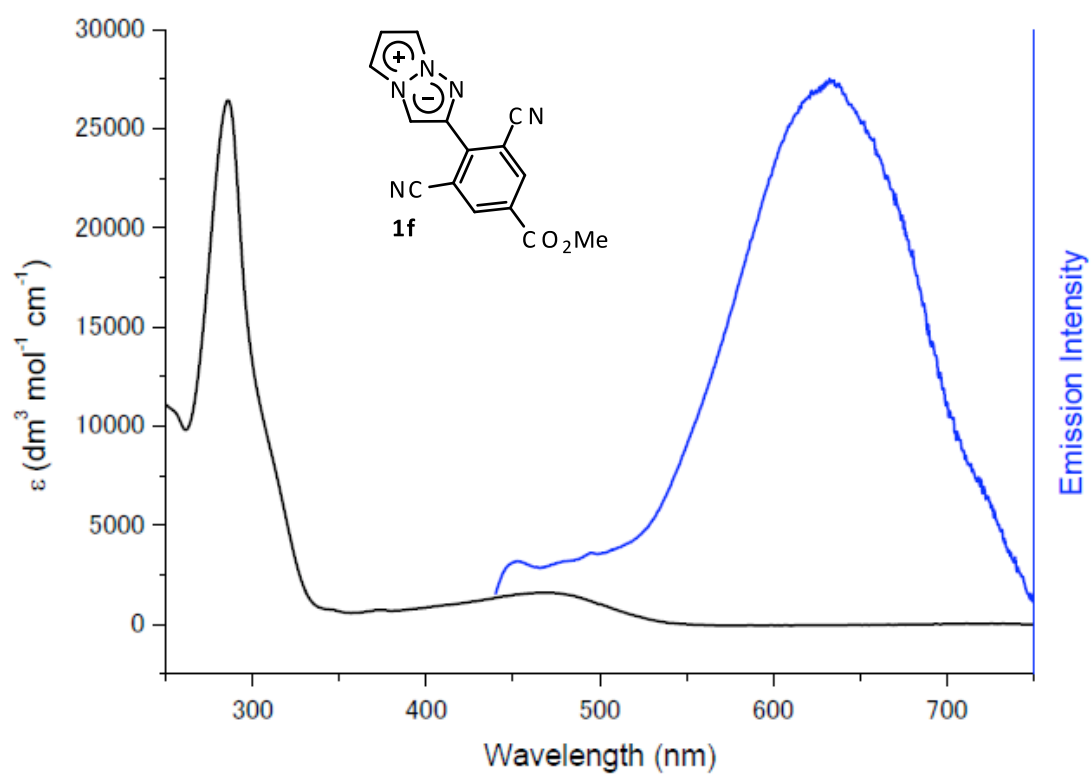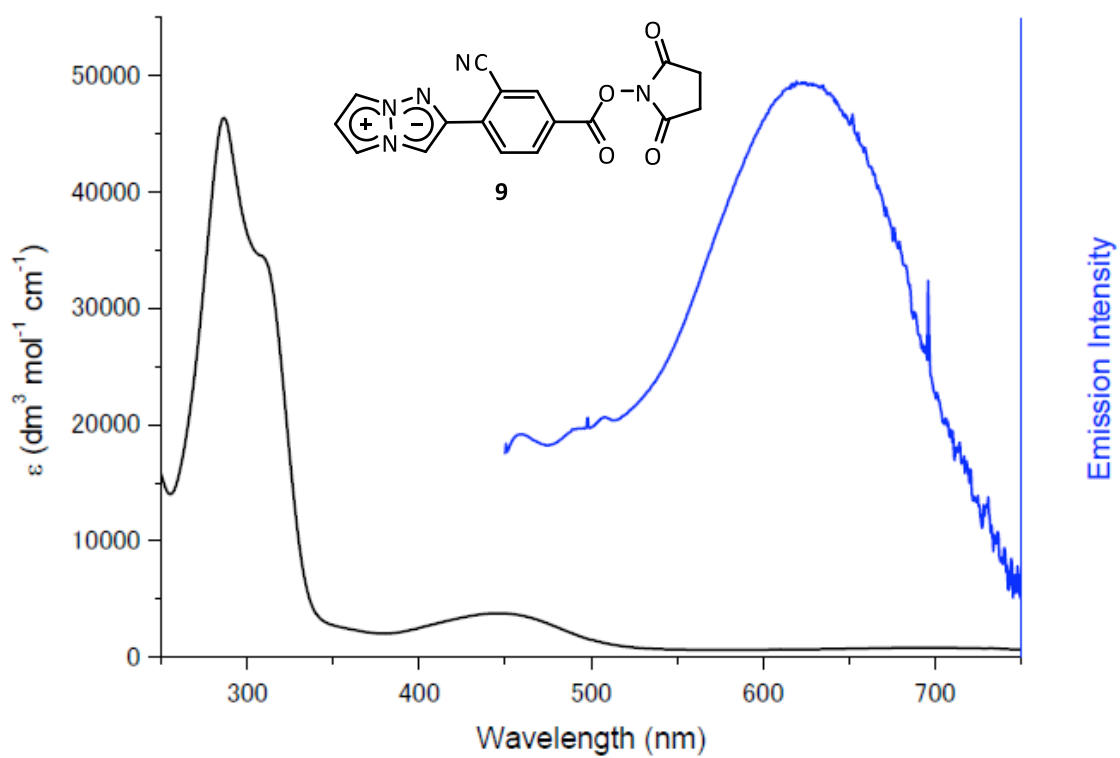

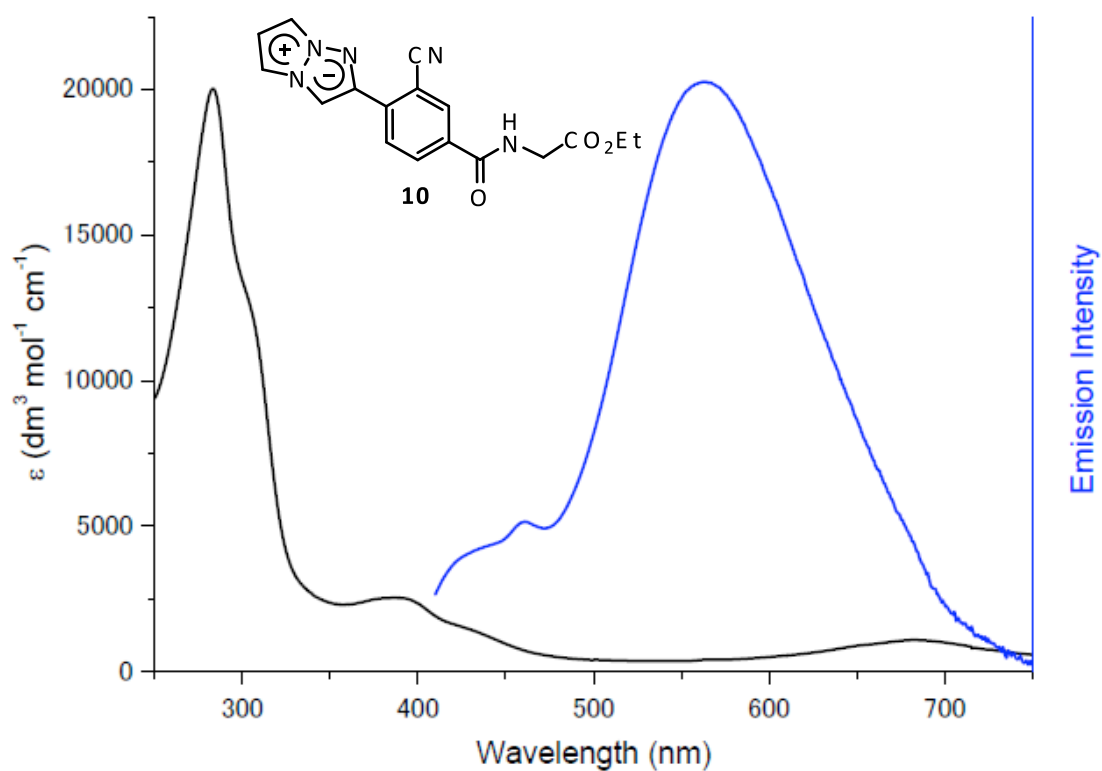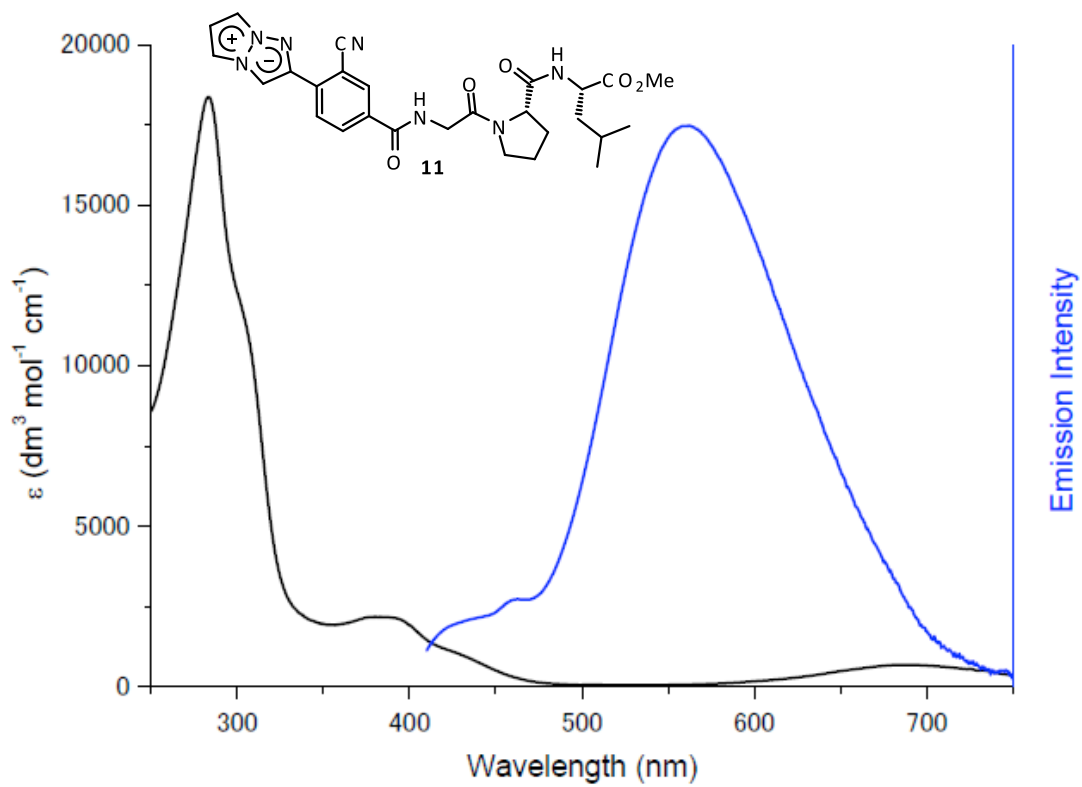

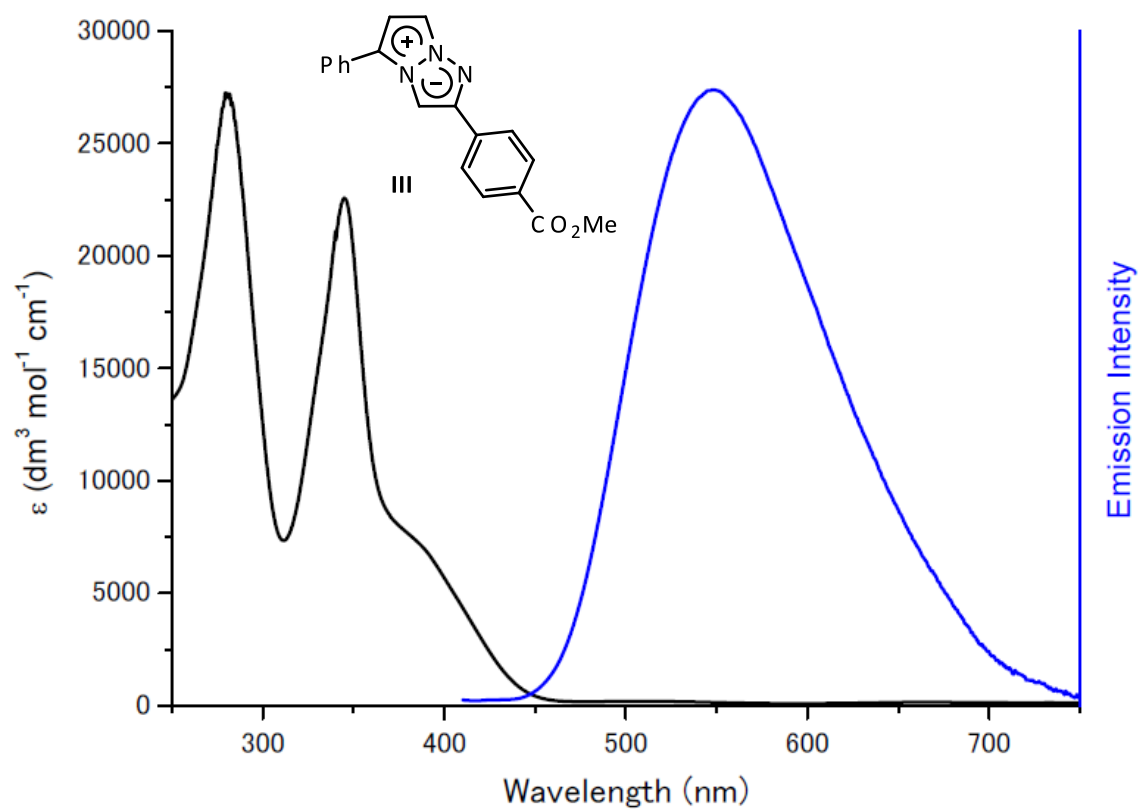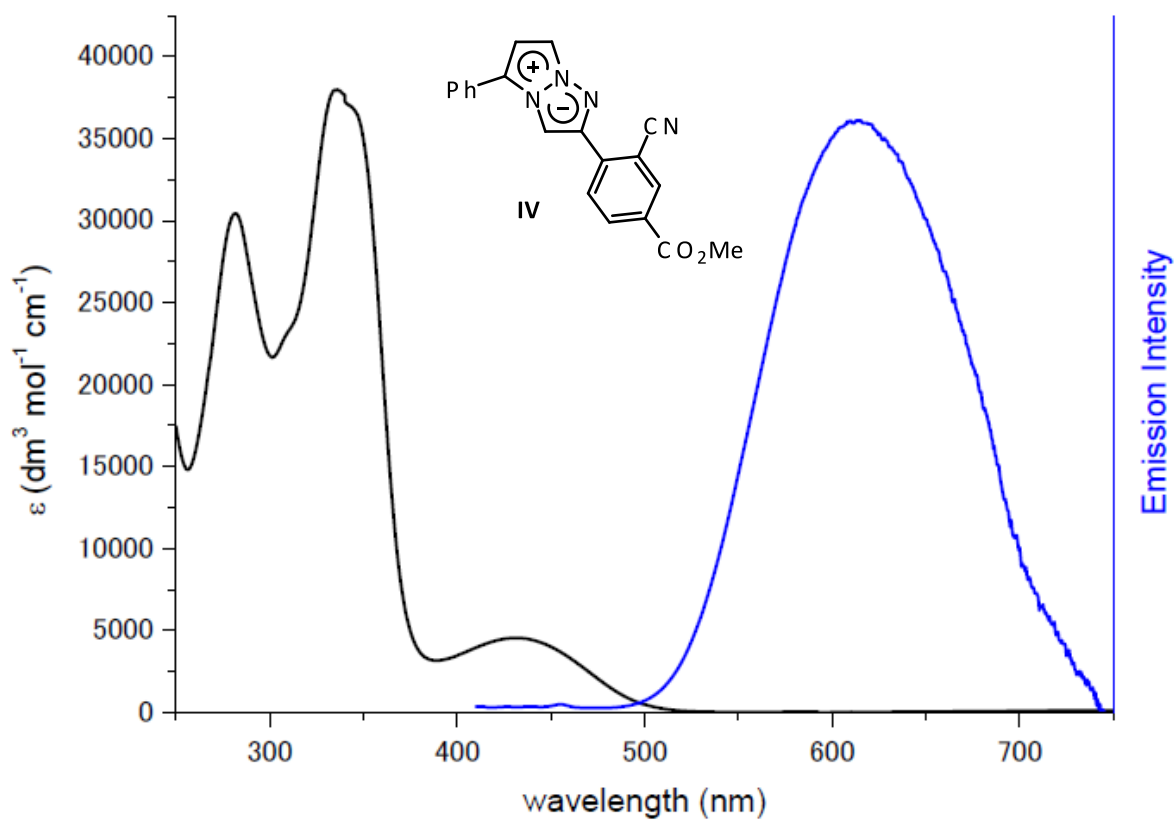

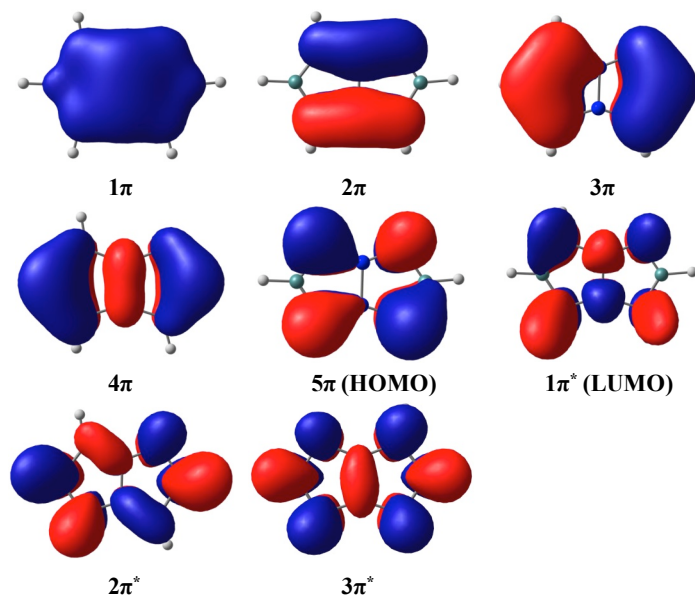

**Figure S1.** Active orbitals of **1a** at  $(S_0)_{\min}$  in the SA-CASSCF(10,8) calculation.

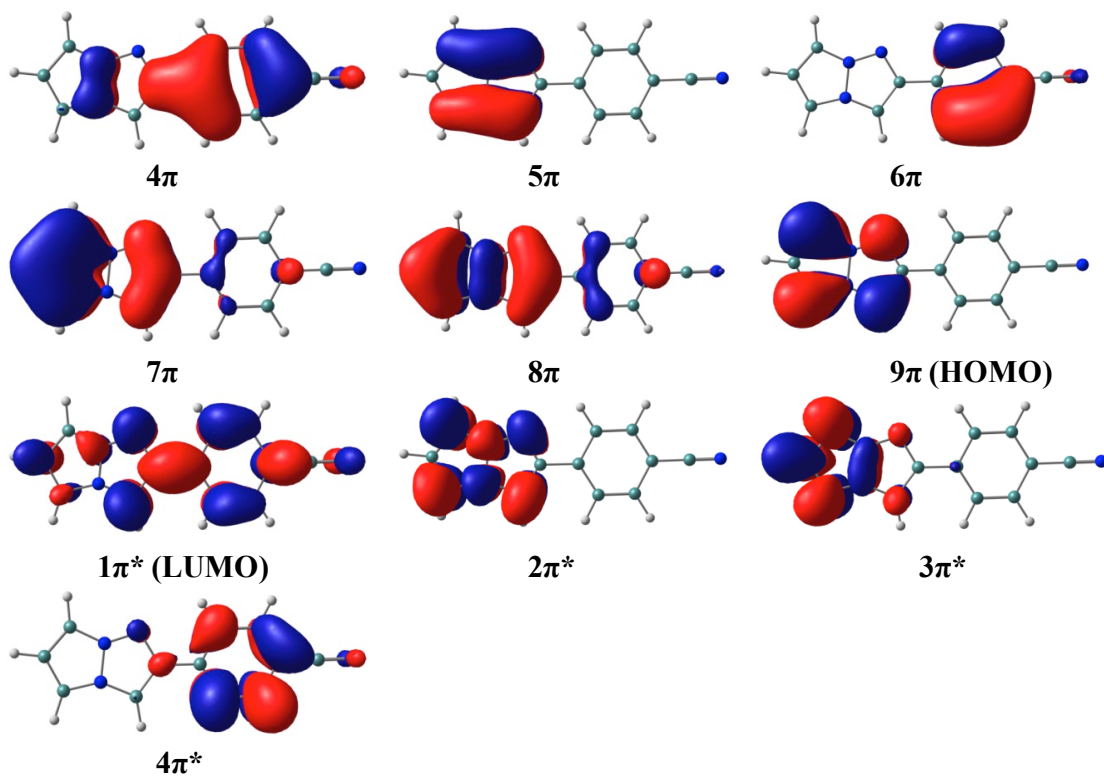

**Figure S2.** Active orbitals of **1b** at  $(S_0)_{\min}$  in the SA-CASSCF(12,10) calculation.



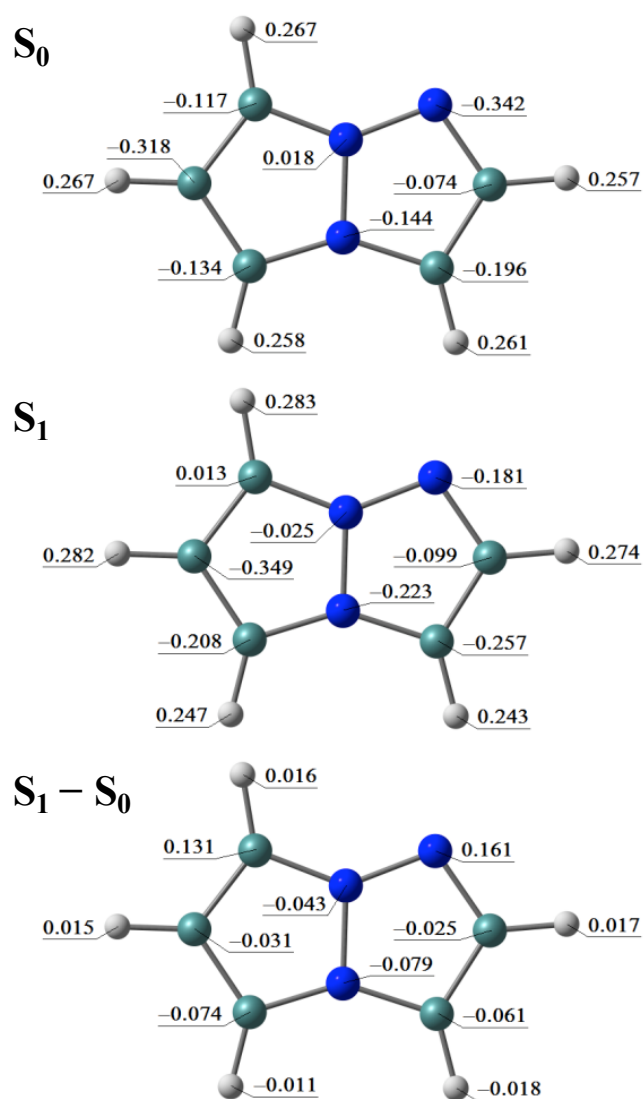

**Figure S3.** Natural charges of **1a** in the S<sub>0</sub> and S<sub>1</sub> states and their differences at (S<sub>0</sub>)<sub>min</sub> in gas phase.

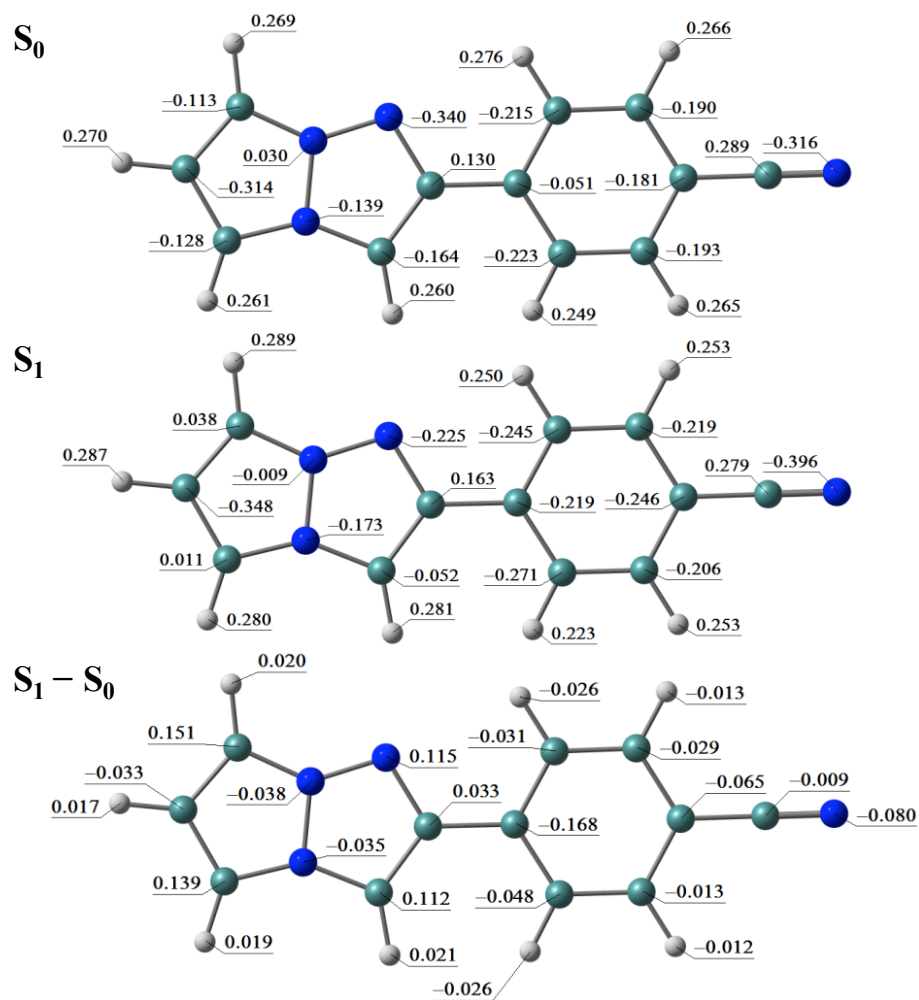

**Figure S4.** Natural charges of **1b** in the  $S_0$  and  $S_1$  states and their differences at  $(S_0)_{\min}$  in gas phase.

**Table SI.** Sum of the Natural Charges in the 1,3a,6a-Triazapentalene Skeleton and Dipole Moments (in Debye) in the  $S_0$  and  $S_1$  States at  $(S_0)_{\min}$  and  $(S_1)_{\min}$  in the Gas Phase.

|                   | Charge<br>( $S_0$ ) | Charge<br>( $S_1$ ) | $\mu$ ( $S_0$ ) | $\mu$ ( $S_1$ ) |
|-------------------|---------------------|---------------------|-----------------|-----------------|
| <b>1a</b>         |                     |                     |                 |                 |
| at $(S_0)_{\min}$ | –                   | –                   | 2.50            | 4.67            |
| at $(S_1)_{\min}$ | –                   | –                   | 2.44            | 1.15            |
| <b>1b</b>         |                     |                     |                 |                 |
| at $(S_0)_{\min}$ | 0.022               | 0.542               | 7.11            | 19.47           |
| at $(S_1)_{\min}$ | 0.026               | 0.507               | 6.96            | 18.34           |
| <b>1g</b>         |                     |                     |                 |                 |
| at $(S_0)_{\min}$ | 0.013               | 0.527               | 2.68            | 15.66           |
| at $(S_1)_{\min}$ | 0.019               | 0.501               | 2.93            | 14.97           |
| <b>1e</b>         |                     |                     |                 |                 |
| at $(S_0)_{\min}$ | 0.049               | 0.639               | 4.36            | 15.47           |
| at $(S_1)_{\min}$ | 0.053               | 0.621               | 4.15            | 14.71           |
| <b>1f</b>         |                     |                     |                 |                 |
| at $(S_0)_{\min}$ | 0.066               | 0.730               | 1.07            | 13.57           |
| at $(S_1)_{\min}$ | 0.064               | 0.703               | 0.68            | 12.74           |

**Table SII.** Sum of the Natural Charges in the 1,3a,6a-Triazapentalene Skeleton and Dipole Moments (in Debye) in the  $S_0$  and  $S_1$  States at  $(S_0)_{\min}$  and  $(S_1)_{\min}$  in Dichloromethane.

|                   | Charge<br>( $S_0$ ) | Charge<br>( $S_1$ ) | $\mu$ ( $S_0$ ) | $\mu$ ( $S_1$ ) |
|-------------------|---------------------|---------------------|-----------------|-----------------|
| <b>1a</b>         |                     |                     |                 |                 |
| at $(S_0)_{\min}$ | –                   | –                   | 3.34            | 2.66            |
| at $(S_1)_{\min}$ | –                   | –                   | 3.24            | 2.72            |
| <b>1b</b>         |                     |                     |                 |                 |
| at $(S_0)_{\min}$ | 0.030               | 0.603               | 8.81            | 24.33           |
| at $(S_1)_{\min}$ | 0.040               | 0.564               | 8.95            | 23.07           |
| <b>1g</b>         |                     |                     |                 |                 |
| at $(S_0)_{\min}$ | 0.022               | 0.585               | 3.56            | 19.52           |
| at $(S_1)_{\min}$ | 0.034               | 0.561               | 4.27            | 19.06           |
| <b>1e</b>         |                     |                     |                 |                 |
| at $(S_0)_{\min}$ | 0.056               | 0.694               | 5.42            | 19.14           |
| at $(S_1)_{\min}$ | 0.067               | 0.668               | 5.51            | 18.38           |
| <b>1f</b>         |                     |                     |                 |                 |
| at $(S_0)_{\min}$ | 0.066               | 0.793               | 2.00            | 16.52           |
| at $(S_1)_{\min}$ | 0.083               | 0.746               | 1.39            | 15.71           |

**Table SIII.** Cartesian Coordinates (in Å) of **1a** at  $(S_0)_{\min}$  and  $(S_1)_{\min}$  in the Gas Phase.

|     | $(S_0)_{\min}$ |          |         | $(S_1)_{\min}$ |          |         |
|-----|----------------|----------|---------|----------------|----------|---------|
|     | $x$            | $y$      | $z$     | $x$            | $y$      | $z$     |
| N1  | -0.00057       | -0.64502 | 0.00000 | -0.00538       | -0.64858 | 0.00000 |
| N2  | -1.24620       | -1.14933 | 0.00000 | -1.28575       | -1.15342 | 0.00000 |
| N3  | 0.01905        | 0.72879  | 0.00000 | 0.00719        | 0.73064  | 0.00000 |
| C4  | 1.27943        | -1.11948 | 0.00000 | 1.28843        | -1.11649 | 0.00000 |
| C5  | 2.11548        | -0.00090 | 0.00000 | 2.12167        | 0.00157  | 0.00000 |
| C6  | 1.32216        | 1.15036  | 0.00000 | 1.35056        | 1.16200  | 0.00000 |
| C7  | -1.30390       | 1.13512  | 0.00000 | -1.30368       | 1.13330  | 0.00000 |
| C8  | -2.02987       | -0.04554 | 0.00000 | -2.04517       | -0.06091 | 0.00000 |
| H9  | 1.47271        | -2.17846 | 0.00000 | 1.49519        | -2.17415 | 0.00000 |
| H10 | 3.19492        | -0.02134 | 0.00000 | 3.20027        | -0.03020 | 0.00000 |
| H11 | 1.57204        | 2.19812  | 0.00000 | 1.60461        | 2.20875  | 0.00000 |
| H12 | -1.58662       | 2.17318  | 0.00000 | -1.60244       | 2.16837  | 0.00000 |
| H13 | -3.10438       | -0.15393 | 0.00000 | -3.12128       | -0.14930 | 0.00000 |

**Table SIV.** Cartesian Coordinates (in Å) of **1a** at  $(S_0)_{\min}$  and  $(S_1)_{\min}$  in Dichloromethane.

|     | $(S_0)_{\min}$ |          |         | $(S_1)_{\min}$ |          |         |
|-----|----------------|----------|---------|----------------|----------|---------|
|     | $x$            | $y$      | $z$     | $x$            | $y$      | $z$     |
| N1  | 0.00159        | -0.64855 | 0.00000 | -0.00548       | -0.64828 | 0.00000 |
| N2  | -1.24918       | -1.15186 | 0.00000 | -1.29159       | -1.15696 | 0.00000 |
| N3  | 0.01920        | 0.72440  | 0.00000 | 0.00263        | 0.73345  | 0.00000 |
| C4  | 1.28176        | -1.12165 | 0.00000 | 1.29450        | -1.12038 | 0.00000 |
| C5  | 2.11628        | -0.00008 | 0.00000 | 2.12321        | 0.00234  | 0.00000 |
| C6  | 1.32031        | 1.14930  | 0.00000 | 1.35477        | 1.16053  | 0.00000 |
| C7  | -1.30419       | 1.13403  | 0.00000 | -1.30530       | 1.13044  | 0.00000 |
| C8  | -2.03257       | -0.04201 | 0.00000 | -2.05112       | -0.05871 | 0.00000 |
| H9  | 1.48087        | -2.18005 | 0.00000 | 1.50714        | -2.17722 | 0.00000 |
| H10 | 3.19592        | -0.01884 | 0.00000 | 3.20252        | -0.02724 | 0.00000 |
| H11 | 1.56519        | 2.19846  | 0.00000 | 1.61000        | 2.20728  | 0.00000 |
| H12 | -1.58309       | 2.17336  | 0.00000 | -1.60873       | 2.16481  | 0.00000 |
| H13 | -3.10786       | -0.14492 | 0.00000 | -3.12830       | -0.13849 | 0.00000 |

**Table SV.** Cartesian Coordinates (in Å) of **1b** at  $(S_0)_{\min}$  and  $(S_1)_{\min}$  in the Gas Phase.

|     | $(S_0)_{\min}$ |          |         | $(S_1)_{\min}$ |          |         |
|-----|----------------|----------|---------|----------------|----------|---------|
|     | $x$            | $y$      | $z$     | $x$            | $y$      | $z$     |
| N1  | 2.75523        | 0.64651  | 0.00000 | 2.77631        | 0.63267  | 0.00000 |
| N2  | 1.47816        | 1.04852  | 0.00000 | 1.51030        | 1.08209  | 0.00000 |
| N3  | 2.88283        | -0.72226 | 0.00000 | 2.85777        | -0.70763 | 0.00000 |
| C4  | 3.99282        | 1.21911  | 0.00000 | 4.01810        | 1.17539  | 0.00000 |
| C5  | 4.91390        | 0.16844  | 0.00000 | 4.92598        | 0.11028  | 0.00000 |
| C6  | 4.21410        | -1.04126 | 0.00000 | 4.18917        | -1.06431 | 0.00000 |
| C7  | 1.59978        | -1.23044 | 0.00000 | 1.58659        | -1.18935 | 0.00000 |
| C8  | 0.76690        | -0.11256 | 0.00000 | 0.73305        | -0.02497 | 0.00000 |
| H9  | 4.10405        | 2.28984  | 0.00000 | 4.15091        | 2.24474  | 0.00000 |
| H10 | 5.98824        | 0.27346  | 0.00000 | 6.00100        | 0.19013  | 0.00000 |
| H11 | 4.54570        | -2.06607 | 0.00000 | 4.48683        | -2.09994 | 0.00000 |
| H12 | 1.41271        | -2.28956 | 0.00000 | 1.37536        | -2.24409 | 0.00000 |
| C13 | -0.70215       | -0.07755 | 0.00000 | -0.68791       | -0.00518 | 0.00000 |
| C14 | -1.37665       | 1.15658  | 0.00000 | -1.41981       | 1.21928  | 0.00000 |
| C15 | -1.46013       | -1.26161 | 0.00000 | -1.42601       | -1.23017 | 0.00000 |
| C16 | -2.84963       | -1.22068 | 0.00000 | -2.80023       | -1.22280 | 0.00000 |
| C17 | -2.76590       | 1.20766  | 0.00000 | -2.78882       | 1.21870  | 0.00000 |
| C18 | -3.51587       | 0.01786  | 0.00000 | -3.51941       | -0.00563 | 0.00000 |
| H19 | -0.96431       | -2.22692 | 0.00000 | -0.91191       | -2.18610 | 0.00000 |
| H20 | -3.42490       | -2.14041 | 0.00000 | -3.34688       | -2.15996 | 0.00000 |
| H21 | -0.79659       | 2.07229  | 0.00000 | -0.88193       | 2.16063  | 0.00000 |
| H22 | -3.27772       | 2.16424  | 0.00000 | -3.33278       | 2.15696  | 0.00000 |
| C23 | -4.94901       | 0.06504  | 0.00000 | -4.93627       | -0.00465 | 0.00000 |
| N24 | -6.11286       | 0.10225  | 0.00000 | -6.10072       | -0.00365 | 0.00000 |

**Table SVI.** Cartesian Coordinates (in Å) of **1b** at  $(S_0)_{\min}$  and  $(S_1)_{\min}$  in Dichloromethane.

|     | $(S_0)_{\min}$ |          |          | $(S_1)_{\min}$ |          |          |
|-----|----------------|----------|----------|----------------|----------|----------|
|     | <i>x</i>       | <i>y</i> | <i>z</i> | <i>x</i>       | <i>y</i> | <i>z</i> |
| N1  | 2.76069        | 0.65279  | 0.00000  | 2.77528        | 0.64330  | 0.00000  |
| N2  | 1.48213        | 1.06167  | 0.00000  | 1.49876        | 1.09331  | 0.00000  |
| N3  | 2.87875        | -0.71668 | 0.00000  | 2.85255        | -0.70340 | 0.00000  |
| C4  | 4.00181        | 1.21645  | 0.00000  | 4.01061        | 1.17729  | 0.00000  |
| C5  | 4.91548        | 0.15731  | 0.00000  | 4.91770        | 0.10476  | 0.00000  |
| C6  | 4.20666        | -1.04668 | 0.00000  | 4.18317        | -1.06503 | 0.00000  |
| C7  | 1.59424        | -1.22030 | 0.00000  | 1.59001        | -1.18751 | 0.00000  |
| C8  | 0.76627        | -0.10129 | 0.00000  | 0.73561        | -0.02157 | 0.00000  |
| H9  | 4.12507        | 2.28628  | 0.00000  | 4.15608        | 2.24513  | 0.00000  |
| H10 | 5.99077        | 0.25460  | 0.00000  | 5.99274        | 0.18434  | 0.00000  |
| H11 | 4.52760        | -2.07505 | 0.00000  | 4.47554        | -2.10215 | 0.00000  |
| H12 | 1.40537        | -2.27933 | 0.00000  | 1.38537        | -2.24461 | 0.00000  |
| C13 | -0.70255       | -0.06863 | 0.00000  | -0.68152       | -0.01071 | 0.00000  |
| C14 | -1.38359       | 1.16289  | 0.00000  | -1.41831       | 1.21735  | 0.00000  |
| C15 | -1.45453       | -1.25806 | 0.00000  | -1.42632       | -1.23515 | 0.00000  |
| C16 | -2.84376       | -1.22438 | 0.00000  | -2.79753       | -1.22887 | 0.00000  |
| C17 | -2.77297       | 1.20888  | 0.00000  | -2.78598       | 1.21934  | 0.00000  |
| C18 | -3.51403       | 0.01297  | 0.00000  | -3.52061       | -0.00569 | 0.00000  |
| H19 | -0.95578       | -2.22113 | 0.00000  | -0.90914       | -2.18861 | 0.00000  |
| H20 | -3.41164       | -2.14834 | 0.00000  | -3.34156       | -2.16786 | 0.00000  |
| H21 | -0.81356       | 2.08464  | 0.00000  | -0.87856       | 2.15780  | 0.00000  |
| H22 | -3.28720       | 2.16391  | 0.00000  | -3.32630       | 2.16042  | 0.00000  |
| C23 | -4.94585       | 0.05351  | 0.00000  | -4.93040       | -0.00193 | 0.00000  |
| N24 | -6.11067       | 0.08644  | 0.00000  | -6.09848       | 0.00252  | 0.00000  |

**Table SVII.** Cartesian Coordinates (in Å) of **1g** at  $(S_0)_{\min}$  and  $(S_1)_{\min}$  in the Gas Phase.

|     | $(S_0)_{\min}$ |          |          | $(S_1)_{\min}$ |          |          |
|-----|----------------|----------|----------|----------------|----------|----------|
|     | $x$            | $y$      | $z$      | $x$            | $y$      | $z$      |
| N1  | 2.97119        | 2.15281  | 0.00000  | 2.97507        | 2.18381  | 0.00000  |
| N2  | 2.34703        | 0.96824  | 0.00000  | 2.40238        | 0.96675  | 0.00000  |
| N3  | 2.09873        | 3.21400  | 0.00000  | 2.07913        | 3.18568  | 0.00000  |
| C4  | 4.25392        | 2.61740  | 0.00000  | 4.23286        | 2.68369  | 0.00000  |
| C5  | 4.16838        | 4.01182  | 0.00000  | 4.11503        | 4.07938  | 0.00000  |
| C6  | 2.81961        | 4.37814  | 0.00000  | 2.76299        | 4.38317  | 0.00000  |
| C7  | 0.82986        | 2.67190  | 0.00000  | 0.84371        | 2.62212  | 0.00000  |
| C8  | 1.02394        | 1.29120  | 0.00000  | 1.07039        | 1.19454  | 0.00000  |
| H9  | 5.08652        | 1.93515  | 0.00000  | 5.08626        | 2.02590  | 0.00000  |
| H10 | 5.00532        | 4.69369  | 0.00000  | 4.92865        | 4.78654  | 0.00000  |
| H11 | 2.33338        | 5.33921  | 0.00000  | 2.23660        | 5.32331  | 0.00000  |
| H12 | -0.04868       | 3.29205  | 0.00000  | -0.05531       | 3.21274  | 0.00000  |
| C13 | 0.00139        | 0.23500  | 0.00000  | 0.07886        | 0.17595  | 0.00000  |
| C14 | 0.38286        | -1.11798 | 0.00000  | 0.42438        | -1.20670 | 0.00000  |
| C15 | -1.36951       | 0.54914  | 0.00000  | -1.30762       | 0.52274  | 0.00000  |
| C16 | -2.32918       | -0.45645 | 0.00000  | -2.27393       | -0.45398 | 0.00000  |
| C17 | -0.57674       | -2.12624 | 0.00000  | -0.54833       | -2.17229 | 0.00000  |
| C18 | -1.94288       | -1.80514 | 0.00000  | -1.92806       | -1.82276 | 0.00000  |
| H19 | -1.69163       | 1.58579  | 0.00000  | -1.61683       | 1.56369  | 0.00000  |
| H20 | -3.38684       | -0.21560 | 0.00000  | -3.32642       | -0.19218 | 0.00000  |
| H21 | 1.43814        | -1.36660 | 0.00000  | 1.47058        | -1.49256 | 0.00000  |
| H22 | -0.27062       | -3.16605 | 0.00000  | -0.27273       | -3.22004 | 0.00000  |
| C23 | -3.01177       | -2.84059 | 0.00000  | -2.99460       | -2.80675 | 0.00000  |
| O24 | -2.51778       | -4.10139 | 0.00000  | -2.53730       | -4.09254 | 0.00000  |
| O25 | -4.20647       | -2.60034 | 0.00000  | -4.19506       | -2.56184 | 0.00000  |
| C26 | -3.49630       | -5.15610 | 0.00000  | -3.54501       | -5.09670 | 0.00000  |
| H27 | -4.12670       | -5.09183 | 0.89025  | -4.17774       | -5.01303 | 0.88700  |
| H28 | -4.12670       | -5.09183 | -0.89025 | -4.17774       | -5.01303 | -0.88700 |
| H29 | -2.92260       | -6.08264 | 0.00000  | -3.01432       | -6.04886 | 0.00000  |

**Table SVIII.** Cartesian Coordinates (in Å) of **1g** at  $(S_0)_{\min}$  and  $(S_1)_{\min}$  in Dichloromethane.

|     | $(S_0)_{\min}$ |          |          | $(S_1)_{\min}$ |          |          |
|-----|----------------|----------|----------|----------------|----------|----------|
|     | $x$            | $y$      | $z$      | $x$            | $y$      | $z$      |
| N1  | 2.97915        | 2.15213  | 0.00000  | 2.98337        | 2.17298  | 0.00000  |
| N2  | 2.35552        | 0.96292  | 0.00000  | 2.39958        | 0.95020  | 0.00000  |
| N3  | 2.10187        | 3.20941  | 0.00000  | 2.08278        | 3.17926  | 0.00000  |
| C4  | 4.25911        | 2.62195  | 0.00000  | 4.23202        | 2.67159  | 0.00000  |
| C5  | 4.16609        | 4.01752  | 0.00000  | 4.11182        | 4.07191  | 0.00000  |
| C6  | 2.81577        | 4.37685  | 0.00000  | 2.76558        | 4.37775  | 0.00000  |
| C7  | 0.83316        | 2.66597  | 0.00000  | 0.85013        | 2.62620  | 0.00000  |
| C8  | 1.02871        | 1.28750  | 0.00000  | 1.07241        | 1.19816  | 0.00000  |
| H9  | 5.09790        | 1.94659  | 0.00000  | 5.09184        | 2.02182  | 0.00000  |
| H10 | 5.00001        | 4.70334  | 0.00000  | 4.92755        | 4.77665  | 0.00000  |
| H11 | 2.32236        | 5.33443  | 0.00000  | 2.23506        | 5.31580  | 0.00000  |
| H12 | -0.04514       | 3.28723  | 0.00000  | -0.04384       | 3.22578  | 0.00000  |
| C13 | 0.00442        | 0.23315  | 0.00000  | 0.07363        | 0.19136  | 0.00000  |
| C14 | 0.37892        | -1.12262 | 0.00000  | 0.41434        | -1.19797 | 0.00000  |
| C15 | -1.36616       | 0.55287  | 0.00000  | -1.31677       | 0.53449  | 0.00000  |
| C16 | -2.32924       | -0.44972 | 0.00000  | -2.28210       | -0.44040 | 0.00000  |
| C17 | -0.58435       | -2.12757 | 0.00000  | -0.55755       | -2.16249 | 0.00000  |
| C18 | -1.95020       | -1.80148 | 0.00000  | -1.94177       | -1.81740 | 0.00000  |
| H19 | -1.68464       | 1.58996  | 0.00000  | -1.62339       | 1.57543  | 0.00000  |
| H20 | -3.38369       | -0.19604 | 0.00000  | -3.33136       | -0.16555 | 0.00000  |
| H21 | 1.43152        | -1.38189 | 0.00000  | 1.46023        | -1.48493 | 0.00000  |
| H22 | -0.27792       | -3.16712 | 0.00000  | -0.27556       | -3.20891 | 0.00000  |
| C23 | -3.01780       | -2.83704 | 0.00000  | -2.99620       | -2.80301 | 0.00000  |
| O24 | -2.52833       | -4.09265 | 0.00000  | -2.53936       | -4.08662 | 0.00000  |
| O25 | -4.21663       | -2.59274 | 0.00000  | -4.20707       | -2.56498 | 0.00000  |
| C26 | -3.49697       | -5.16249 | 0.00000  | -3.53388       | -5.10944 | 0.00000  |
| H27 | -4.12327       | -5.10667 | 0.89287  | -4.16390       | -5.03948 | 0.88940  |
| H28 | -4.12327       | -5.10667 | -0.89287 | -4.16390       | -5.03948 | -0.88940 |
| H29 | -2.91103       | -6.08035 | 0.00000  | -2.98780       | -6.05196 | 0.00000  |



**Table SIX.** Cartesian Coordinates (in Å) of **1e** at  $(S_0)_{\min}$  and  $(S_1)_{\min}$  in the Gas Phase.

|     | $(S_0)_{\min}$ |          |          | $(S_1)_{\min}$ |          |          |
|-----|----------------|----------|----------|----------------|----------|----------|
|     | $x$            | $y$      | $z$      | $x$            | $y$      | $z$      |
| N1  | 0.58409        | 3.63624  | 0.00000  | 0.55370        | 3.65758  | 0.00000  |
| N2  | 1.01971        | 2.37408  | 0.00000  | 1.03791        | 2.41129  | 0.00000  |
| N3  | -0.78754       | 3.72379  | 0.00000  | -0.78718       | 3.69241  | 0.00000  |
| C4  | 1.11989        | 4.88983  | 0.00000  | 1.05222        | 4.92187  | 0.00000  |
| C5  | 0.04081        | 5.77925  | 0.00000  | -0.04233       | 5.78668  | 0.00000  |
| C6  | -1.14696       | 5.04558  | 0.00000  | -1.19032       | 5.00683  | 0.00000  |
| C7  | -1.26392       | 2.43135  | 0.00000  | -1.22294       | 2.40253  | 0.00000  |
| C8  | -0.12492       | 1.62572  | 0.00000  | -0.04151       | 1.60006  | 0.00000  |
| H9  | 2.18660        | 5.03409  | 0.00000  | 2.11620        | 5.09126  | 0.00000  |
| H10 | 0.11436        | 6.85629  | 0.00000  | -0.00321       | 6.86408  | 0.00000  |
| H11 | -2.18160       | 5.34484  | 0.00000  | -2.23675       | 5.26433  | 0.00000  |
| H12 | -2.31717       | 2.21947  | 0.00000  | -2.26842       | 2.14428  | 0.00000  |
| C13 | 0.00106        | 0.15998  | 0.00000  | 0.08710        | 0.16581  | 0.00000  |
| C14 | 1.29339        | -0.39728 | 0.00000  | 1.37492        | -0.42207 | 0.00000  |
| C15 | -1.09740       | -0.74078 | 0.00000  | -1.05603       | -0.72554 | 0.00000  |
| C16 | -0.88606       | -2.12790 | 0.00000  | -0.84238       | -2.10533 | 0.00000  |
| C17 | 1.49856        | -1.77113 | 0.00000  | 1.56079        | -1.77638 | 0.00000  |
| C18 | 0.40631        | -2.65239 | 0.00000  | 0.43058        | -2.65229 | 0.00000  |
| H19 | -1.73252       | -2.80555 | 0.00000  | -1.69173       | -2.77991 | 0.00000  |
| H20 | 2.14003        | 0.27829  | 0.00000  | 2.23937        | 0.23269  | 0.00000  |
| H21 | 2.50732        | -2.16746 | 0.00000  | 2.55834        | -2.19593 | 0.00000  |
| C22 | 0.55994        | -4.13545 | 0.00000  | 0.54564        | -4.11037 | 0.00000  |
| O23 | 1.85495        | -4.51944 | 0.00000  | 1.83698        | -4.52886 | 0.00000  |
| O24 | -0.36980       | -4.92089 | 0.00000  | -0.38368       | -4.89647 | 0.00000  |
| C25 | 2.08637        | -5.94195 | 0.00000  | 2.00569        | -5.94018 | 0.00000  |
| H26 | 1.64759        | -6.39742 | 0.89073  | 1.54868        | -6.38701 | 0.88639  |
| H27 | 1.64759        | -6.39742 | -0.89073 | 1.54868        | -6.38701 | -0.88639 |
| H28 | 3.16965        | -6.05748 | 0.00000  | 3.08232        | -6.11220 | 0.00000  |
| C29 | -2.46078       | -0.29680 | 0.00000  | -2.39475       | -0.26543 | 0.00000  |
| N30 | -3.57618       | 0.03670  | 0.00000  | -3.48452       | 0.14942  | 0.00000  |

**Table SX.** Cartesian Coordinates (in Å) of **1e** at  $(S_0)_{\min}$  and  $(S_1)_{\min}$  in Dichloromethane.

|     | $(S_0)_{\min}$ |          |          | $(S_1)_{\min}$ |          |          |
|-----|----------------|----------|----------|----------------|----------|----------|
|     | <i>x</i>       | <i>y</i> | <i>z</i> | <i>x</i>       | <i>y</i> | <i>z</i> |
| N1  | 0.58923        | 3.64112  | 0.00000  | 0.57044        | 3.65901  | 0.00000  |
| N2  | 1.02534        | 2.37528  | 0.00000  | 1.04783        | 2.39973  | 0.00000  |
| N3  | -0.78244       | 3.72744  | 0.00000  | -0.77484       | 3.70035  | 0.00000  |
| C4  | 1.12386        | 4.89404  | 0.00000  | 1.07219        | 4.91120  | 0.00000  |
| C5  | 0.04274        | 5.78281  | 0.00000  | -0.02366       | 5.78555  | 0.00000  |
| C6  | -1.14399       | 5.04759  | 0.00000  | -1.17351       | 5.01800  | 0.00000  |
| C7  | -1.25923       | 2.43447  | 0.00000  | -1.22353       | 2.42127  | 0.00000  |
| C8  | -0.12267       | 1.62771  | 0.00000  | -0.04321       | 1.60437  | 0.00000  |
| H9  | 2.19041        | 5.04268  | 0.00000  | 2.13590        | 5.08498  | 0.00000  |
| H10 | 0.11541        | 6.86003  | 0.00000  | 0.02544        | 6.86233  | 0.00000  |
| H11 | -2.17962       | 5.34411  | 0.00000  | -2.21880       | 5.28038  | 0.00000  |
| H12 | -2.31357       | 2.23001  | 0.00000  | -2.27312       | 2.18543  | 0.00000  |
| C13 | -0.00060       | 0.16211  | 0.00000  | 0.06516        | 0.17869  | 0.00000  |
| C14 | 1.28943        | -0.40098 | 0.00000  | 1.35718        | -0.42028 | 0.00000  |
| C15 | -1.09981       | -0.73869 | 0.00000  | -1.07325       | -0.72109 | 0.00000  |
| C16 | -0.89221       | -2.12683 | 0.00000  | -0.86199       | -2.10284 | 0.00000  |
| C17 | 1.49192        | -1.77524 | 0.00000  | 1.54077        | -1.77418 | 0.00000  |
| C18 | 0.39824        | -2.65526 | 0.00000  | 0.41116        | -2.65588 | 0.00000  |
| H19 | -1.74280       | -2.79854 | 0.00000  | -1.71788       | -2.76895 | 0.00000  |
| H20 | 2.14152        | 0.26708  | 0.00000  | 2.22262        | 0.23220  | 0.00000  |
| H21 | 2.50139        | -2.16918 | 0.00000  | 2.54119        | -2.18768 | 0.00000  |
| C22 | 0.55374        | -4.13814 | 0.00000  | 0.53673        | -4.10978 | 0.00000  |
| O23 | 1.84182        | -4.52009 | 0.00000  | 1.82220        | -4.52502 | 0.00000  |
| O24 | -0.38178       | -4.92359 | 0.00000  | -0.39640       | -4.90571 | 0.00000  |
| C25 | 2.09344        | -5.94327 | 0.00000  | 2.03187        | -5.93993 | 0.00000  |
| H26 | 1.66421        | -6.40143 | 0.89318  | 1.59190        | -6.39299 | 0.89033  |
| H27 | 1.66421        | -6.40143 | -0.89318 | 1.59190        | -6.39299 | -0.89033 |
| H28 | 3.17758        | -6.04234 | 0.00000  | 3.11192        | -6.07635 | 0.00000  |
| C29 | -2.46497       | -0.30282 | 0.00000  | -2.42252       | -0.28909 | 0.00000  |
| N30 | -3.58739       | 0.00747  | 0.00000  | -3.54028       | 0.04541  | 0.00000  |

**Table SXI.** Cartesian Coordinates (in Å) of **1f** at  $(S_0)_{\min}$  and  $(S_1)_{\min}$  in the Gas Phase.

|     | $(S_0)_{\min}$ |          |          | $(S_1)_{\min}$ |          |          |
|-----|----------------|----------|----------|----------------|----------|----------|
|     | <i>x</i>       | <i>y</i> | <i>z</i> | <i>x</i>       | <i>y</i> | <i>z</i> |
| N1  | -3.44266       | 0.73344  | 0.20872  | -3.45529       | 0.75270  | 0.12262  |
| N2  | -2.33662       | -0.00988 | 0.31504  | -2.37410       | -0.02530 | 0.18583  |
| N3  | -3.17720       | 2.03723  | -0.14794 | -3.15211       | 2.04982  | -0.05050 |
| C4  | -4.78609       | 0.56917  | 0.36509  | -4.80391       | 0.59514  | 0.20214  |
| C5  | -5.36862       | 1.81003  | 0.09288  | -5.36299       | 1.86430  | 0.07362  |
| C6  | -4.36014       | 2.72184  | -0.22626 | -4.32054       | 2.76902  | -0.08066 |
| C7  | -1.80967       | 2.13409  | -0.28116 | -1.79399       | 2.12524  | -0.16369 |
| C8  | -1.33396       | 0.85746  | 0.00775  | -1.32449       | 0.79760  | -0.00448 |
| H9  | -5.19511       | -0.38830 | 0.63862  | -5.23232       | -0.38408 | 0.33983  |
| H10 | -6.42557       | 2.02765  | 0.12246  | -6.41426       | 2.10238  | 0.09616  |
| H11 | -4.38726       | 3.76570  | -0.49026 | -4.31000       | 3.83966  | -0.20394 |
| H12 | -1.32497       | 3.05380  | -0.55561 | -1.28068       | 3.05982  | -0.30863 |
| C13 | 0.05449        | 0.37855  | -0.00458 | 0.03889        | 0.31672  | -0.00459 |
| C14 | 0.37682        | -0.90628 | -0.50781 | 0.38692        | -0.99505 | -0.47572 |
| C15 | 1.12195        | 1.16571  | 0.49653  | 1.12987        | 1.15268  | 0.44622  |
| C16 | 2.43878        | 0.68766  | 0.50226  | 2.42930        | 0.67864  | 0.44859  |
| C17 | 1.69695        | -1.38049 | -0.48633 | 1.69130        | -1.43716 | -0.46445 |
| C18 | 2.73002        | -0.58878 | 0.01937  | 2.73961        | -0.61162 | 0.00679  |
| H19 | 3.24149        | 1.30195  | 0.89465  | 3.23798        | 1.30924  | 0.80070  |
| H20 | 1.91267        | -2.36612 | -0.88022 | 1.92133        | -2.42804 | -0.83442 |
| C21 | 4.15155        | -1.05011 | 0.06028  | 4.13613        | -1.03653 | 0.03902  |
| O22 | 4.29854        | -2.29679 | -0.42616 | 4.30587        | -2.30242 | -0.41442 |
| O23 | 5.06925        | -0.37497 | 0.48480  | 5.06780        | -0.35466 | 0.42453  |
| C24 | 5.64340        | -2.82169 | -0.42329 | 5.65070        | -2.76686 | -0.40454 |
| H25 | 6.29444        | -2.19311 | -1.03465 | 6.28235        | -2.13951 | -1.03791 |
| H26 | 6.03036        | -2.86030 | 0.59724  | 6.05689        | -2.75690 | 0.60963  |
| H27 | 5.56126        | -3.82216 | -0.84559 | 5.61625        | -3.78537 | -0.79100 |
| C28 | 0.89817        | 2.47753  | 1.03841  | 0.89482        | 2.47043  | 0.92585  |
| N29 | 0.77768        | 3.54846  | 1.47675  | 0.64766        | 3.54982  | 1.28122  |
| C30 | -0.60076       | -1.76408 | -1.12232 | -0.59037       | -1.87863 | -1.03798 |
| N31 | -1.28926       | -2.51930 | -1.67752 | -1.35869       | -2.60321 | -1.51464 |

**Table SXII.** Cartesian Coordinates (in Å) of **1f** at  $(S_0)_{\min}$  and  $(S_1)_{\min}$  in Dichloromethane.

|     | $(S_0)_{\min}$ |          |          | $(S_1)_{\min}$ |          |          |
|-----|----------------|----------|----------|----------------|----------|----------|
|     | <i>x</i>       | <i>y</i> | <i>z</i> | <i>x</i>       | <i>y</i> | <i>z</i> |
| N1  | -3.44763       | 0.75203  | 0.26158  | -3.46944       | 0.75196  | 0.12477  |
| N2  | -2.34185       | 0.00579  | 0.41168  | -2.38147       | -0.03204 | 0.21533  |
| N3  | -3.17453       | 2.01826  | -0.20446 | -3.15536       | 2.04807  | -0.06625 |
| C4  | -4.78952       | 0.61649  | 0.44942  | -4.81128       | 0.60287  | 0.17689  |
| C5  | -5.36355       | 1.83823  | 0.08218  | -5.36392       | 1.87714  | 0.00810  |
| C6  | -4.34993       | 2.70781  | -0.32518 | -4.31994       | 2.77315  | -0.14203 |
| C7  | -1.80687       | 2.09229  | -0.36331 | -1.80154       | 2.12694  | -0.15252 |
| C8  | -1.33809       | 0.84194  | 0.02020  | -1.33378       | 0.79382  | 0.03423  |
| H9  | -5.20843       | -0.30735 | 0.81102  | -5.25787       | -0.36651 | 0.32796  |
| H10 | -6.41779       | 2.06961  | 0.10818  | -6.41499       | 2.11594  | 0.00156  |
| H11 | -4.36721       | 3.72606  | -0.67640 | -4.30023       | 3.84049  | -0.29084 |
| H12 | -1.32186       | 2.97372  | -0.74412 | -1.29536       | 3.05466  | -0.35571 |
| C13 | 0.05137        | 0.36352  | 0.01656  | 0.02189        | 0.32306  | 0.03841  |
| C14 | 0.38601        | -0.90812 | -0.50716 | 0.37945        | -0.99974 | -0.41606 |
| C15 | 1.10885        | 1.14303  | 0.54436  | 1.12086        | 1.15685  | 0.47739  |
| C16 | 2.42993        | 0.67546  | 0.54328  | 2.42506        | 0.69705  | 0.45824  |
| C17 | 1.70803        | -1.37665 | -0.49376 | 1.69024        | -1.43041 | -0.42417 |
| C18 | 2.73285        | -0.58611 | 0.03034  | 2.74201        | -0.59445 | 0.01193  |
| H19 | 3.22378        | 1.28694  | 0.95622  | 3.22573        | 1.33914  | 0.80728  |
| H20 | 1.93237        | -2.35264 | -0.90583 | 1.91801        | -2.42517 | -0.78606 |
| C21 | 4.15753        | -1.04180 | 0.06200  | 4.13726        | -1.01890 | 0.01283  |
| O22 | 4.31062        | -2.27072 | -0.44752 | 4.30565        | -2.28094 | -0.43211 |
| O23 | 5.07094        | -0.36520 | 0.50342  | 5.08090        | -0.32560 | 0.37319  |
| C24 | 5.65651        | -2.80381 | -0.46245 | 5.65097        | -2.76940 | -0.46213 |
| H25 | 6.30471        | -2.16527 | -1.06534 | 6.26699        | -2.15306 | -1.11924 |
| H26 | 6.04324        | -2.87036 | 0.55606  | 6.08015        | -2.76929 | 0.54134  |
| H27 | 5.56613        | -3.79299 | -0.90712 | 5.58457        | -3.78548 | -0.84652 |
| C28 | 0.86672        | 2.42858  | 1.13857  | 0.90329        | 2.45649  | 1.01692  |
| N29 | 0.73723        | 3.47116  | 1.63857  | 0.72331        | 3.51879  | 1.45462  |
| C30 | -0.59452       | -1.75334 | -1.13253 | -0.58156       | -1.91167 | -0.95475 |
| N31 | -1.30510       | -2.48866 | -1.68728 | -1.30967       | -2.68586 | -1.42141 |





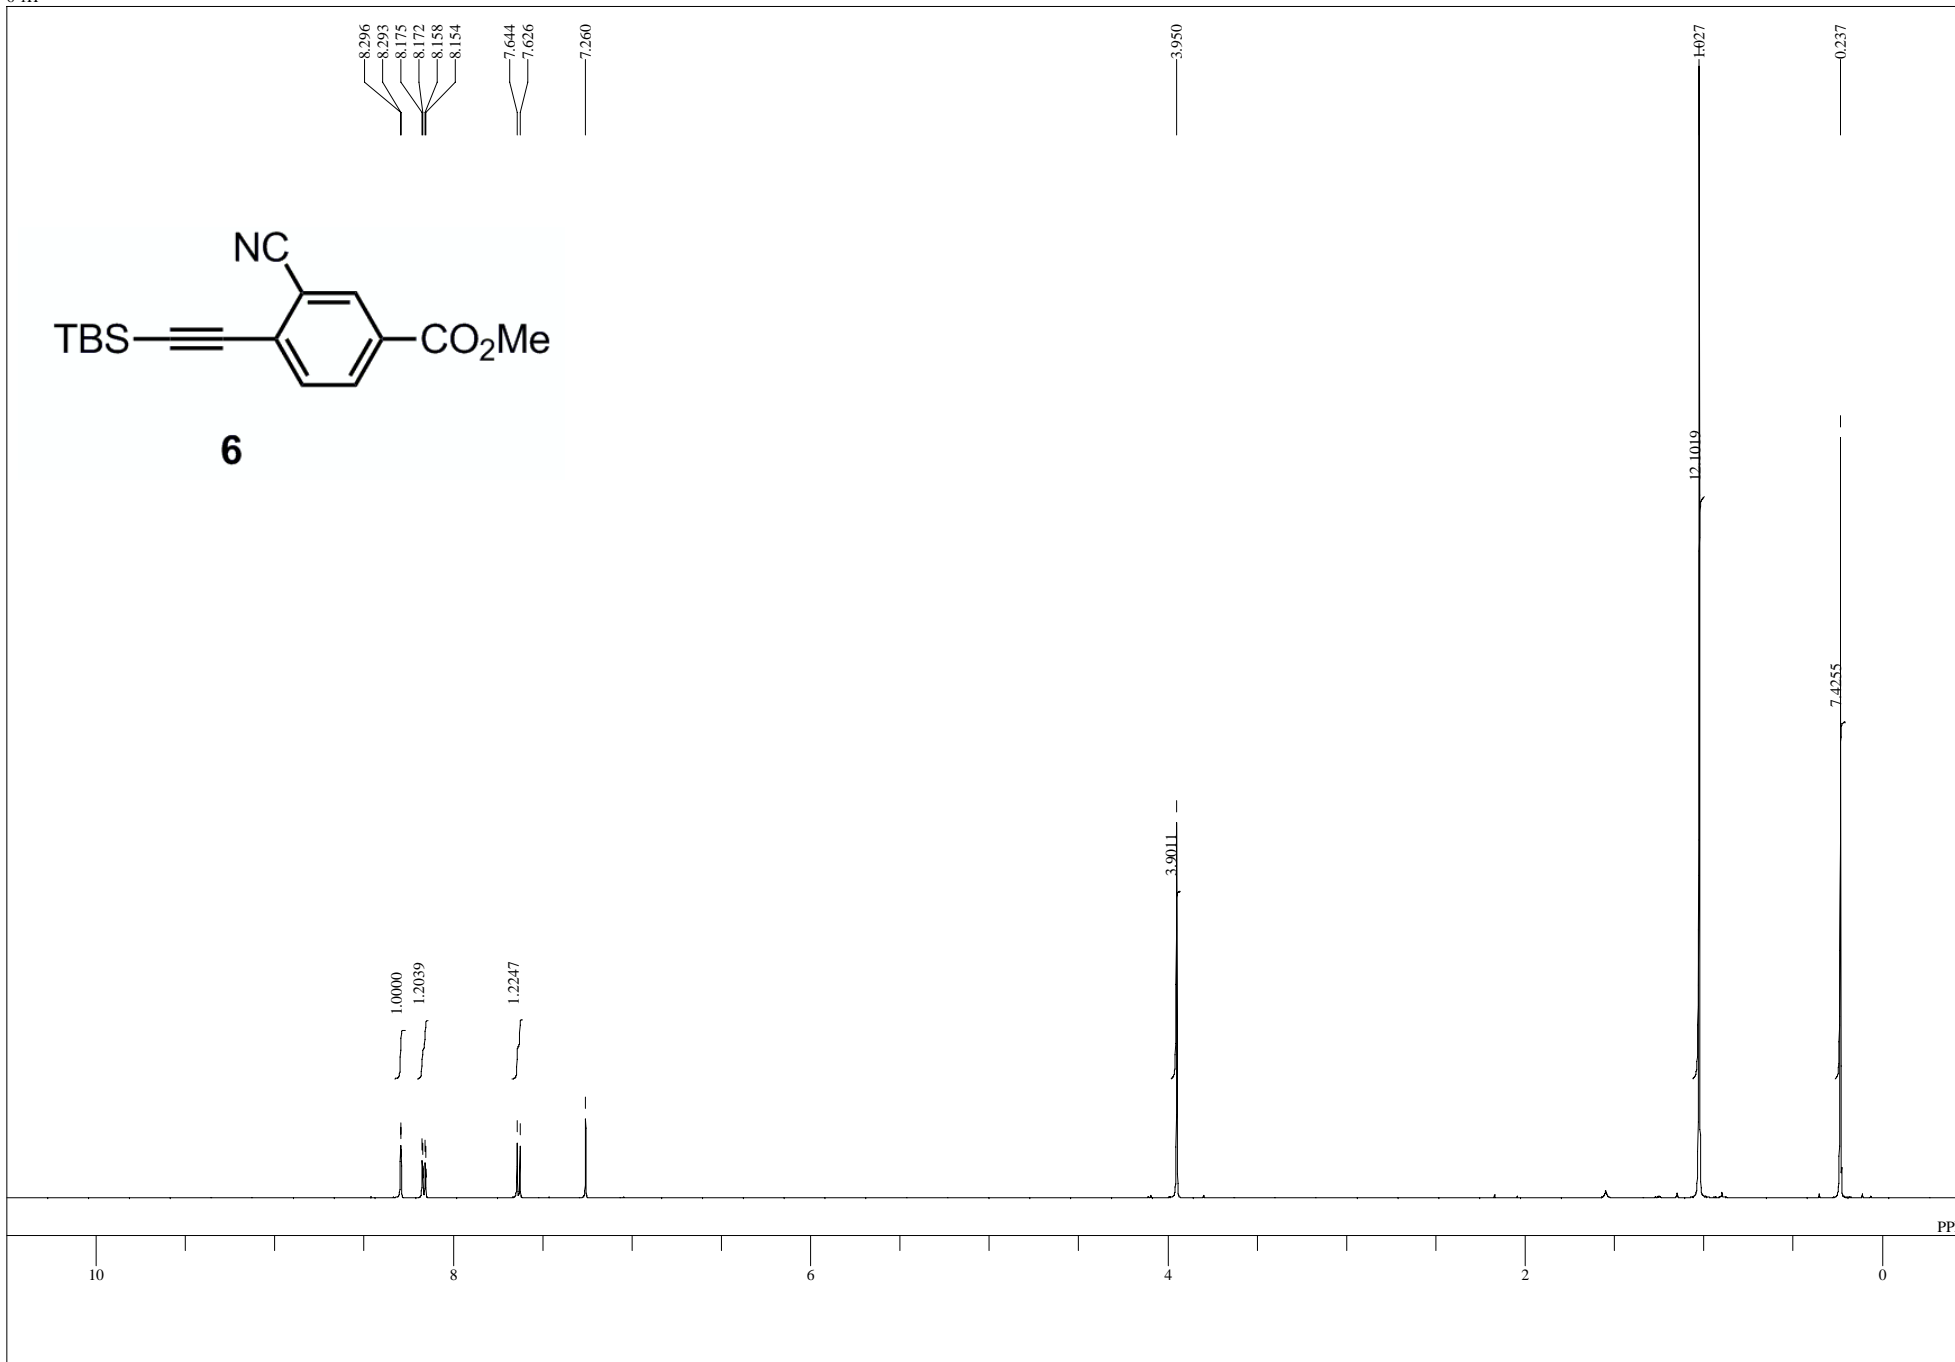

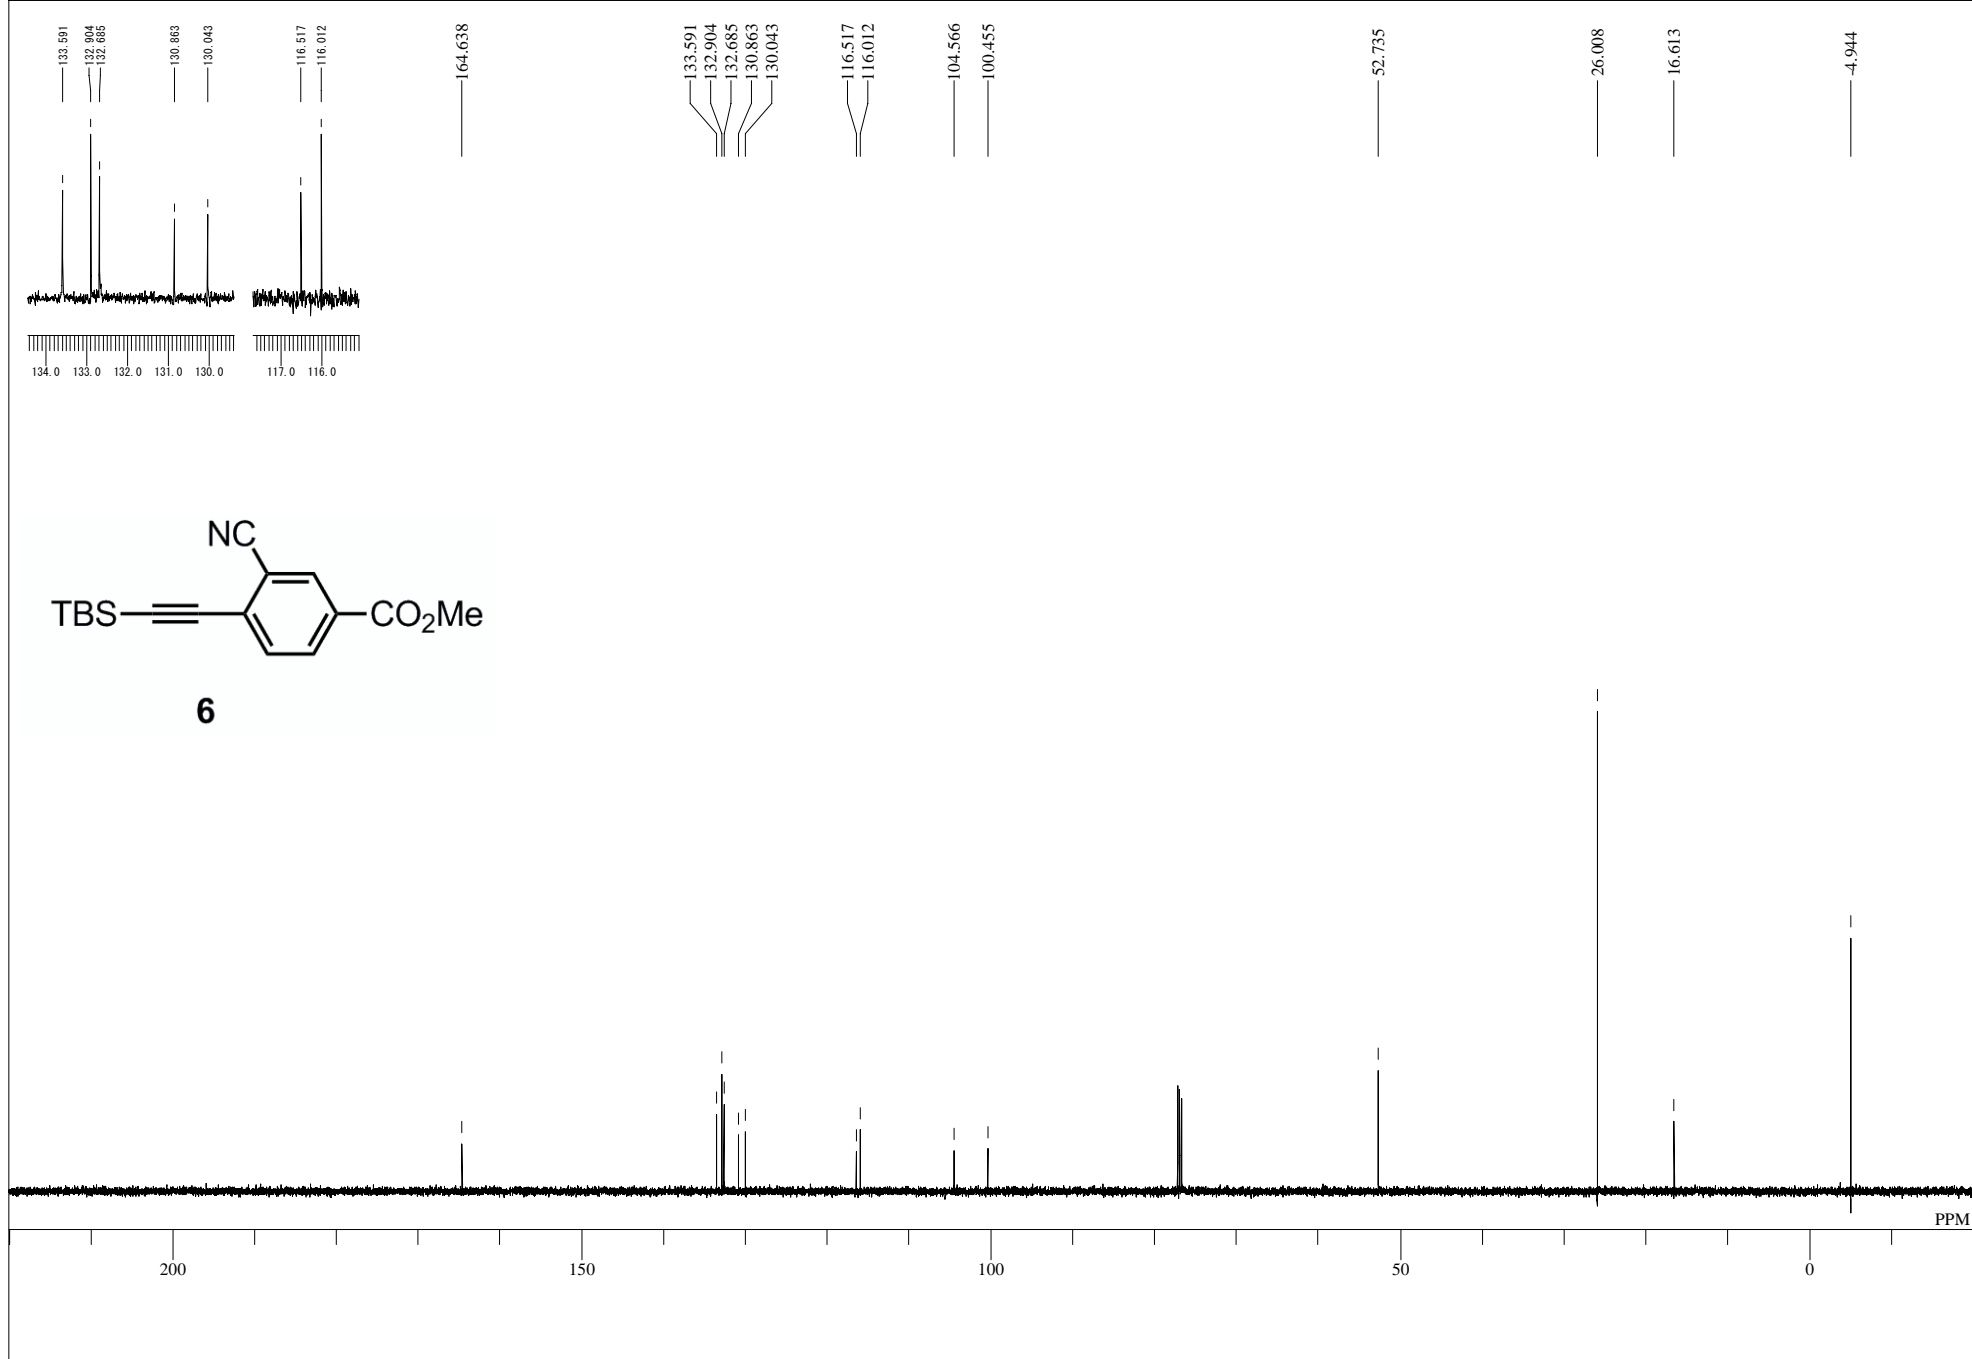



8.304  
8.301  
8.198  
8.194  
8.182  
8.178  
7.685  
7.669

3.949  
3.655

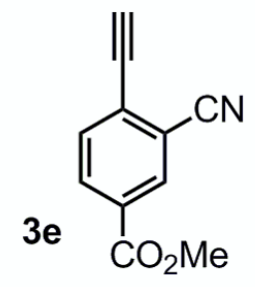

1.0000  
1.1452

1.1562

3.8570

0.9974

10

8

6

4

2

0

PPM

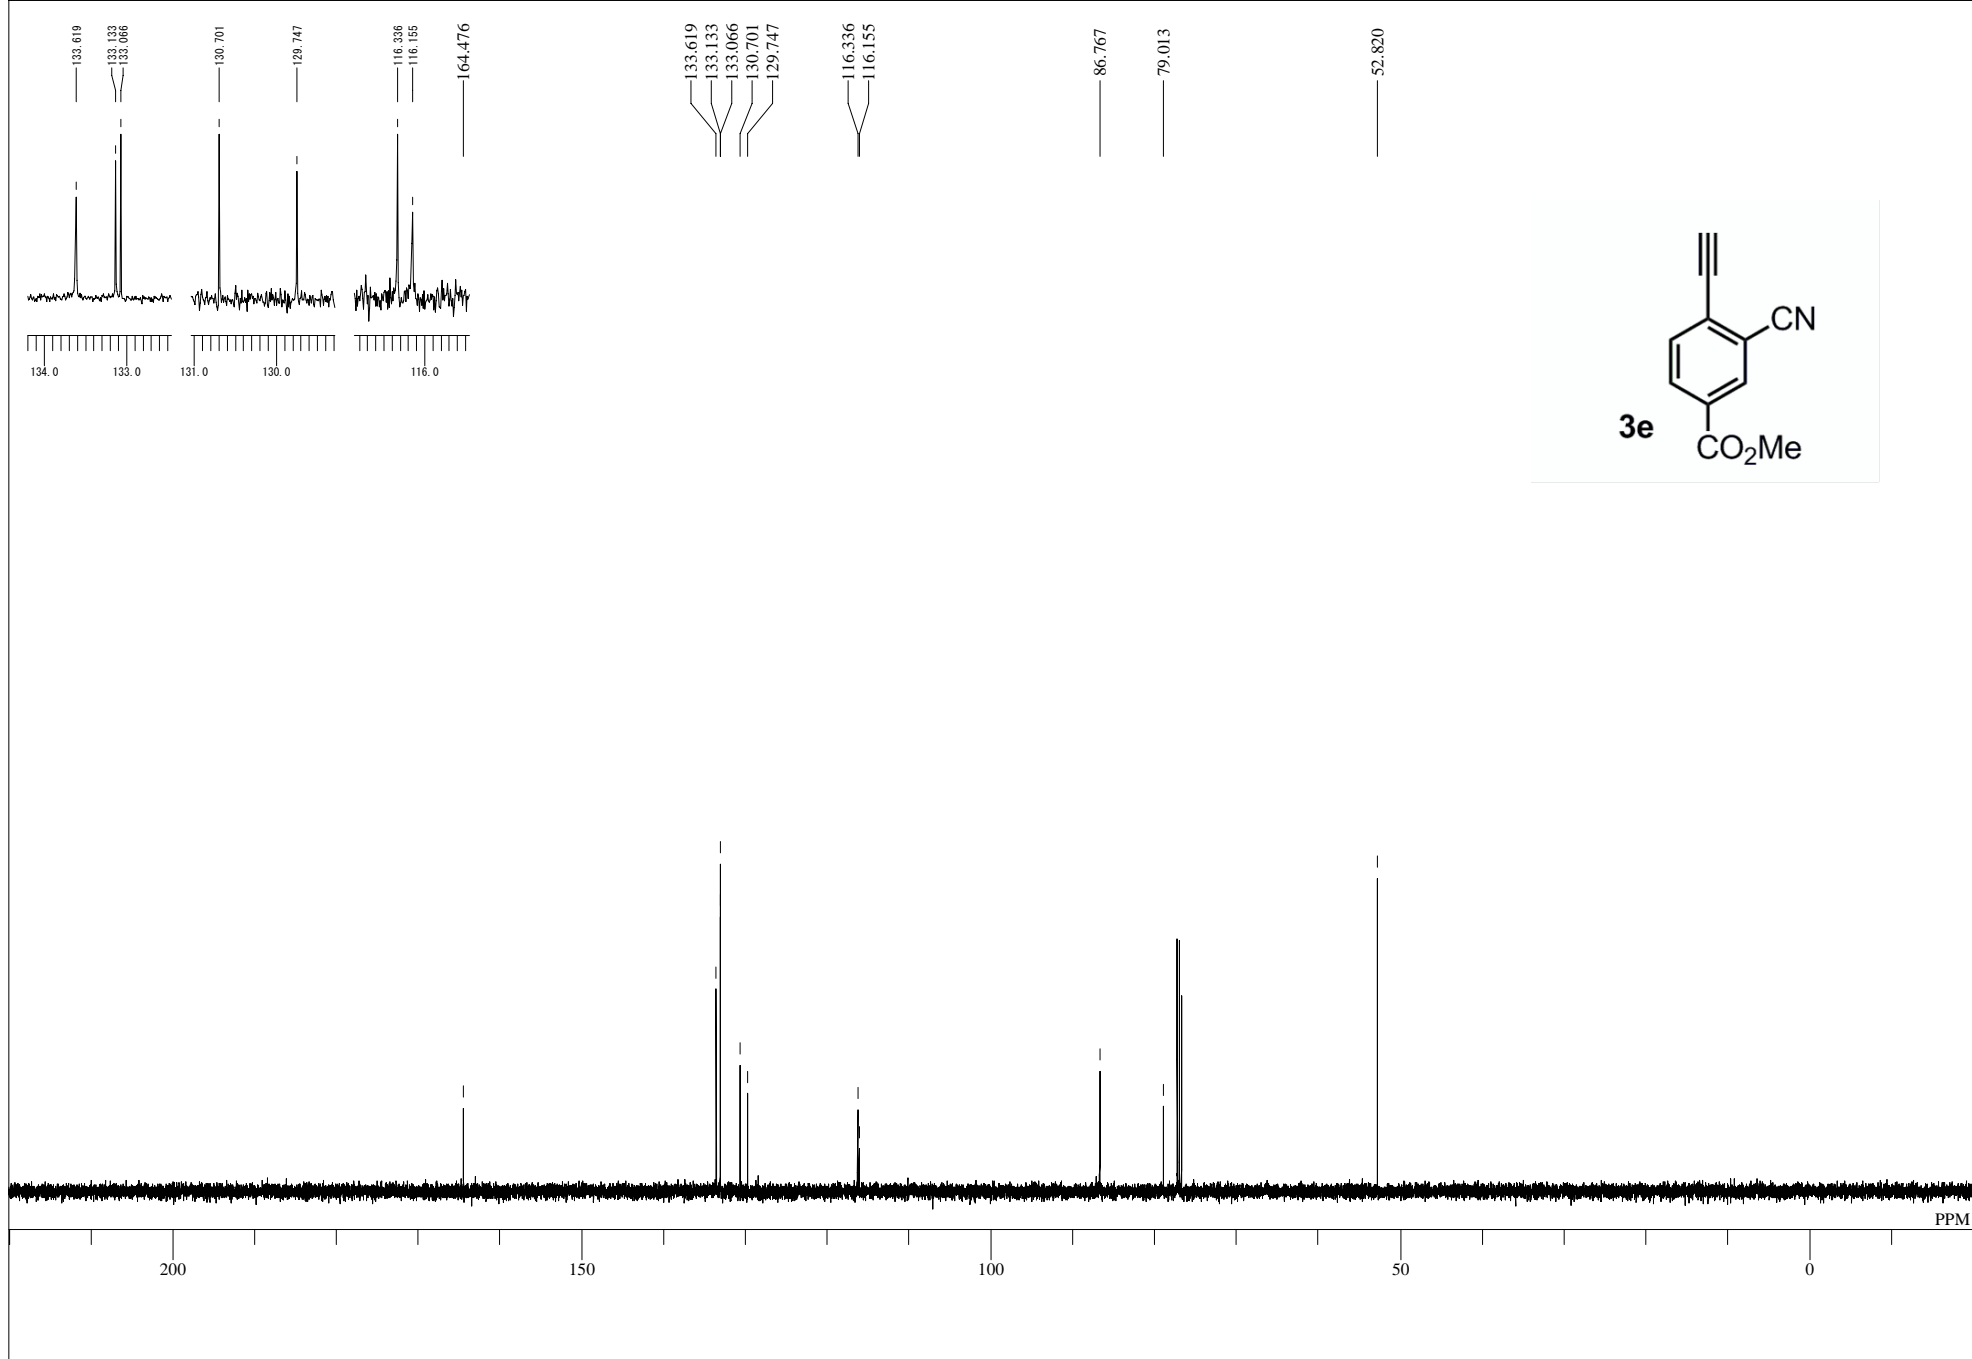

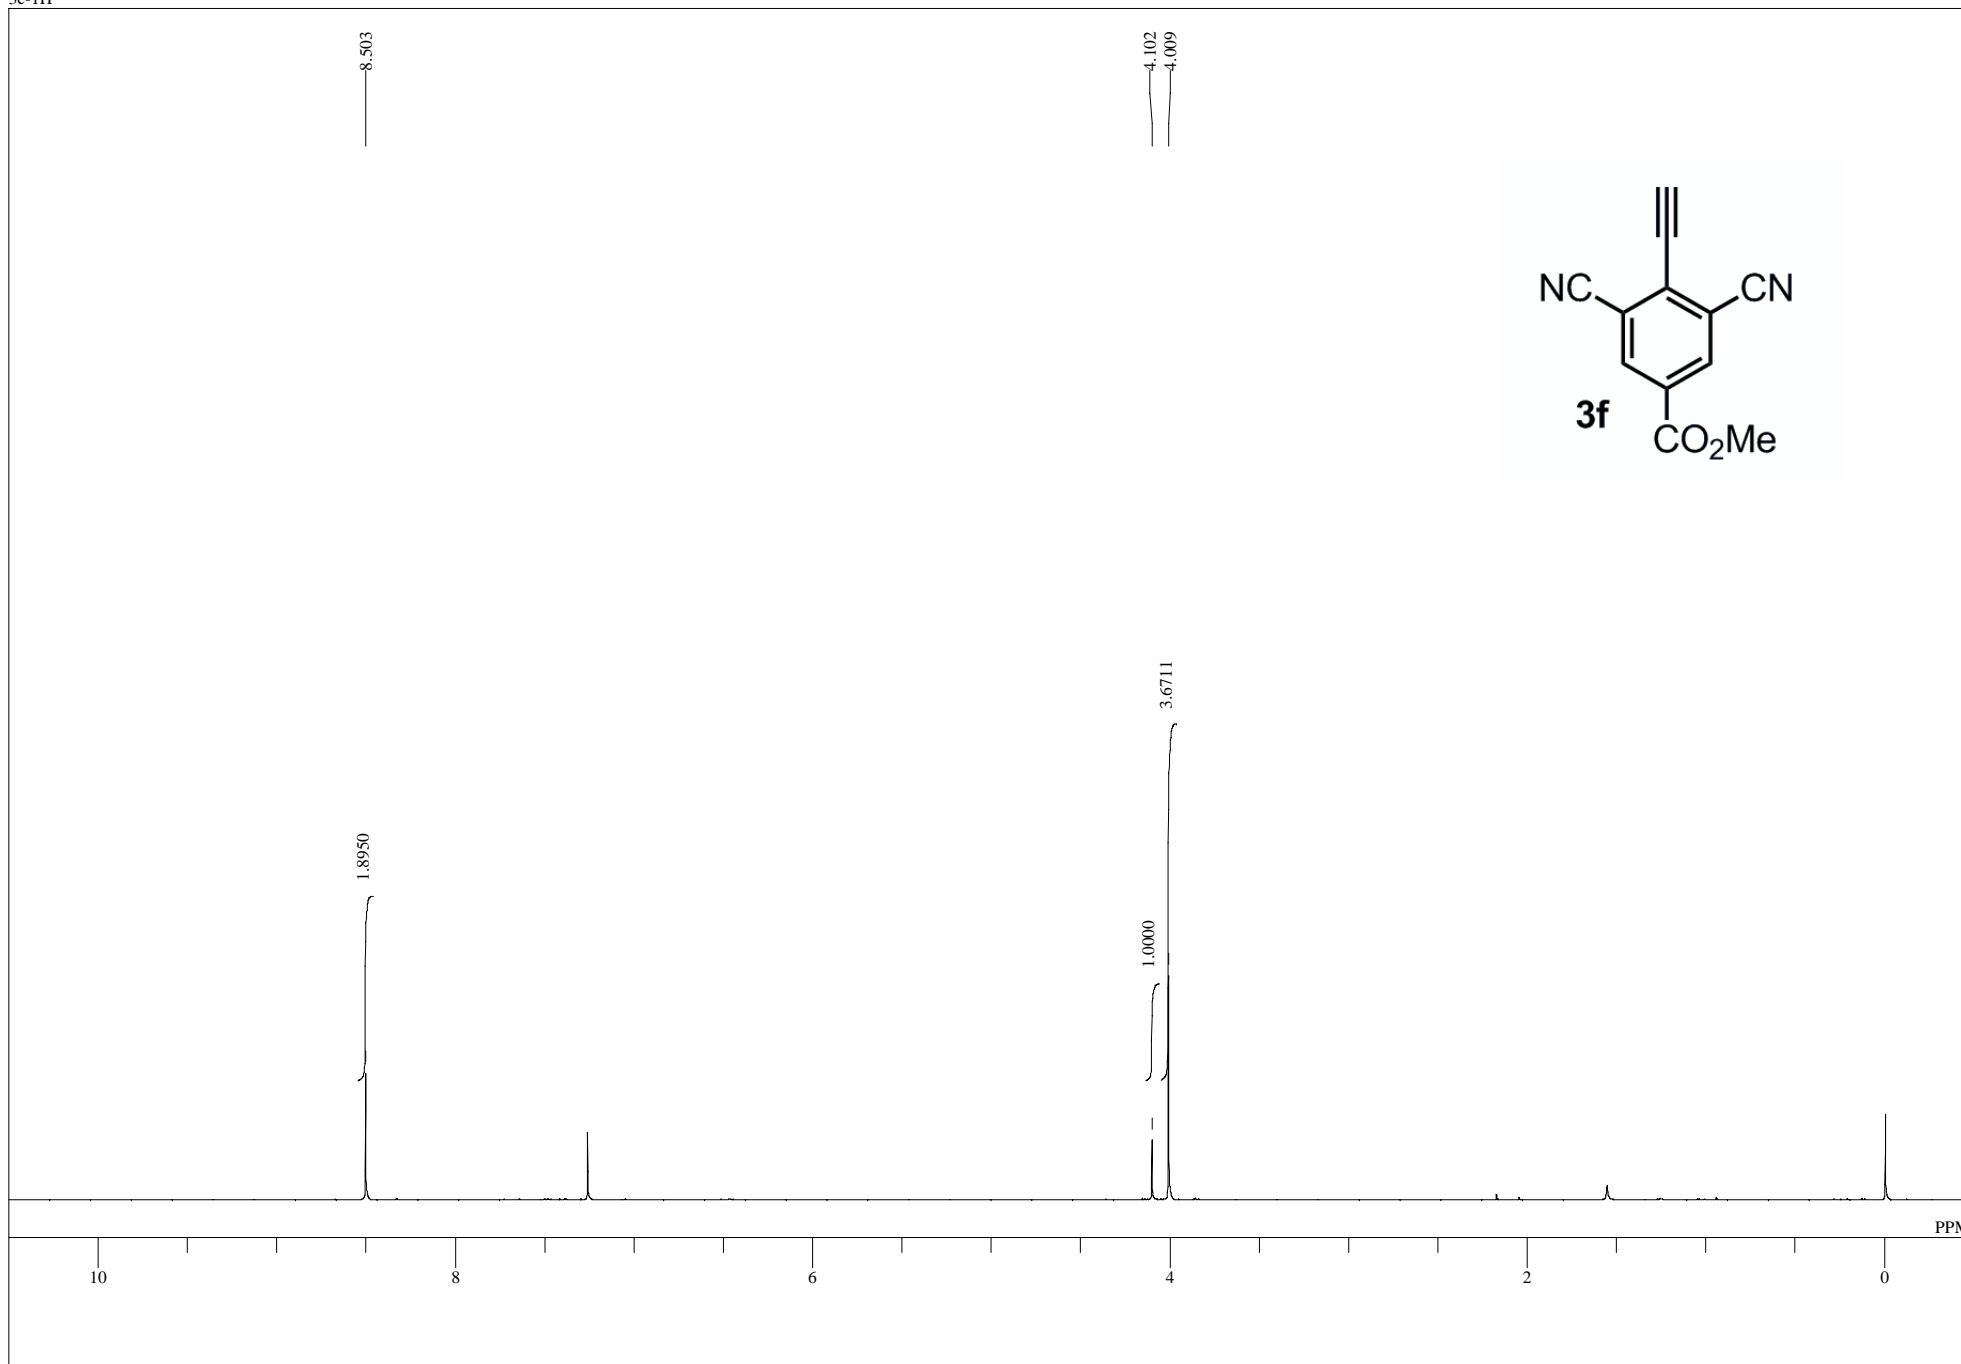

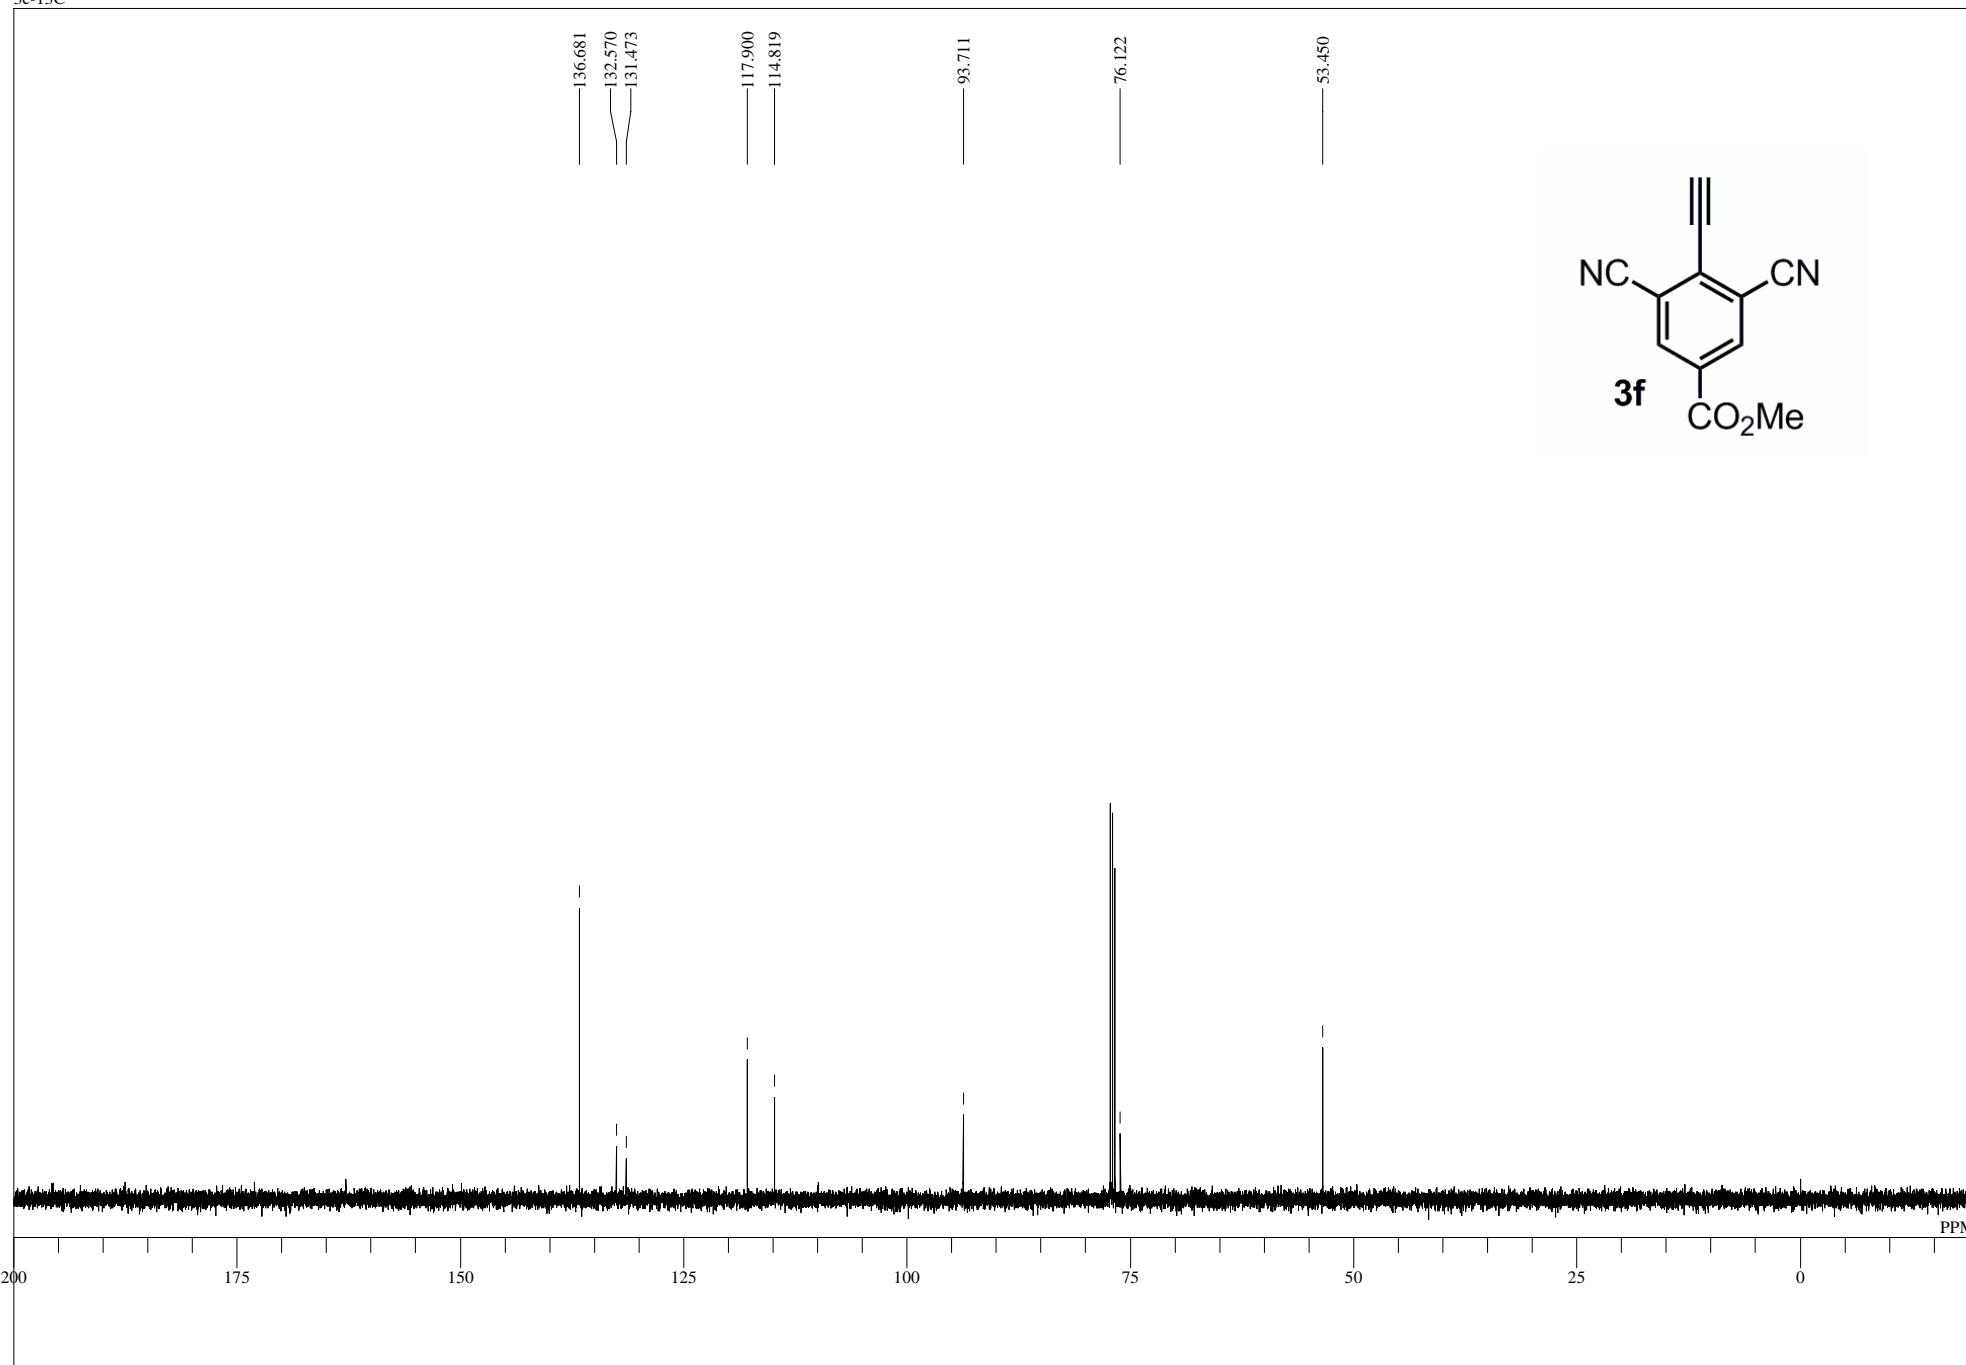

metacyano

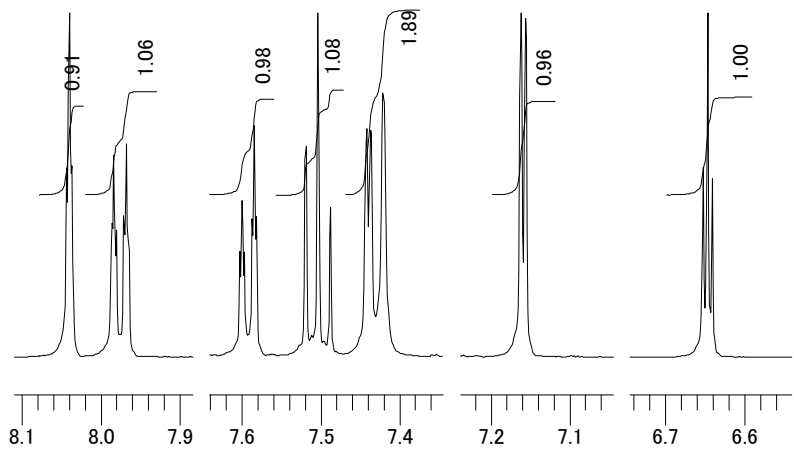

8.1 8.0 7.9 7.6 7.5 7.4 7.2 7.1 6.7 6.6

DFILE C:\Documents and Settings\All Users\Documents  
COMNT metacyano  
DATIM 07-12-2012 16:46:16  
OBNUC 1H  
EXMOD single\_pulse.ex2  
OBFRQ 500.16 MHz  
OBSET 2.41 KHz  
OBFIN 6.01 Hz  
POINT 16384  
FREQU 9384.38 Hz  
SCANS 7  
ACQTM 1.7459 sec  
PD 1.0000 sec  
PW1 6.50 usec  
IRNUC 1H  
CTEMP 19.9 c  
SLVNT CDCL3  
EXREF 0.00 ppm  
BF 0.12 Hz  
RGAIN 44

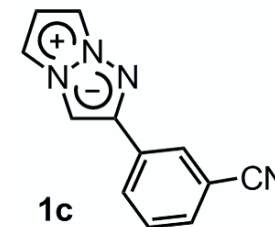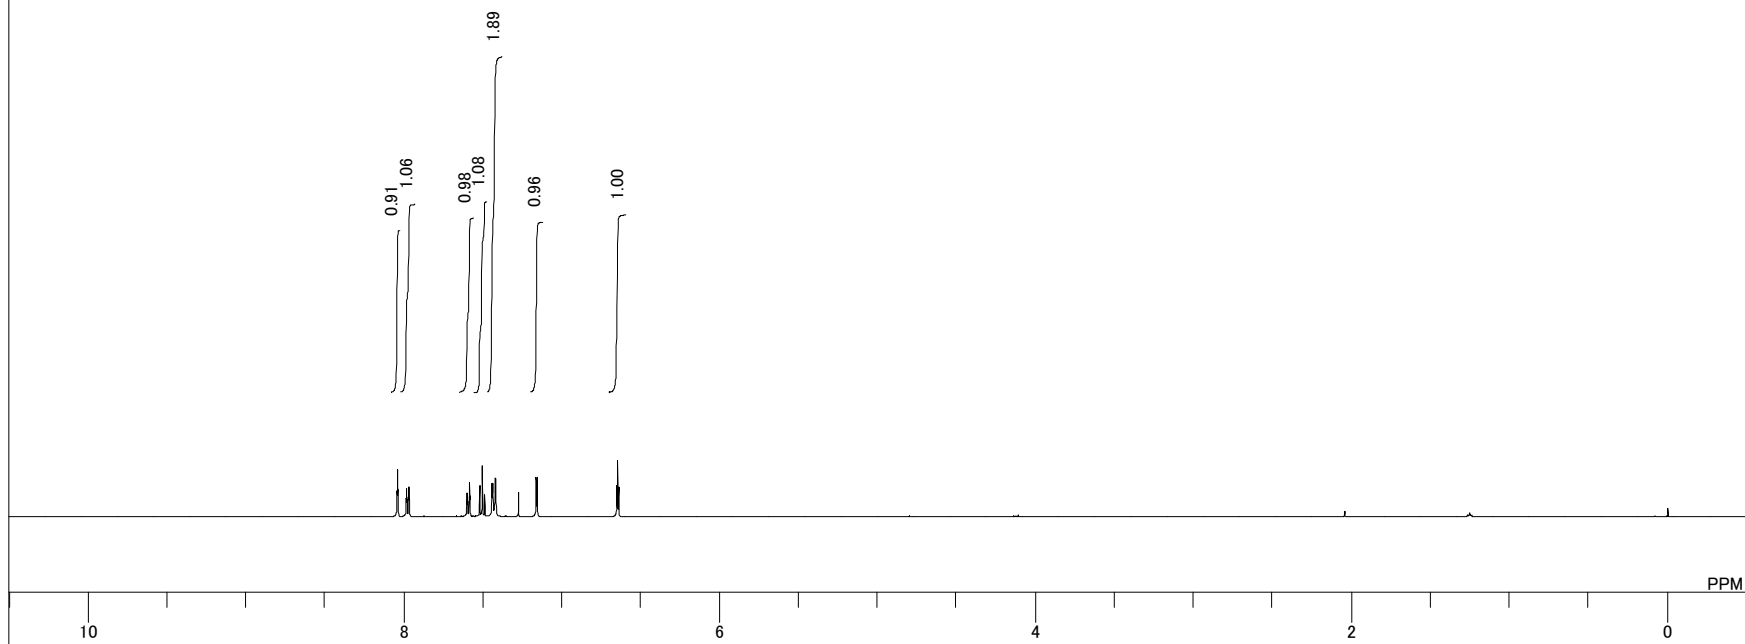

metacyano-13C

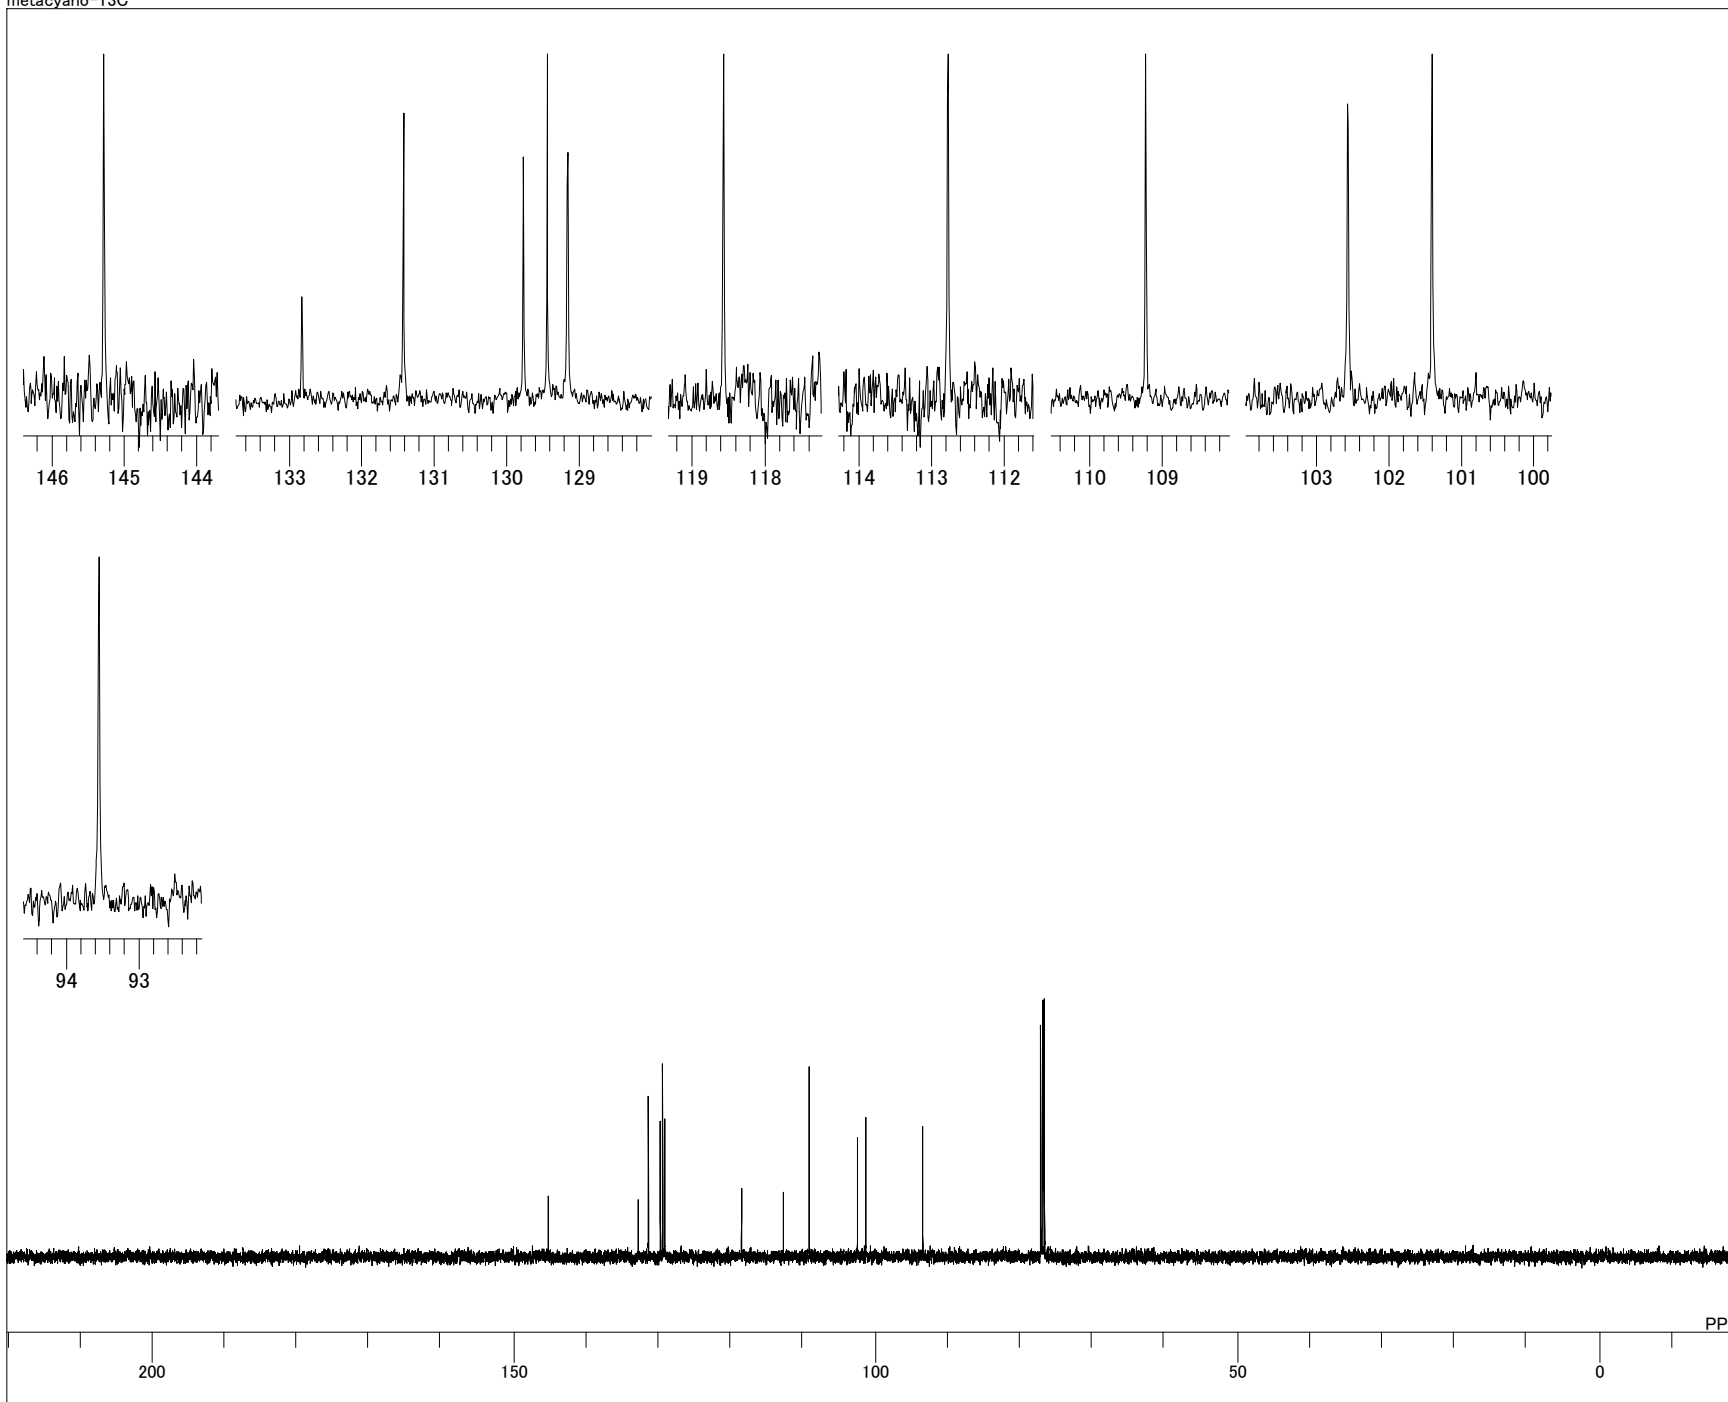

DFILE C:\Documents and Settings\All Users\Documents  
COMNT metacyano-13C  
DATIM 07-12-2012 16:49:01  
OBNUC 13C  
EXMOD single\_pulse\_dec  
OBFRQ 125.77 MHz  
OBSET 7.87 KHz  
OBFIN 4.21 Hz  
POINT 32768  
FREQU 39308.18 Hz  
SCANS 32  
ACQTM 0.8336 sec  
PD 2.0000 sec  
PW1 3.83 usec  
IRNUC 1H  
CTEMP 20.4 c  
SLVNT CDCL3  
EXREF 77.00 ppm  
BF 1.20 Hz  
RGAIN 60

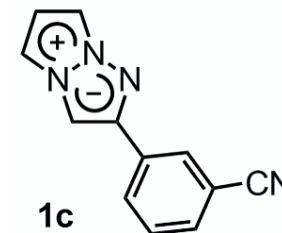

ortho-cyano-1H

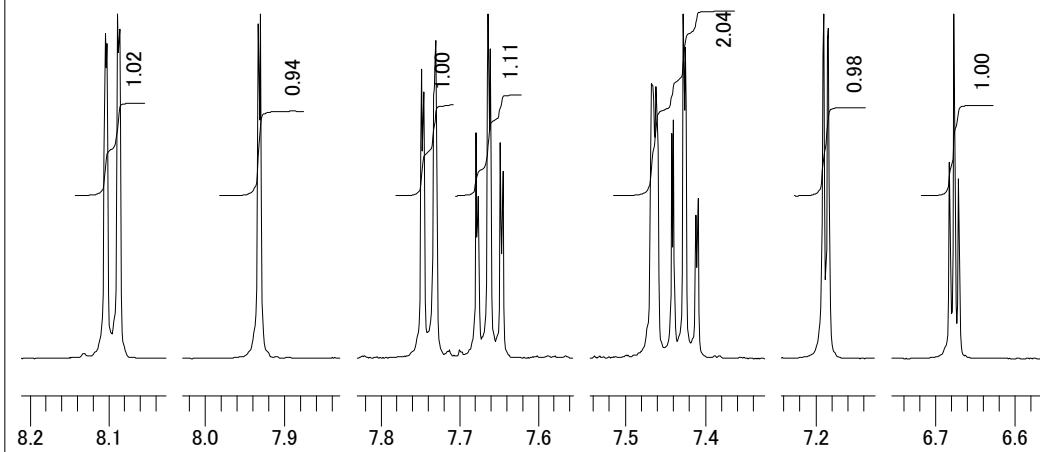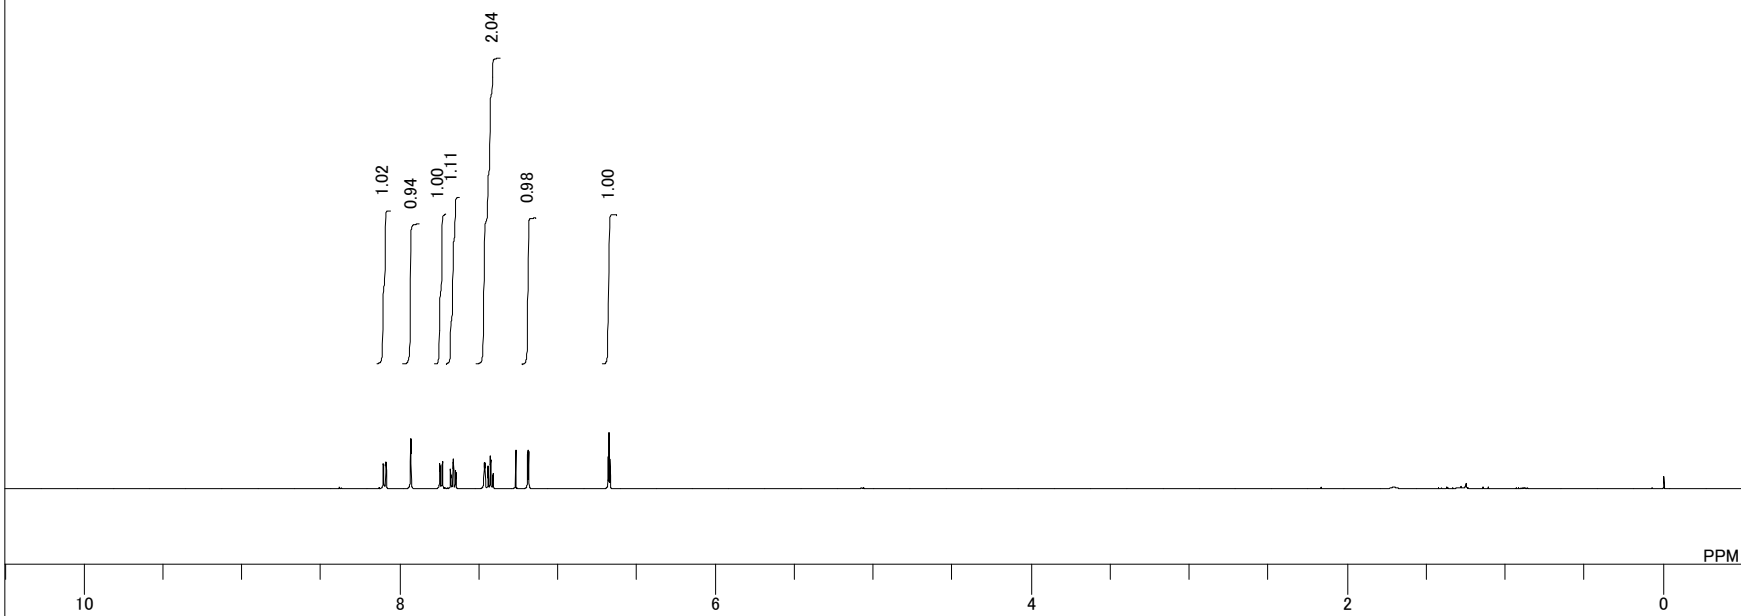

DFILE C:\Documents and Settings\All Users\Documents  
COMNT ortho-cyano-1H  
DATIM 14-12-2012 11:25:28  
OBNUC 1H  
EXMOD single\_pulse.ex2  
OBFRQ 500.16 MHz  
OBSET 2.41 KHz  
OBFIN 6.01 Hz  
POINT 16384  
FREQU 9384.38 Hz  
SCANS 8  
ACQTM 1.7459 sec  
PD 1.0000 sec  
PW1 6.50 usec  
IRNUC 1H  
CTEMP 20.5 c  
SLVNT CDCL3  
EXREF 0.00 ppm  
BF 0.12 Hz  
RGAIN 48

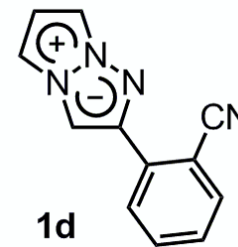

ortho-cyano-13C

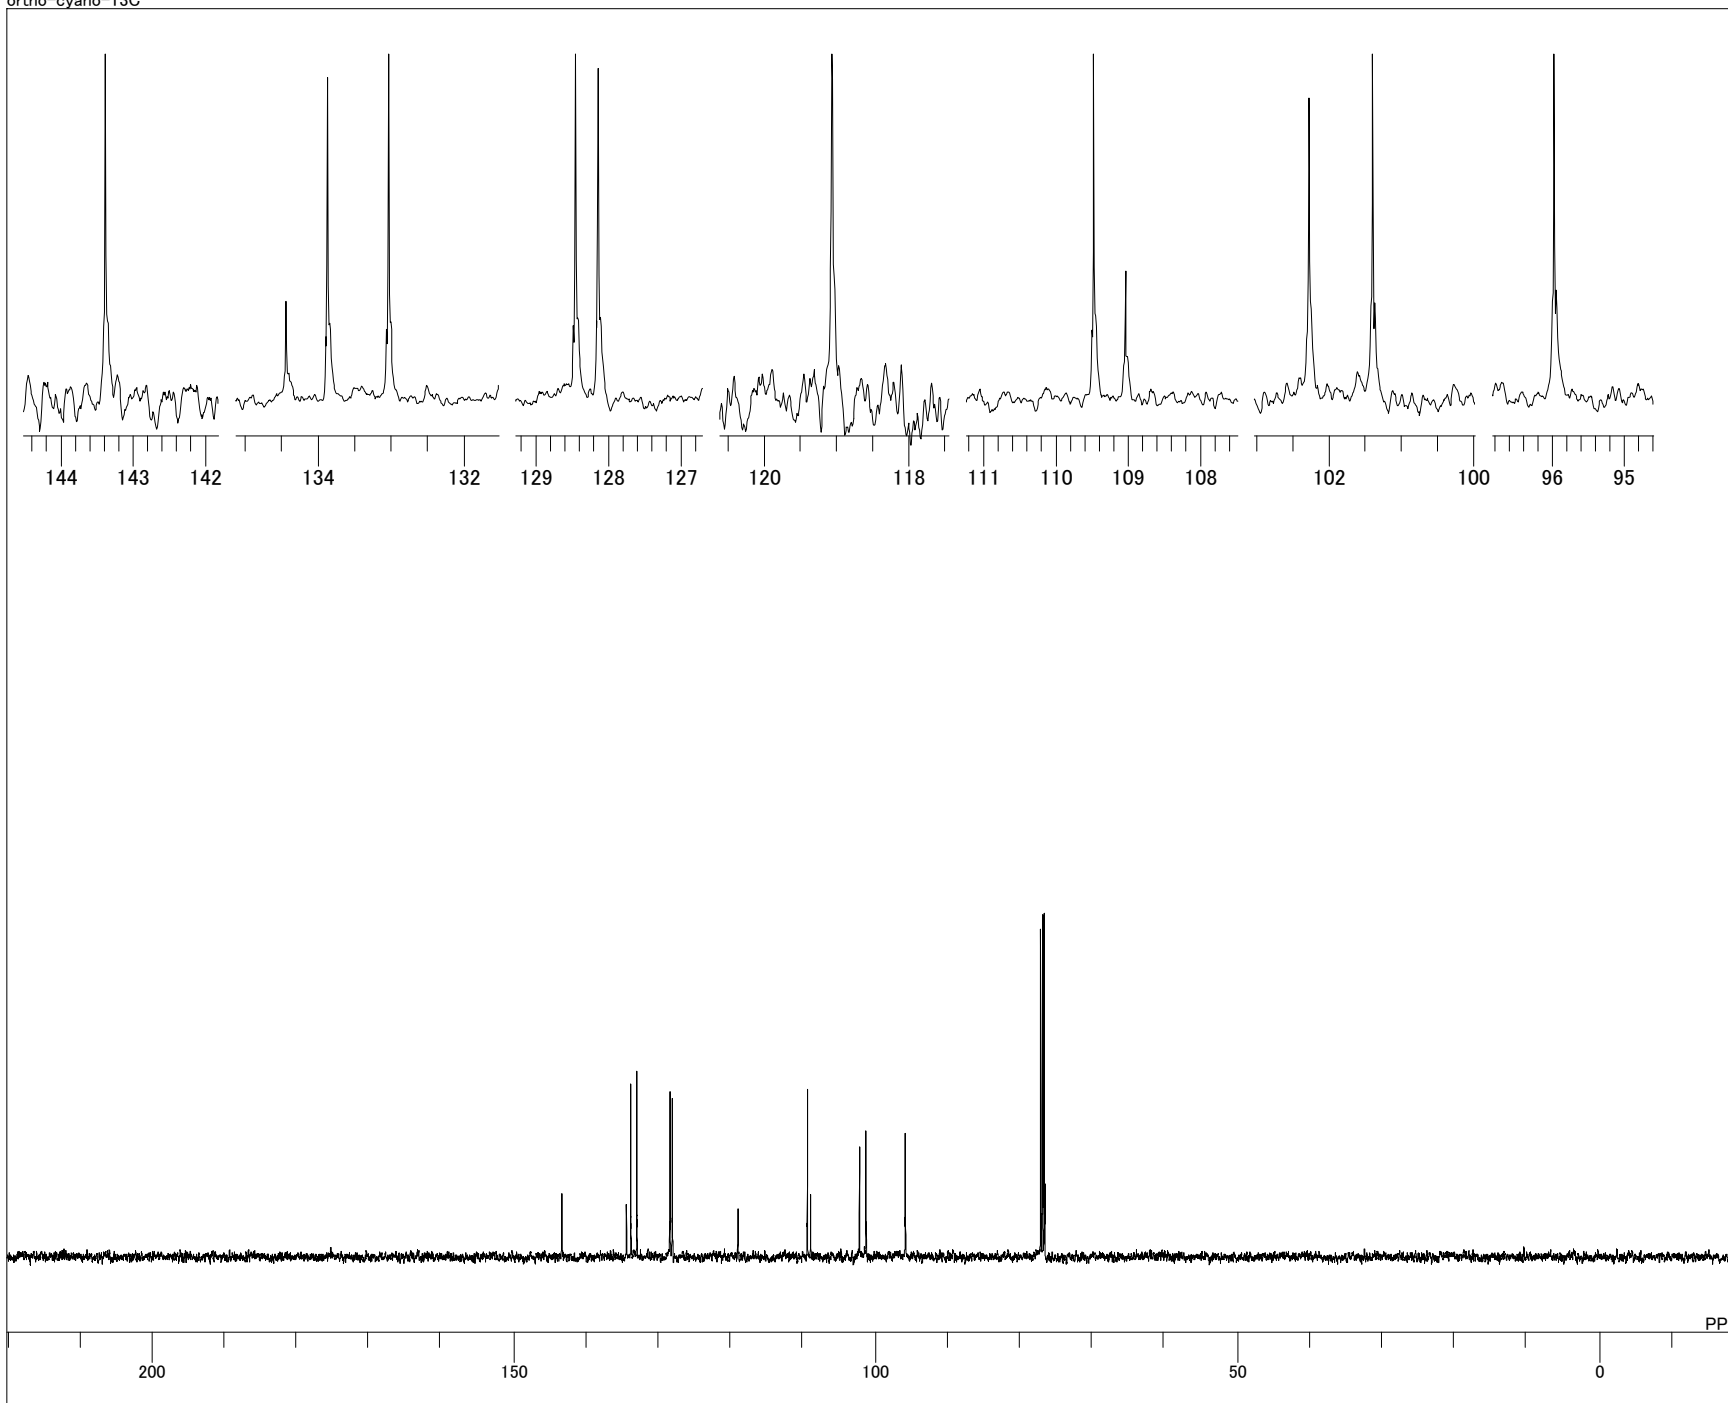

DFILE C:\Documents and Settings\All Users\Documents  
COMNT ortho-cyano-13C  
DATIM 07-12-2012 22:53:06  
OBNUC 13C  
EXMOD single\_pulse\_dec  
OBFRQ 125.77 MHz  
OBSET 7.87 KHz  
OBFIN 4.21 Hz  
POINT 32768  
FREQU 39308.18 Hz  
SCANS 20  
ACQTM 0.8336 sec  
PD 2.0000 sec  
PW1 3.83 usec  
IRNUC 1H  
CTEMP 20.8 c  
SLVNT CDCL3  
EXREF 77.00 ppm  
BF 1.20 Hz  
RGAIN 60

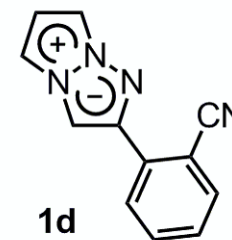







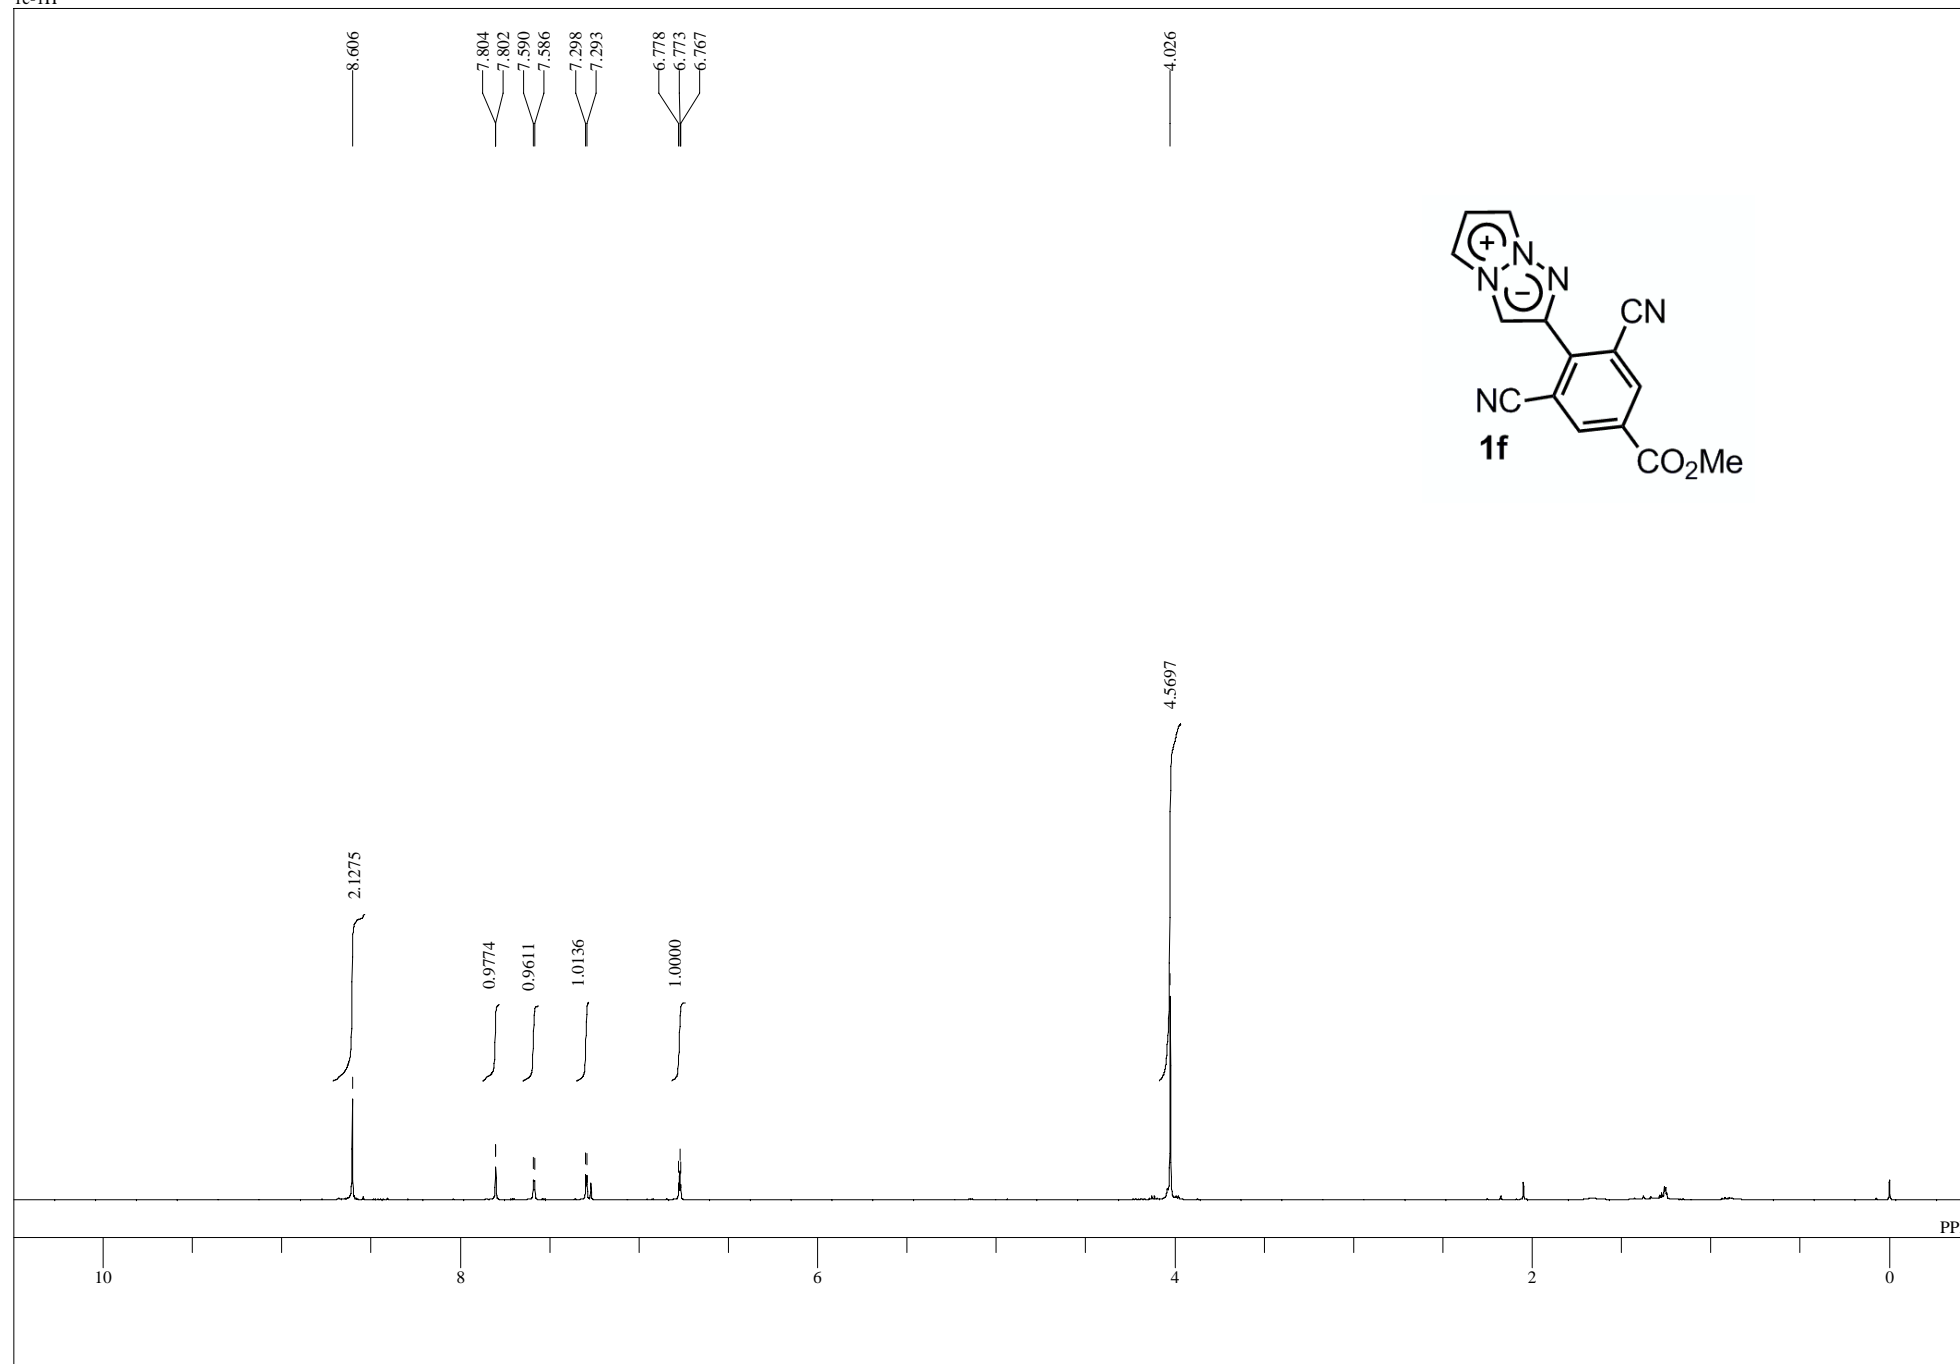

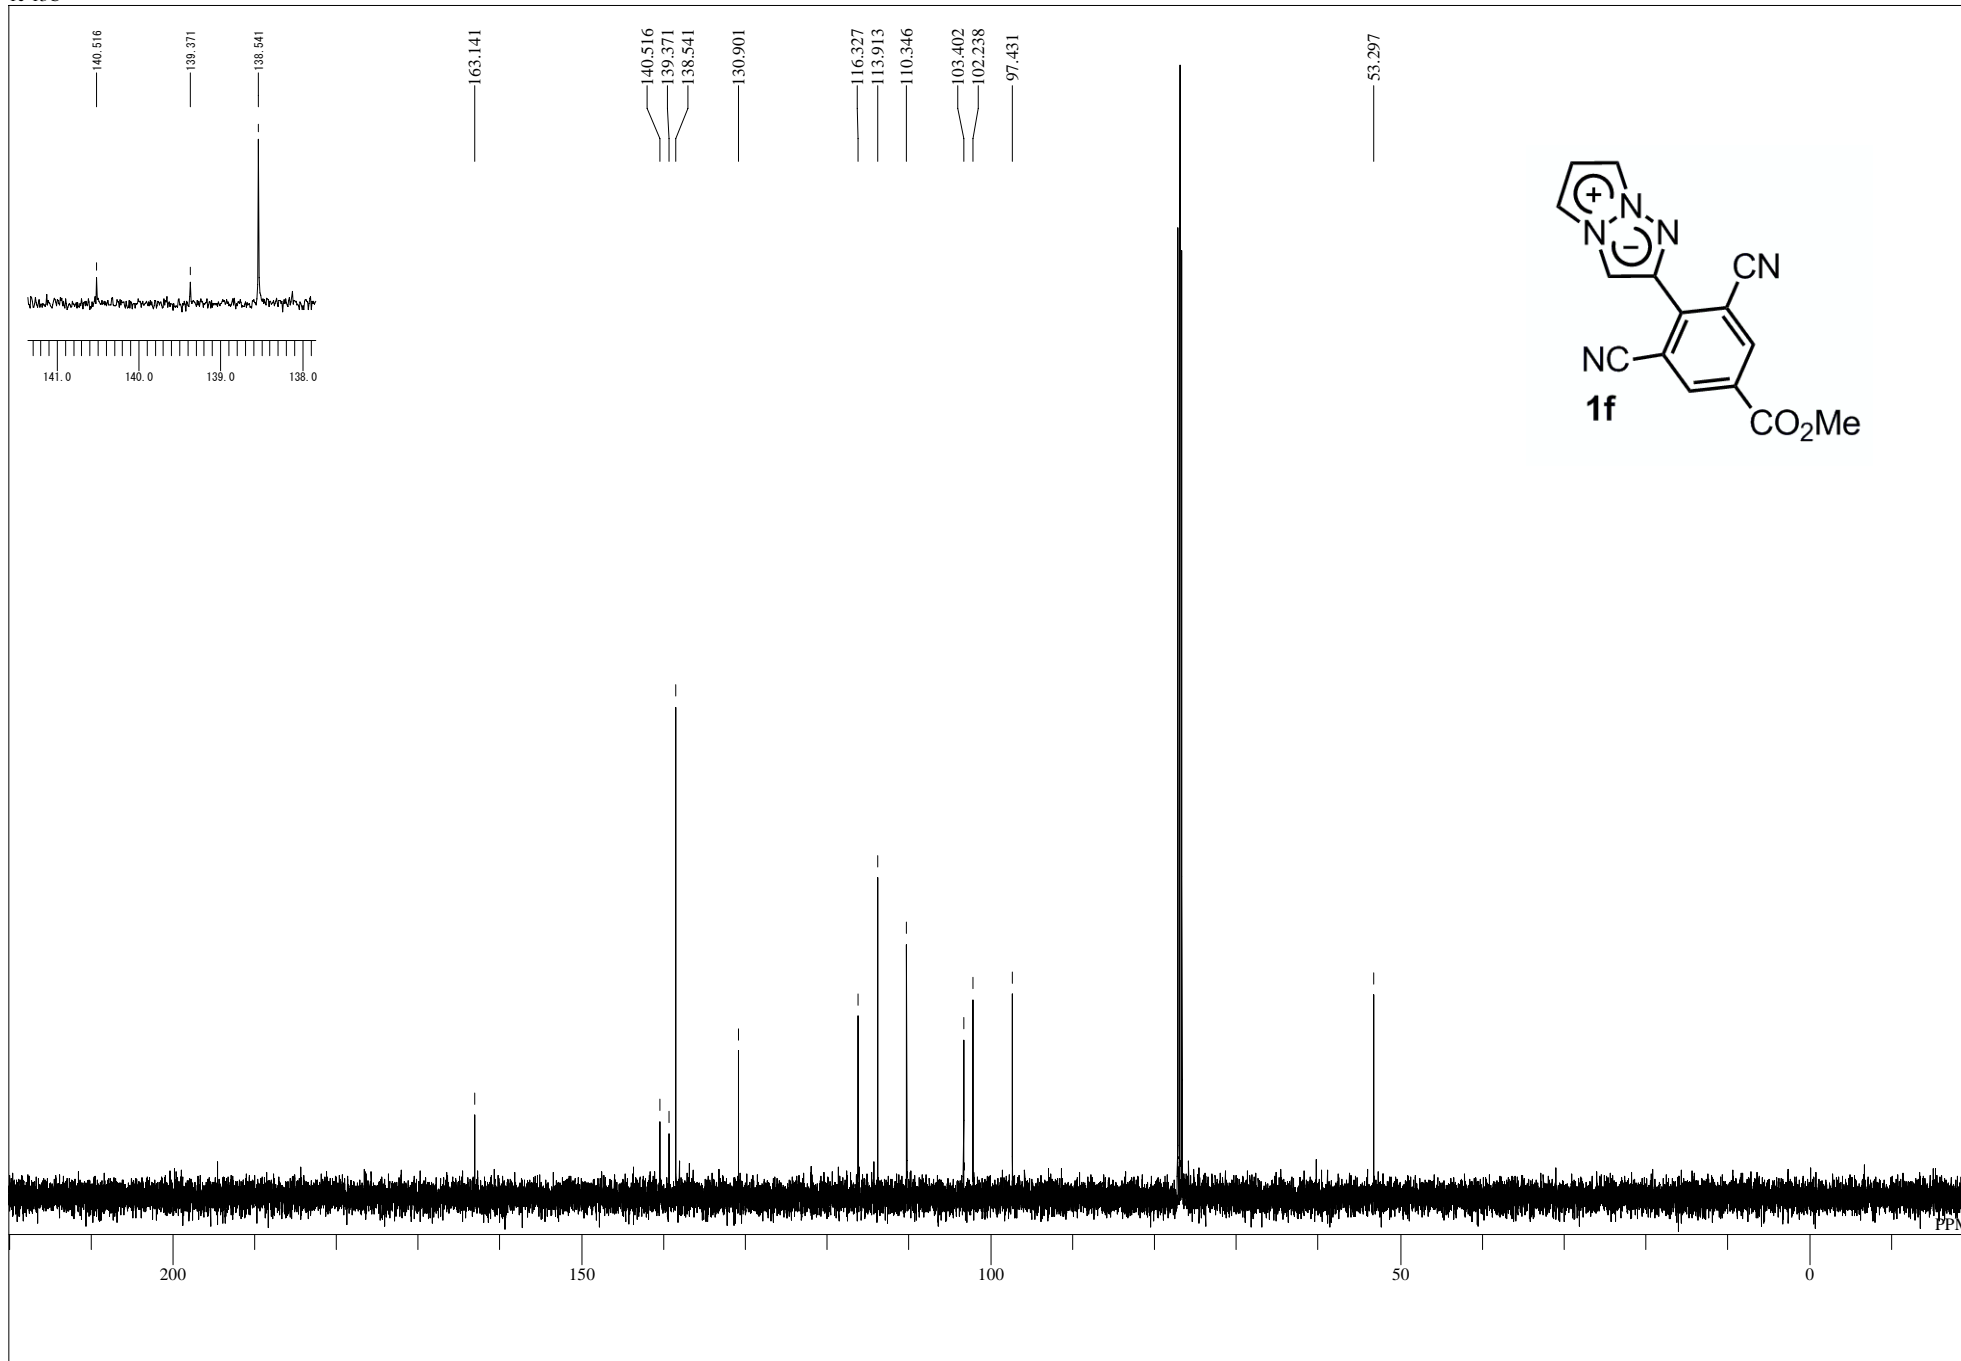

C6H4CO2Me-1H

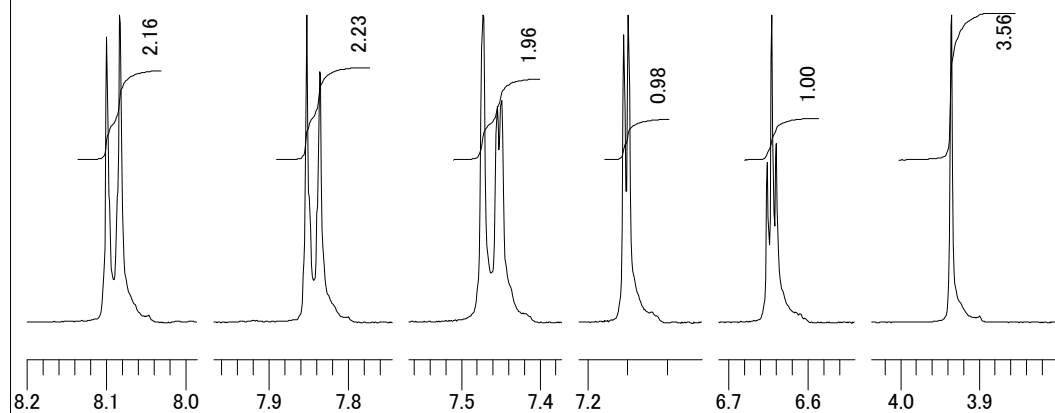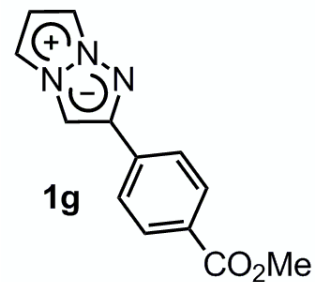

D:\Documents and Settings  
COMNT C6H4CO2Me-1H  
DATIM 10-12-2012 17:11:50  
OBNUC 1H  
EXMOD single\_pulse.ex2  
OBFREQ 500.16 MHz  
OBSET 2.41 KHz  
OBFIN 6.01 Hz  
POINT 16384  
FREQU 9384.38 Hz  
SCANS 5  
ACQTM 1.7459 sec  
PD 1.0000 sec  
PW1 6.50 usec  
IRNUC 1H  
CTEMP 19.7 c  
SLVNT CDCL3  
EXREF 0.00 ppm  
BF 0.12 Hz  
RGAIN 50

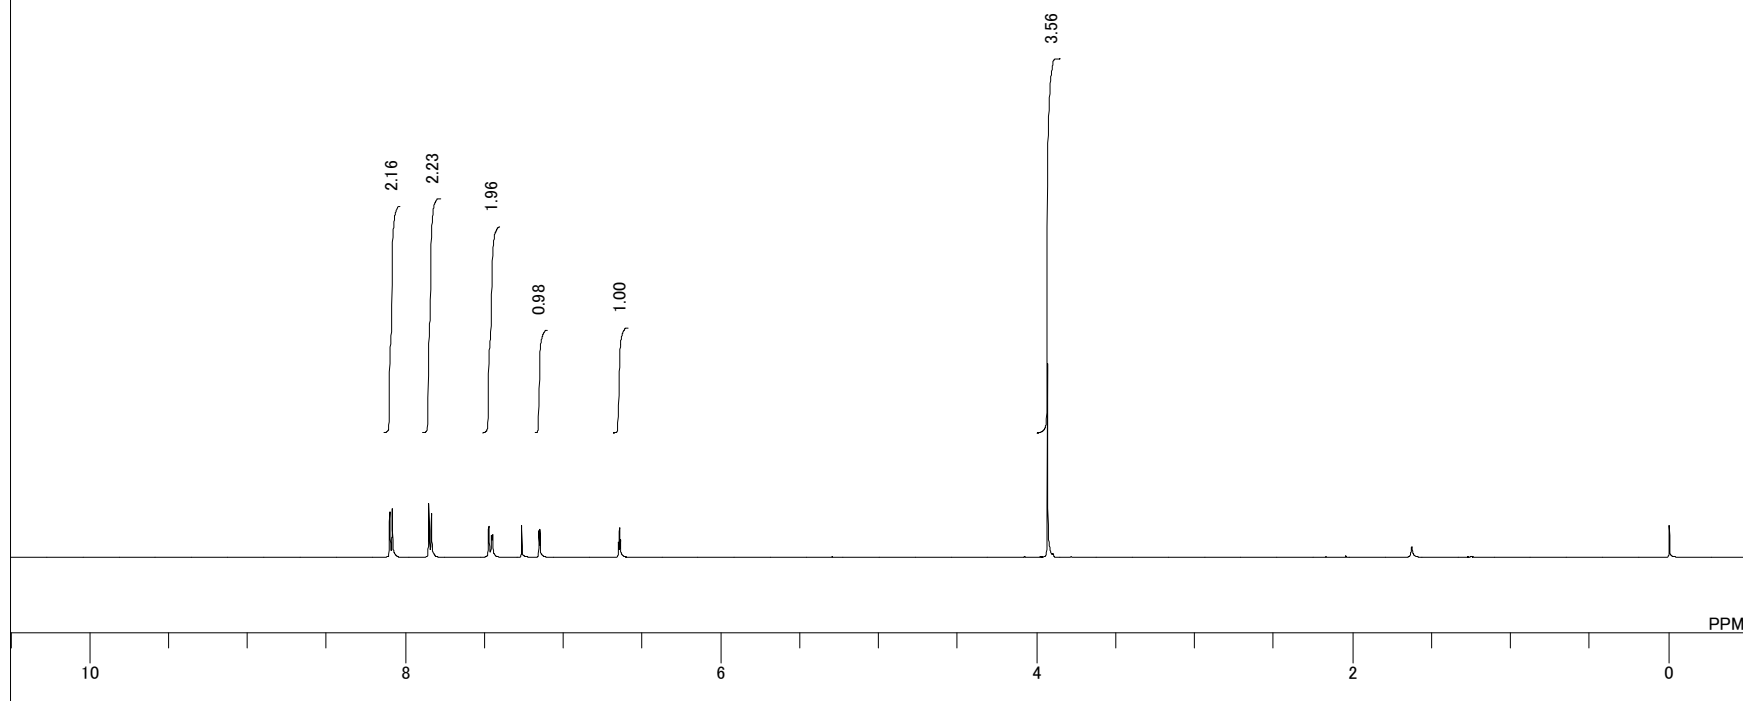

C6H4CO2Me-13C

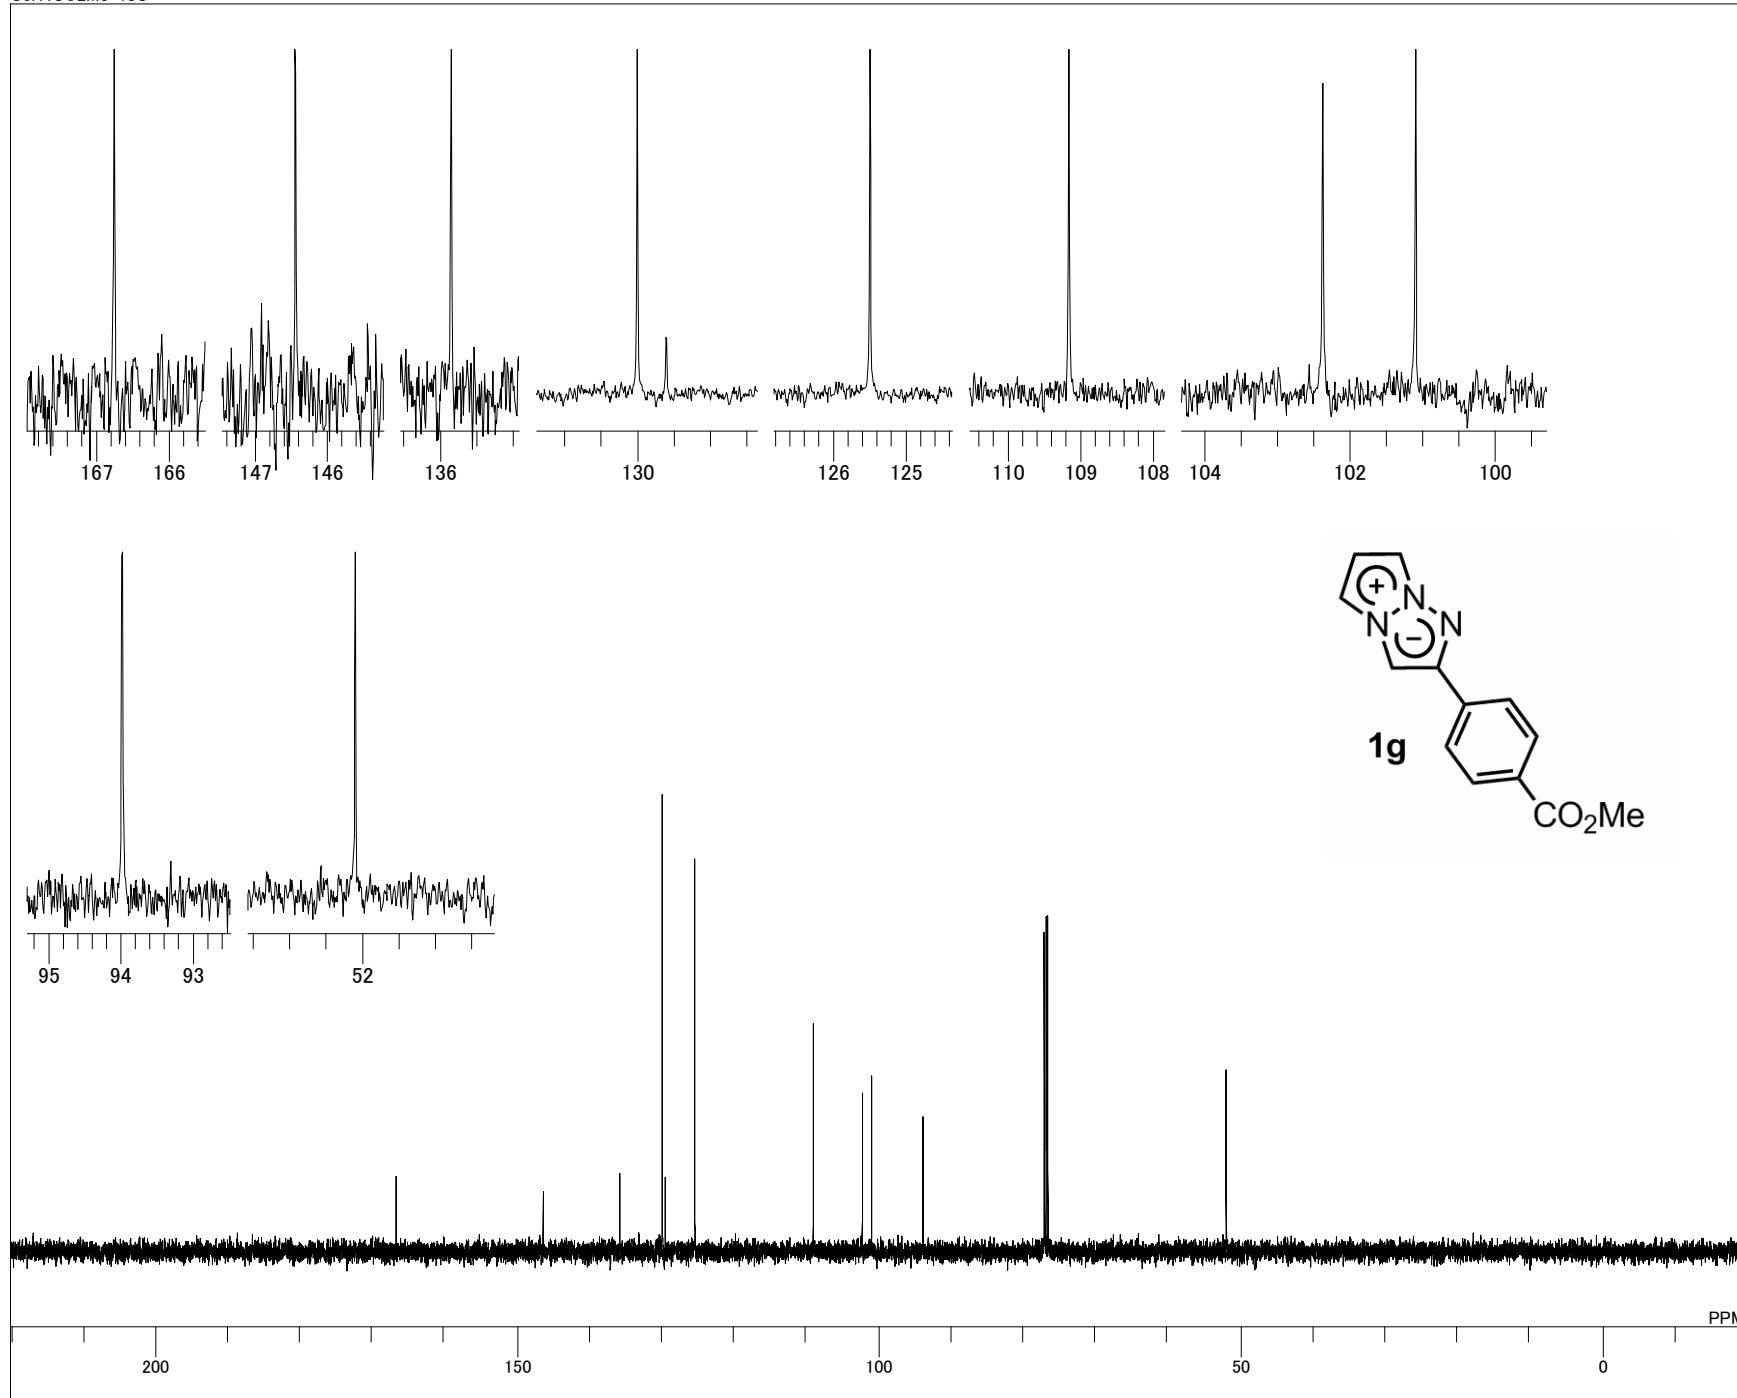

DFILE C:\Documents and Settings  
COMNT C6H4CO2Me-13C  
DATIM 10-12-2012 19:45:54  
OBNUC 13C  
EXMOD single\_pulse\_dec  
OBFREQ 125.77 MHz  
OBSET 7.87 KHz  
OBFIN 4.21 Hz  
POINT 32768  
FREQU 39308.18 Hz  
SCANS 35  
ACQTM 0.8336 sec  
PD 2.0000 sec  
PW1 3.83 usec  
IRNUC 1H  
CTEMP 20.0 c  
SLVNT CDCL3  
EXREF 77.00 ppm  
BF 1.20 Hz  
RGAIN 60

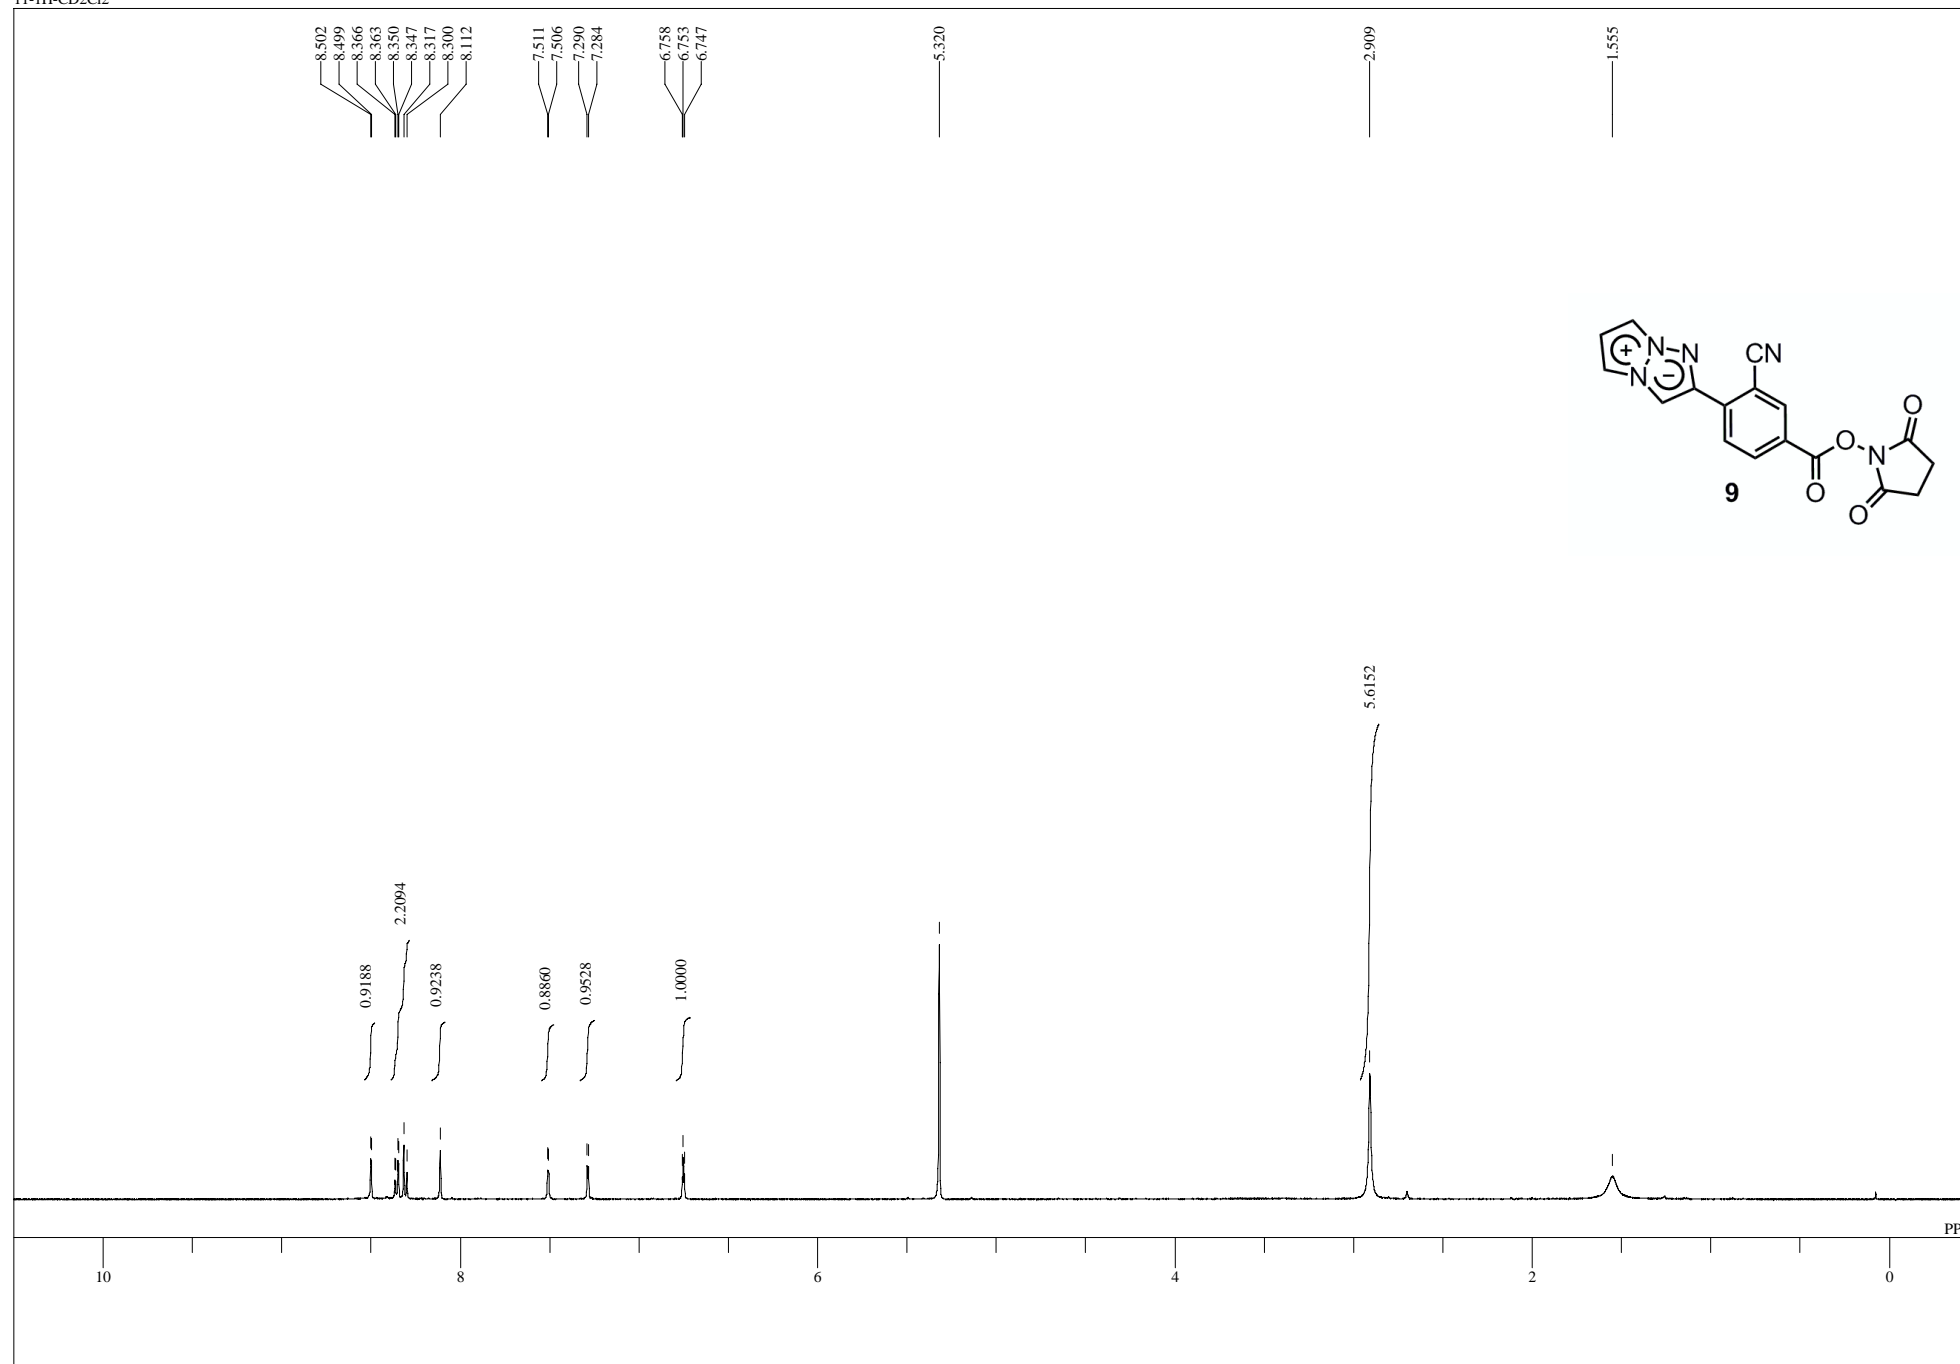

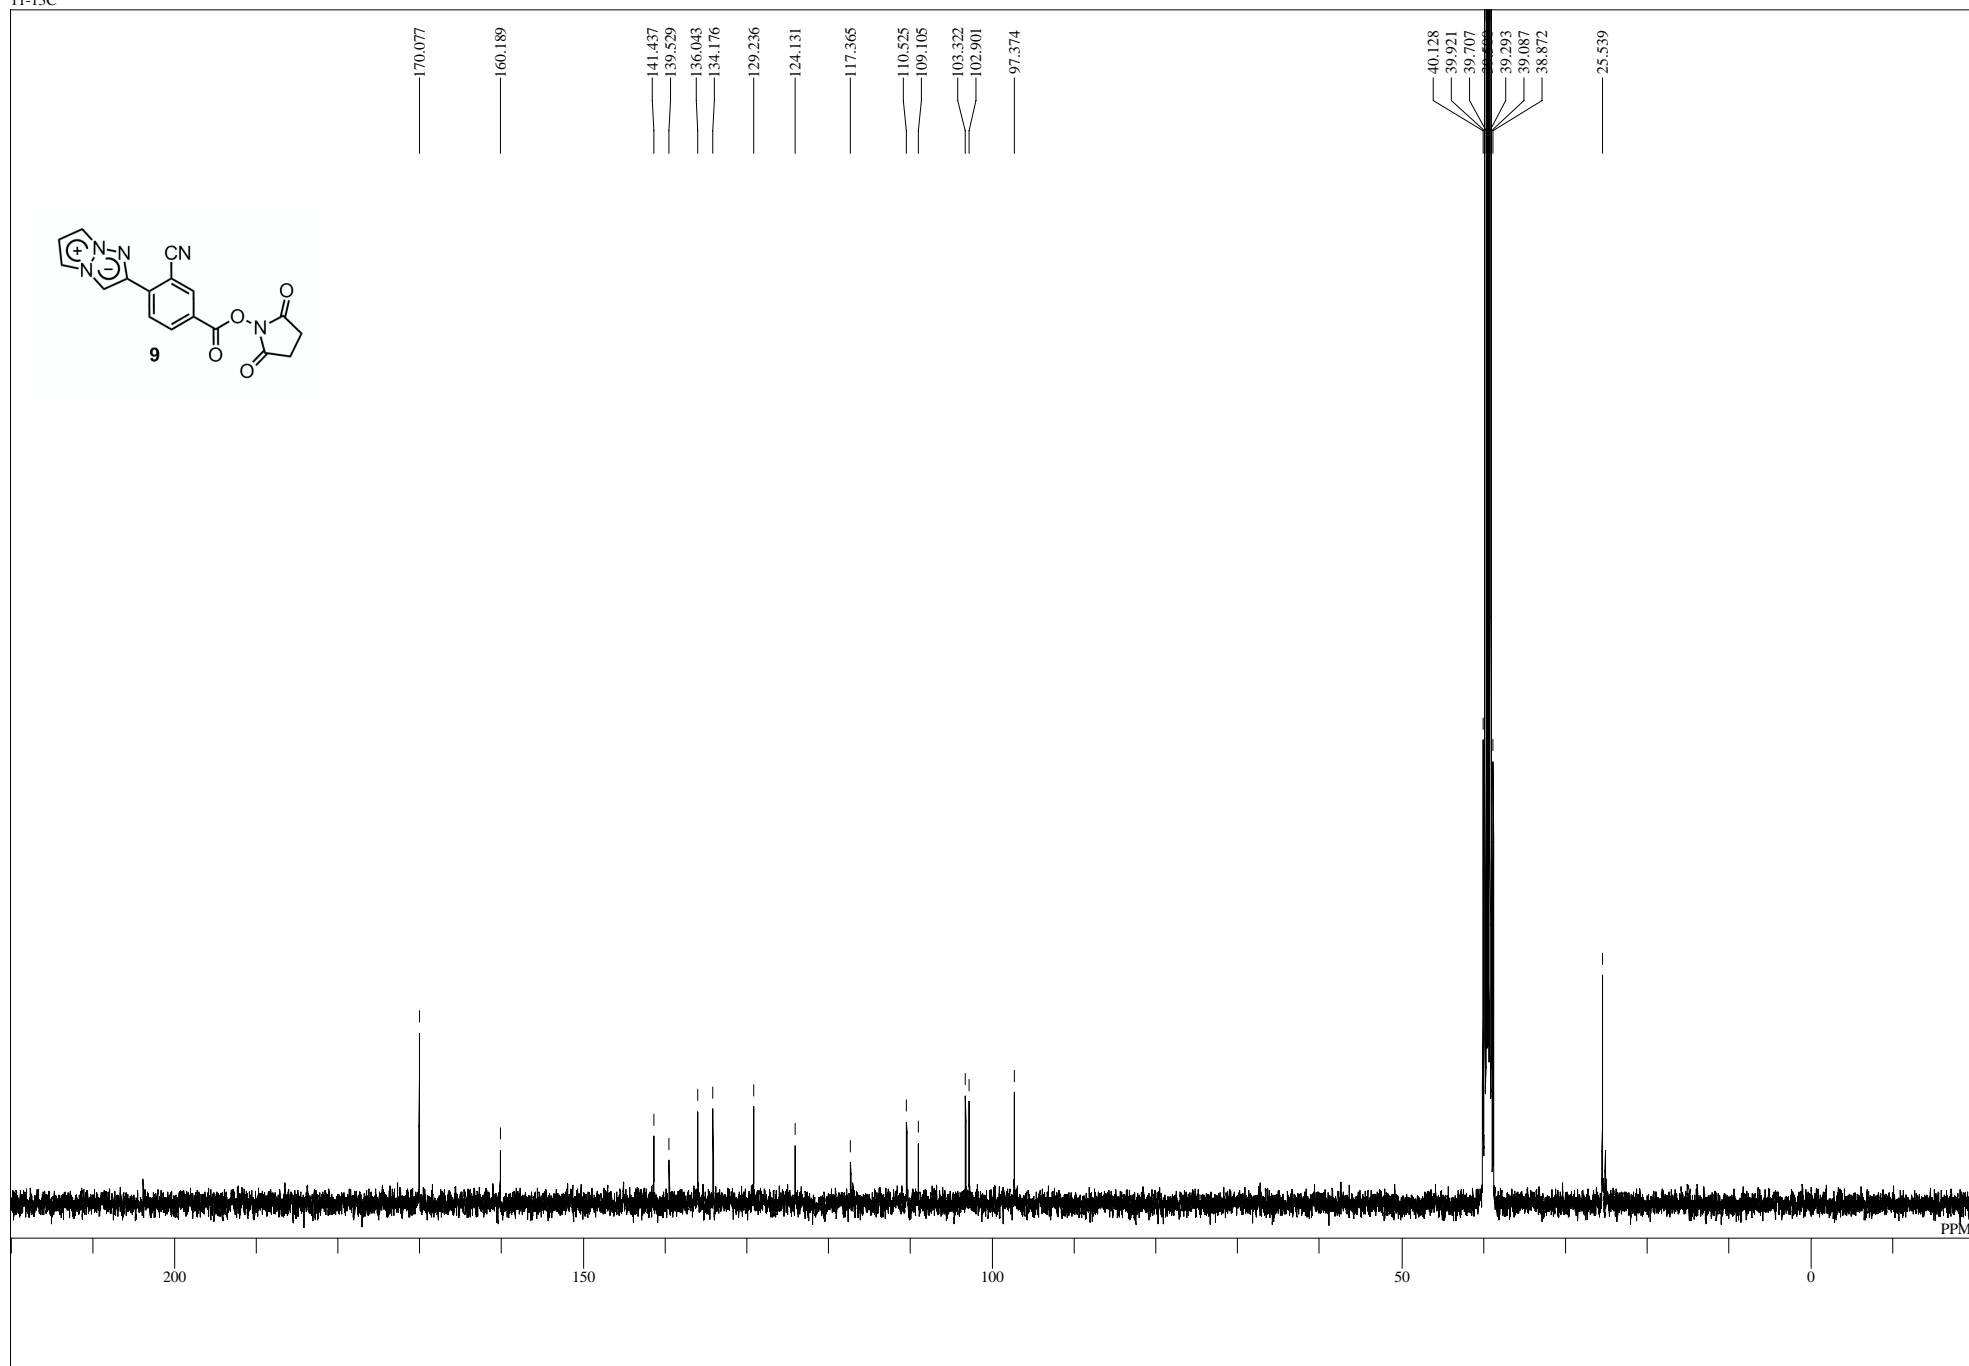



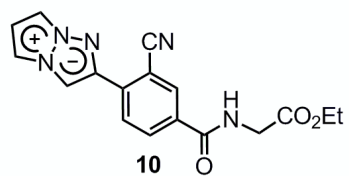

8.225  
8.209  
8.204  
8.064  
8.060  
8.043  
8.035

7.484  
7.226  
7.219

6.790  
6.708

4.317  
4.299  
4.281  
4.266  
4.253

1.352  
1.334  
1.317

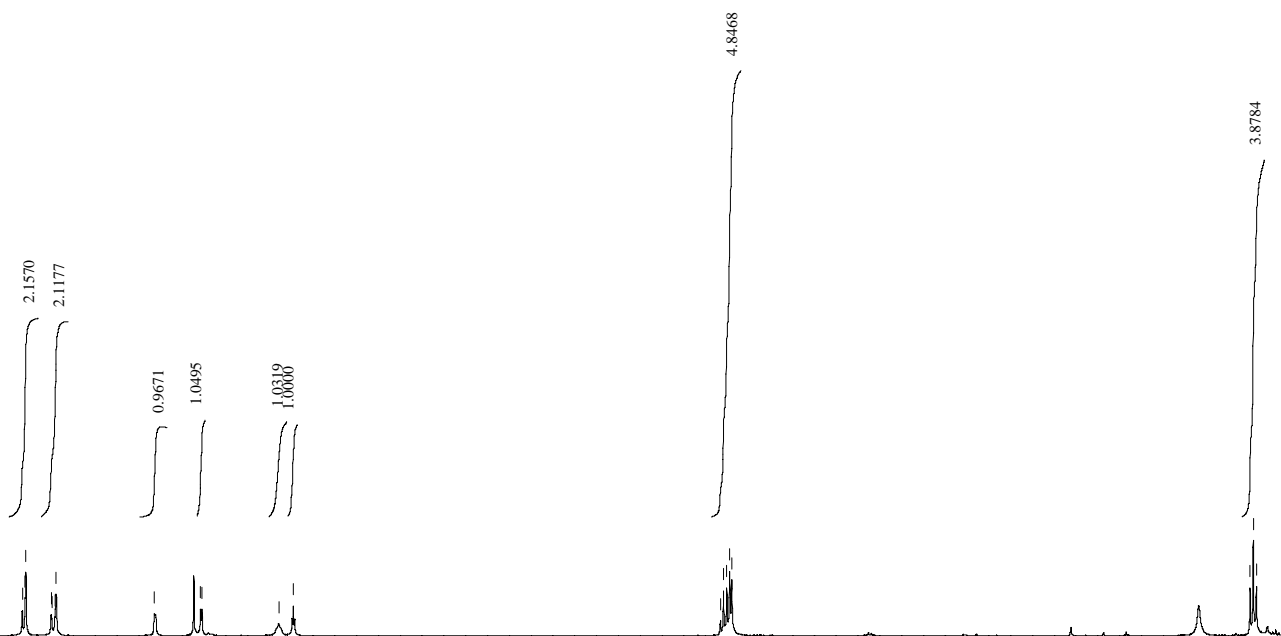

PPM

10

8

6

4

2

0

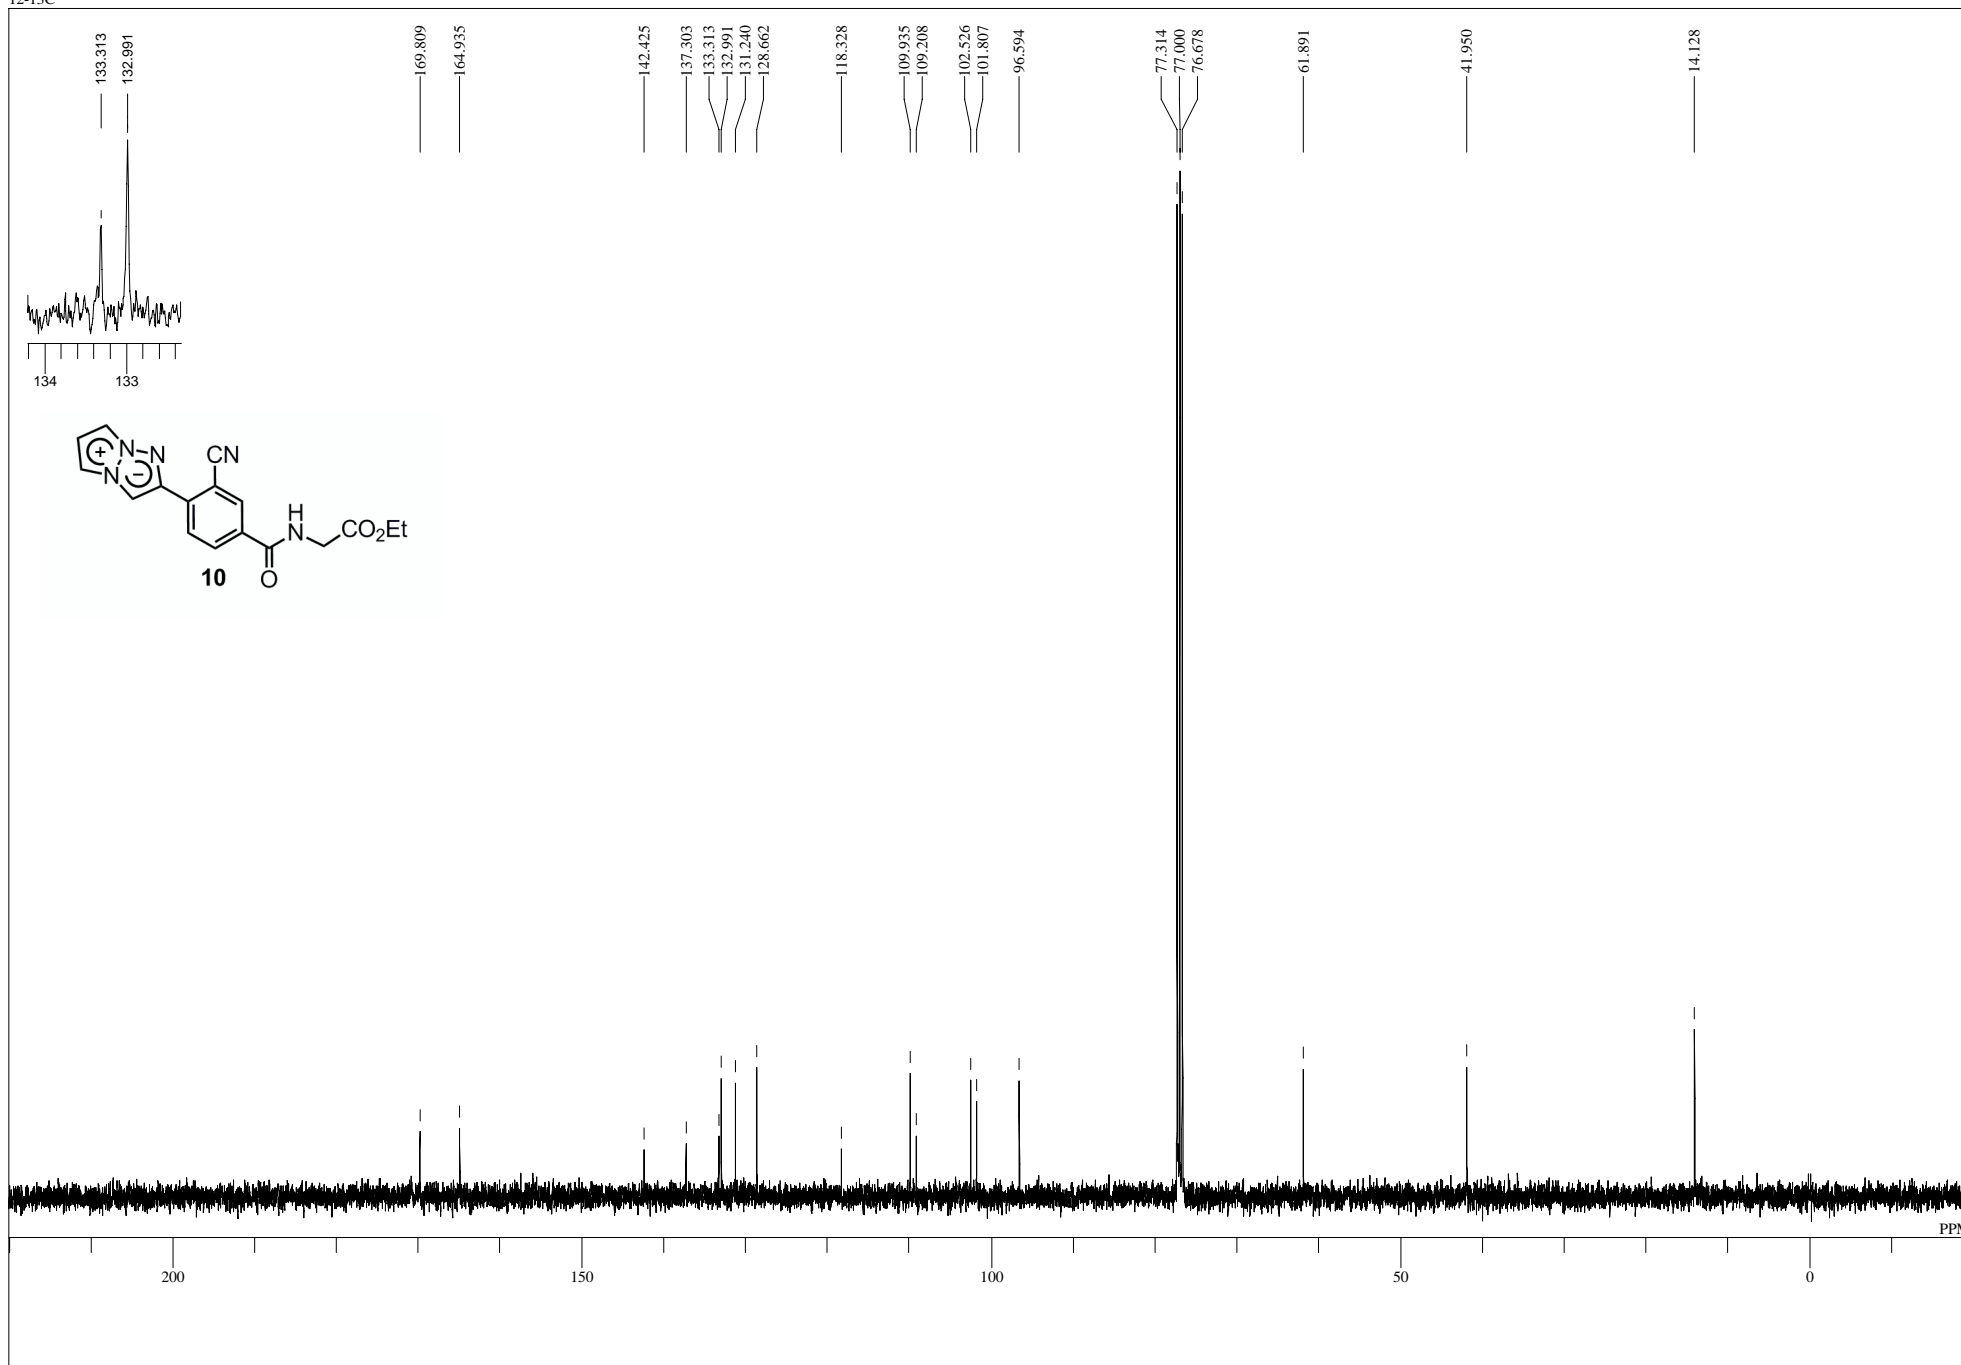

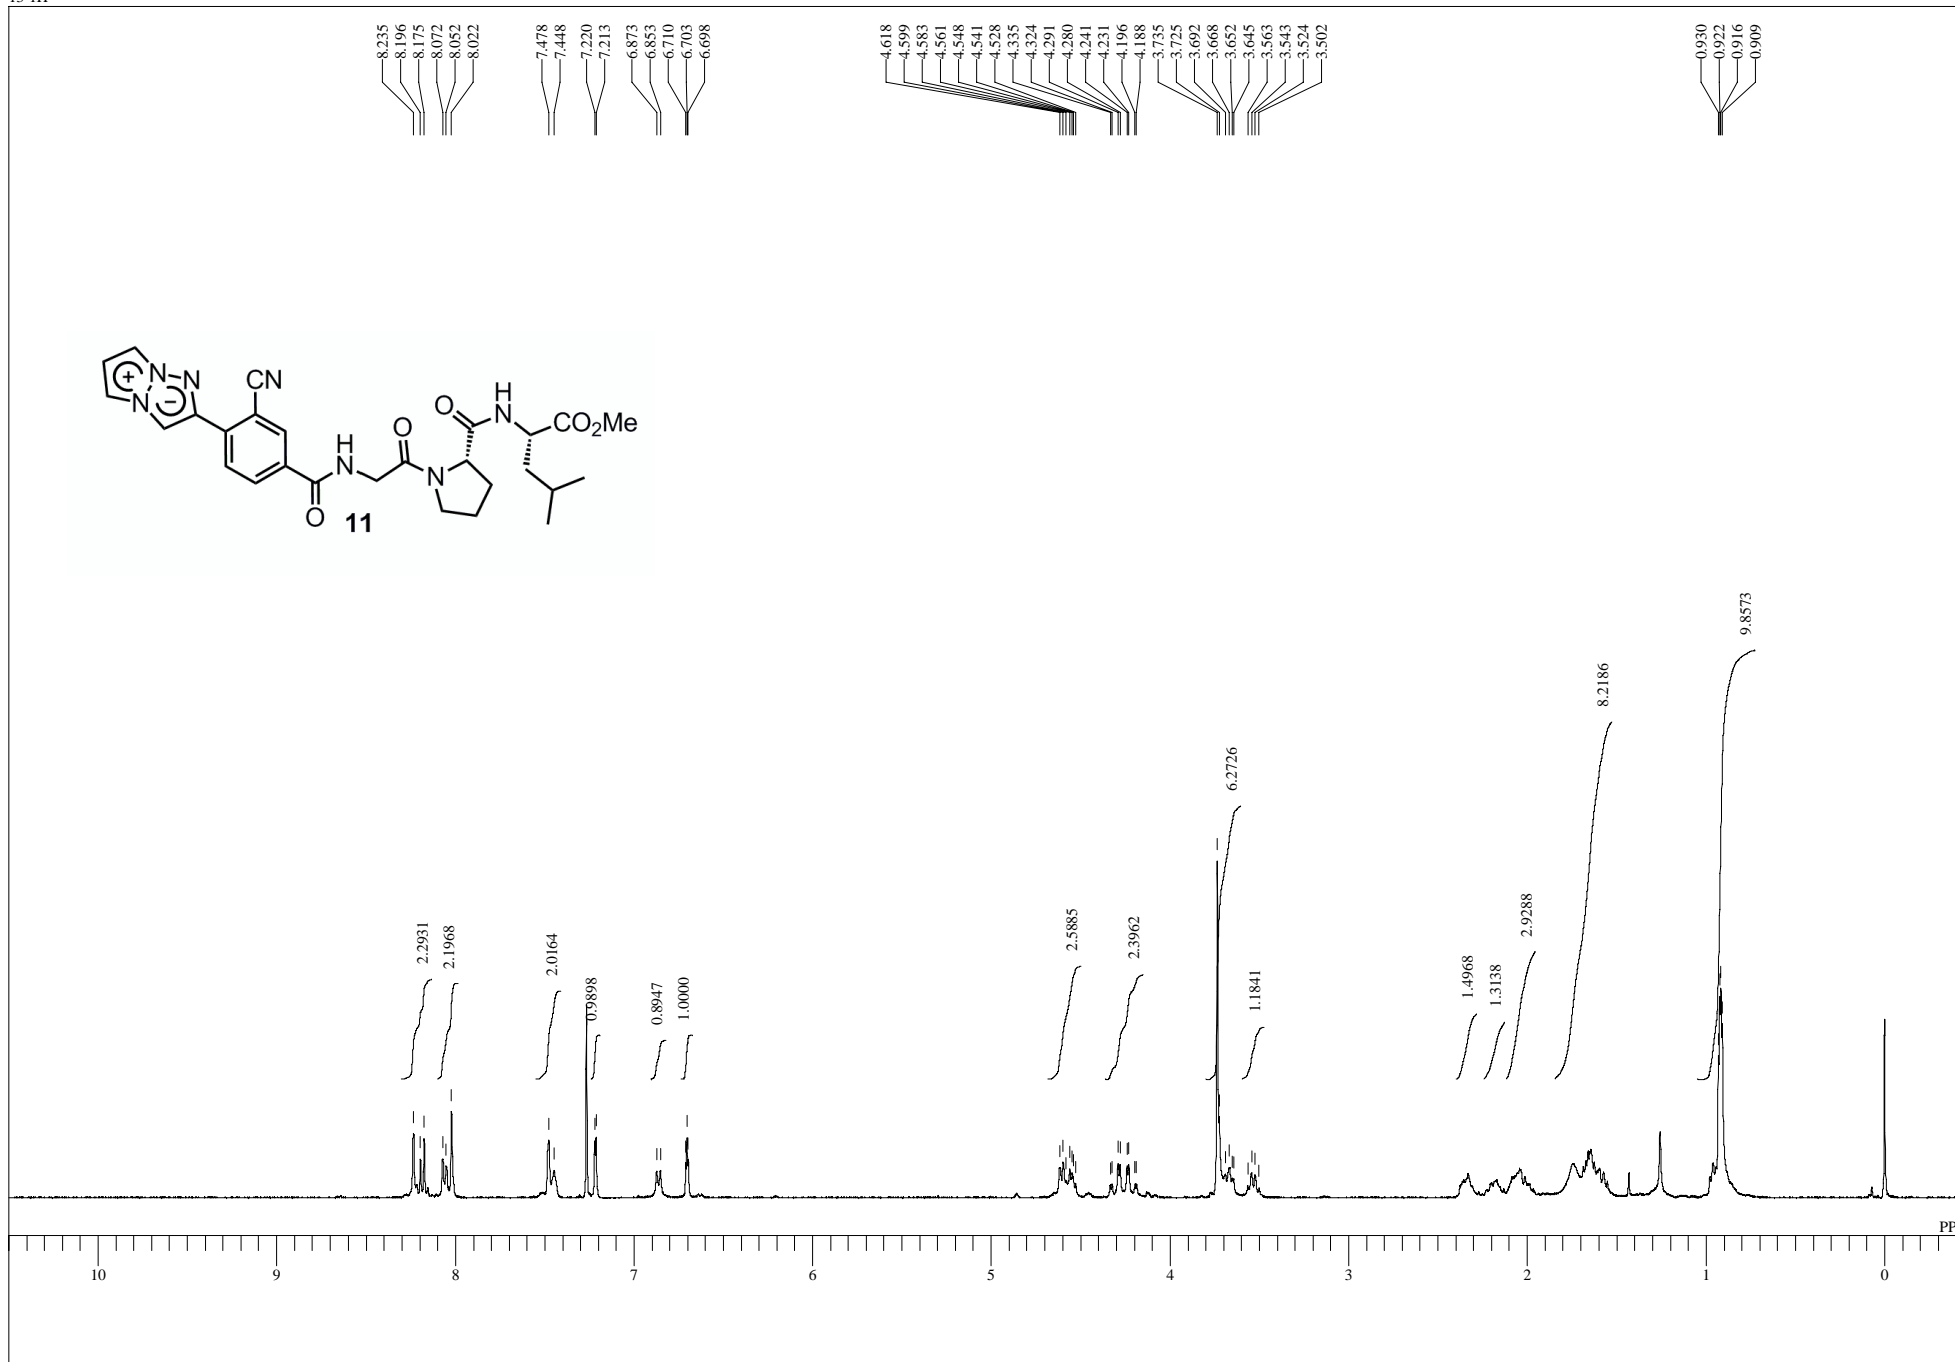

\\150.59.84.6\user\004BOT\osawa\TAP\tap-tripeptide-4-13C.ALS  
13-13C

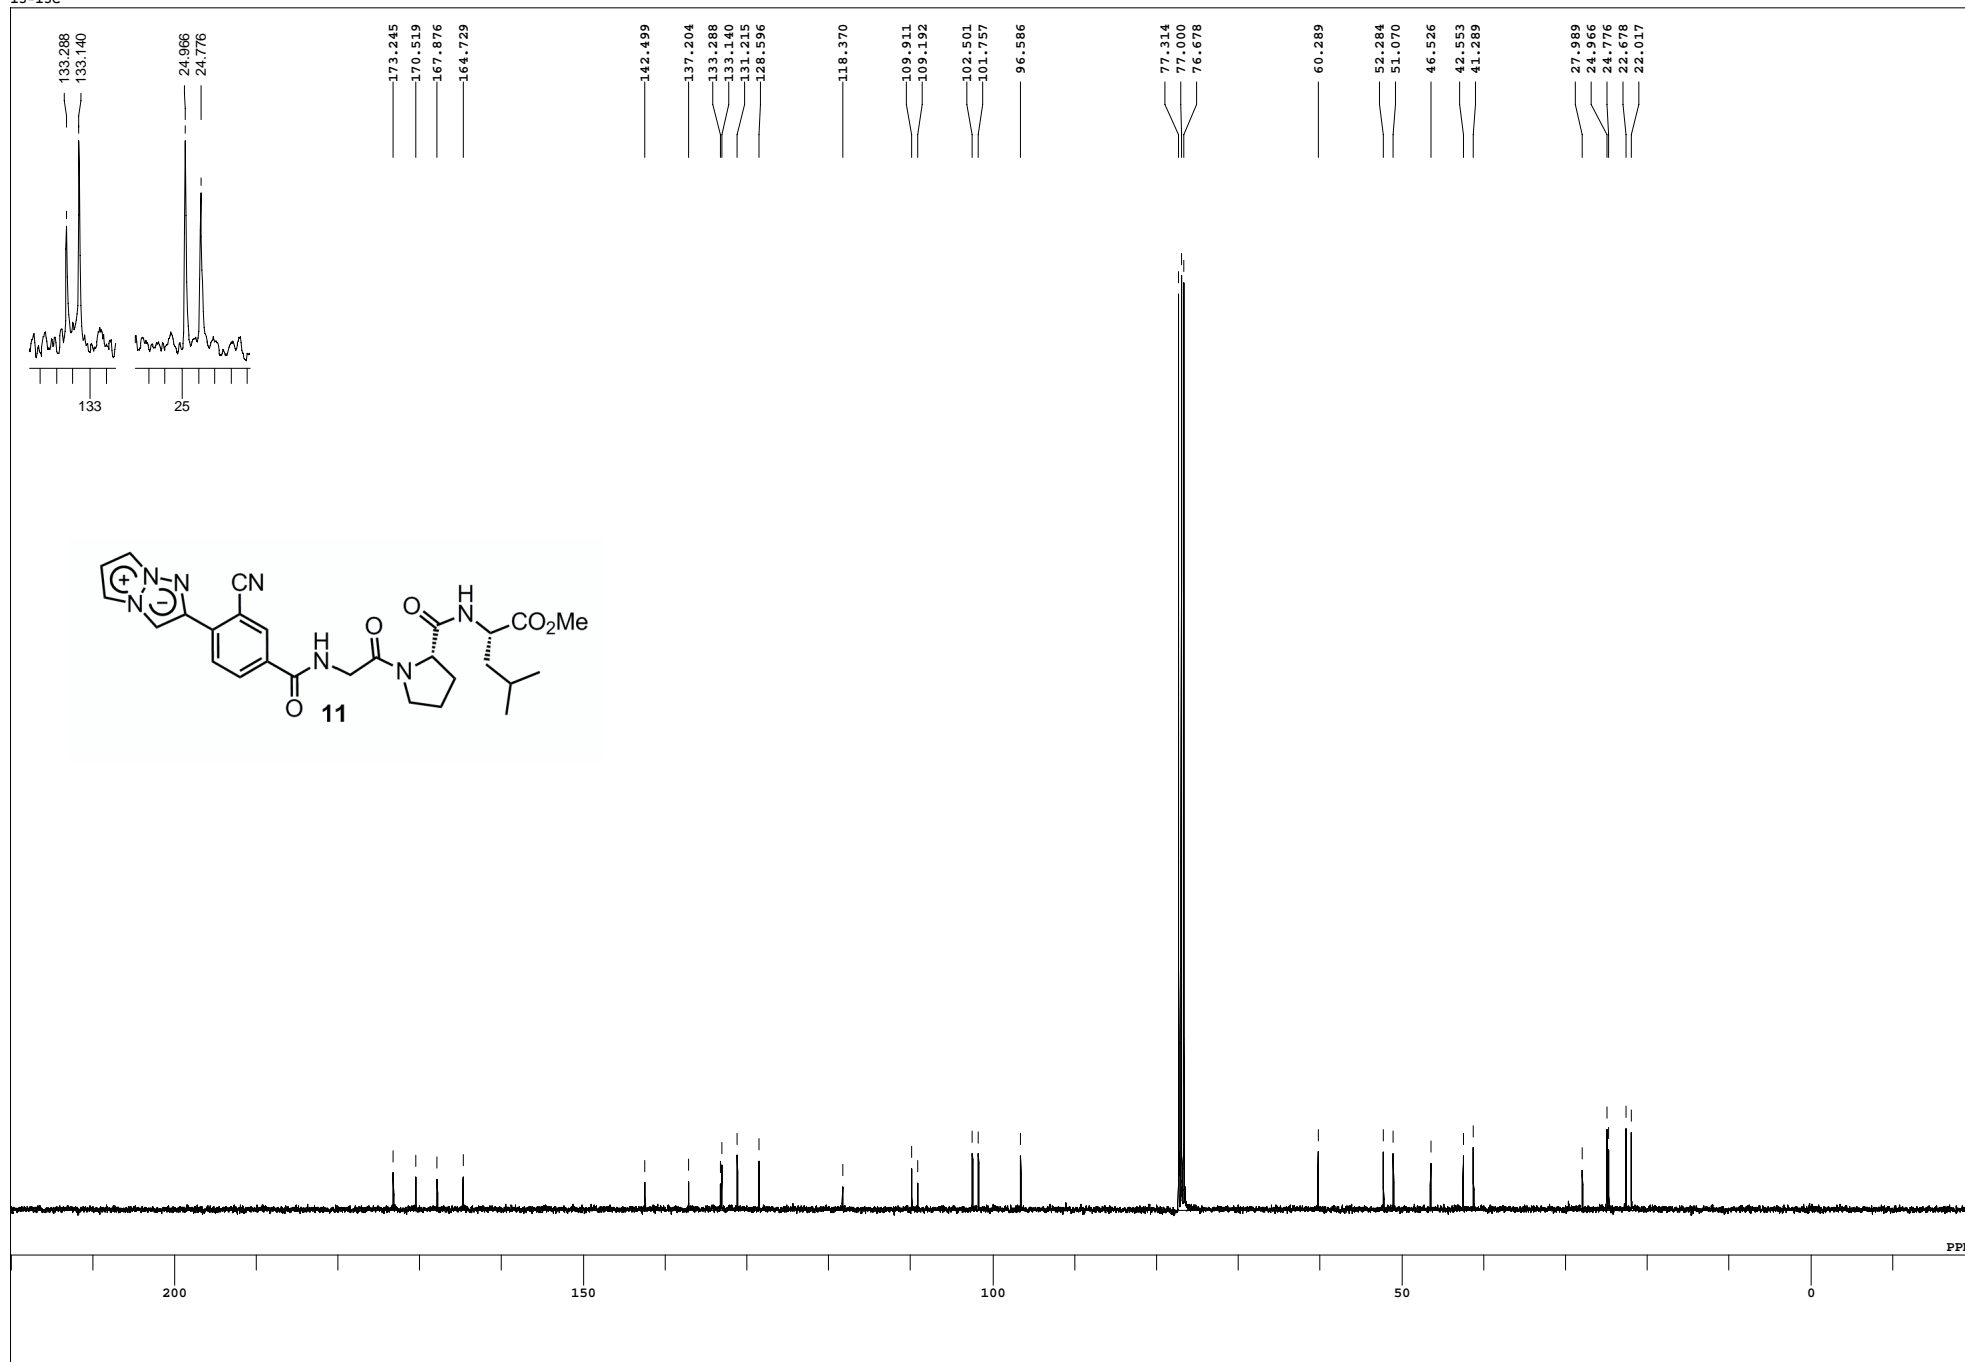

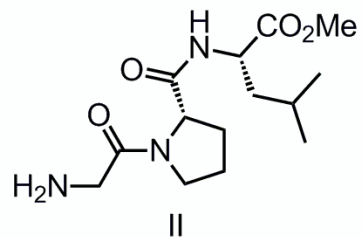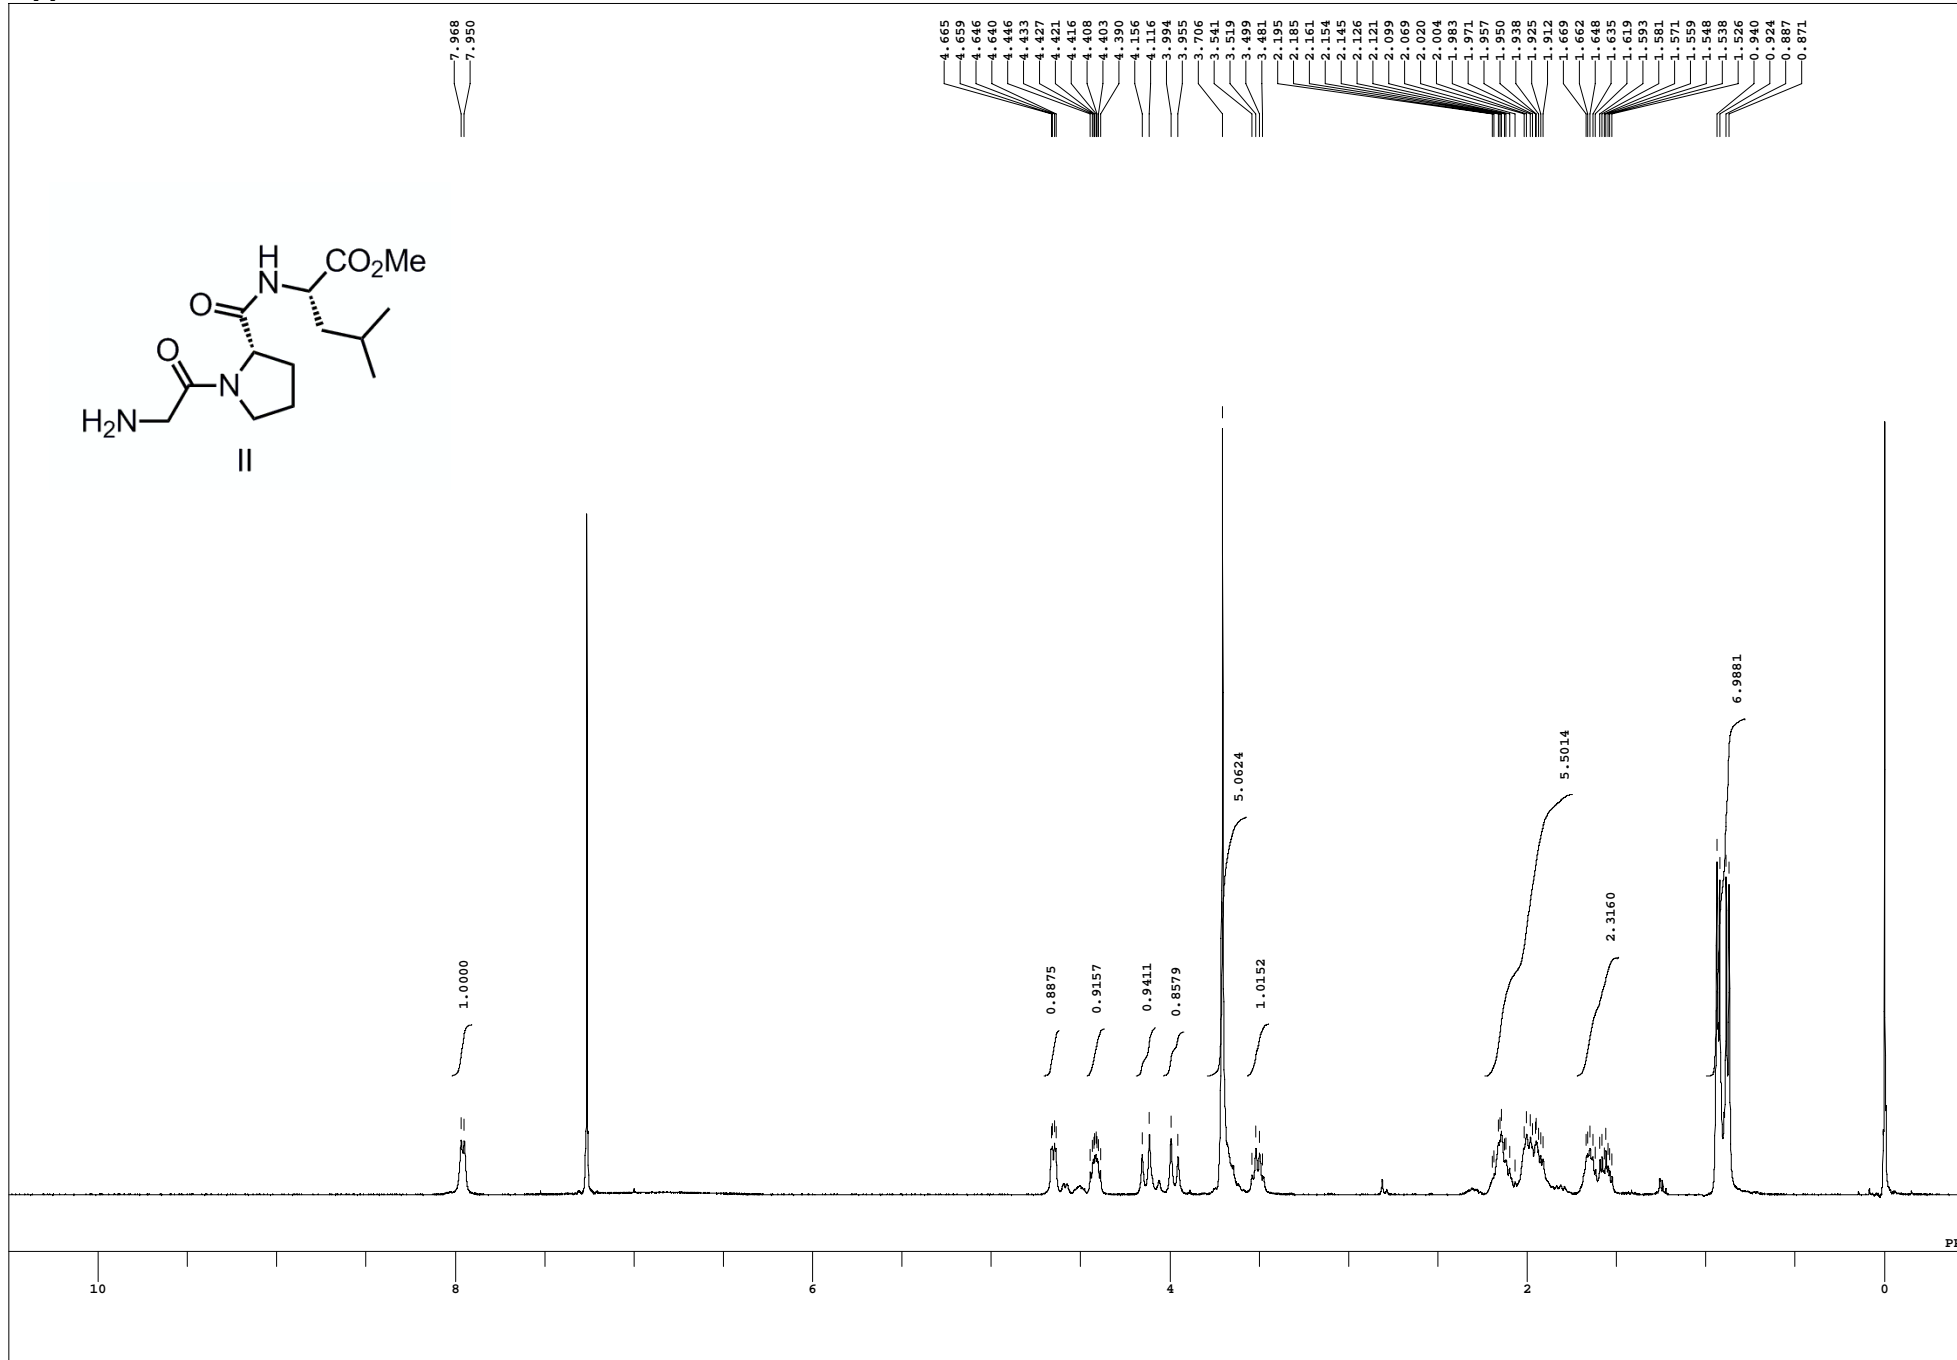

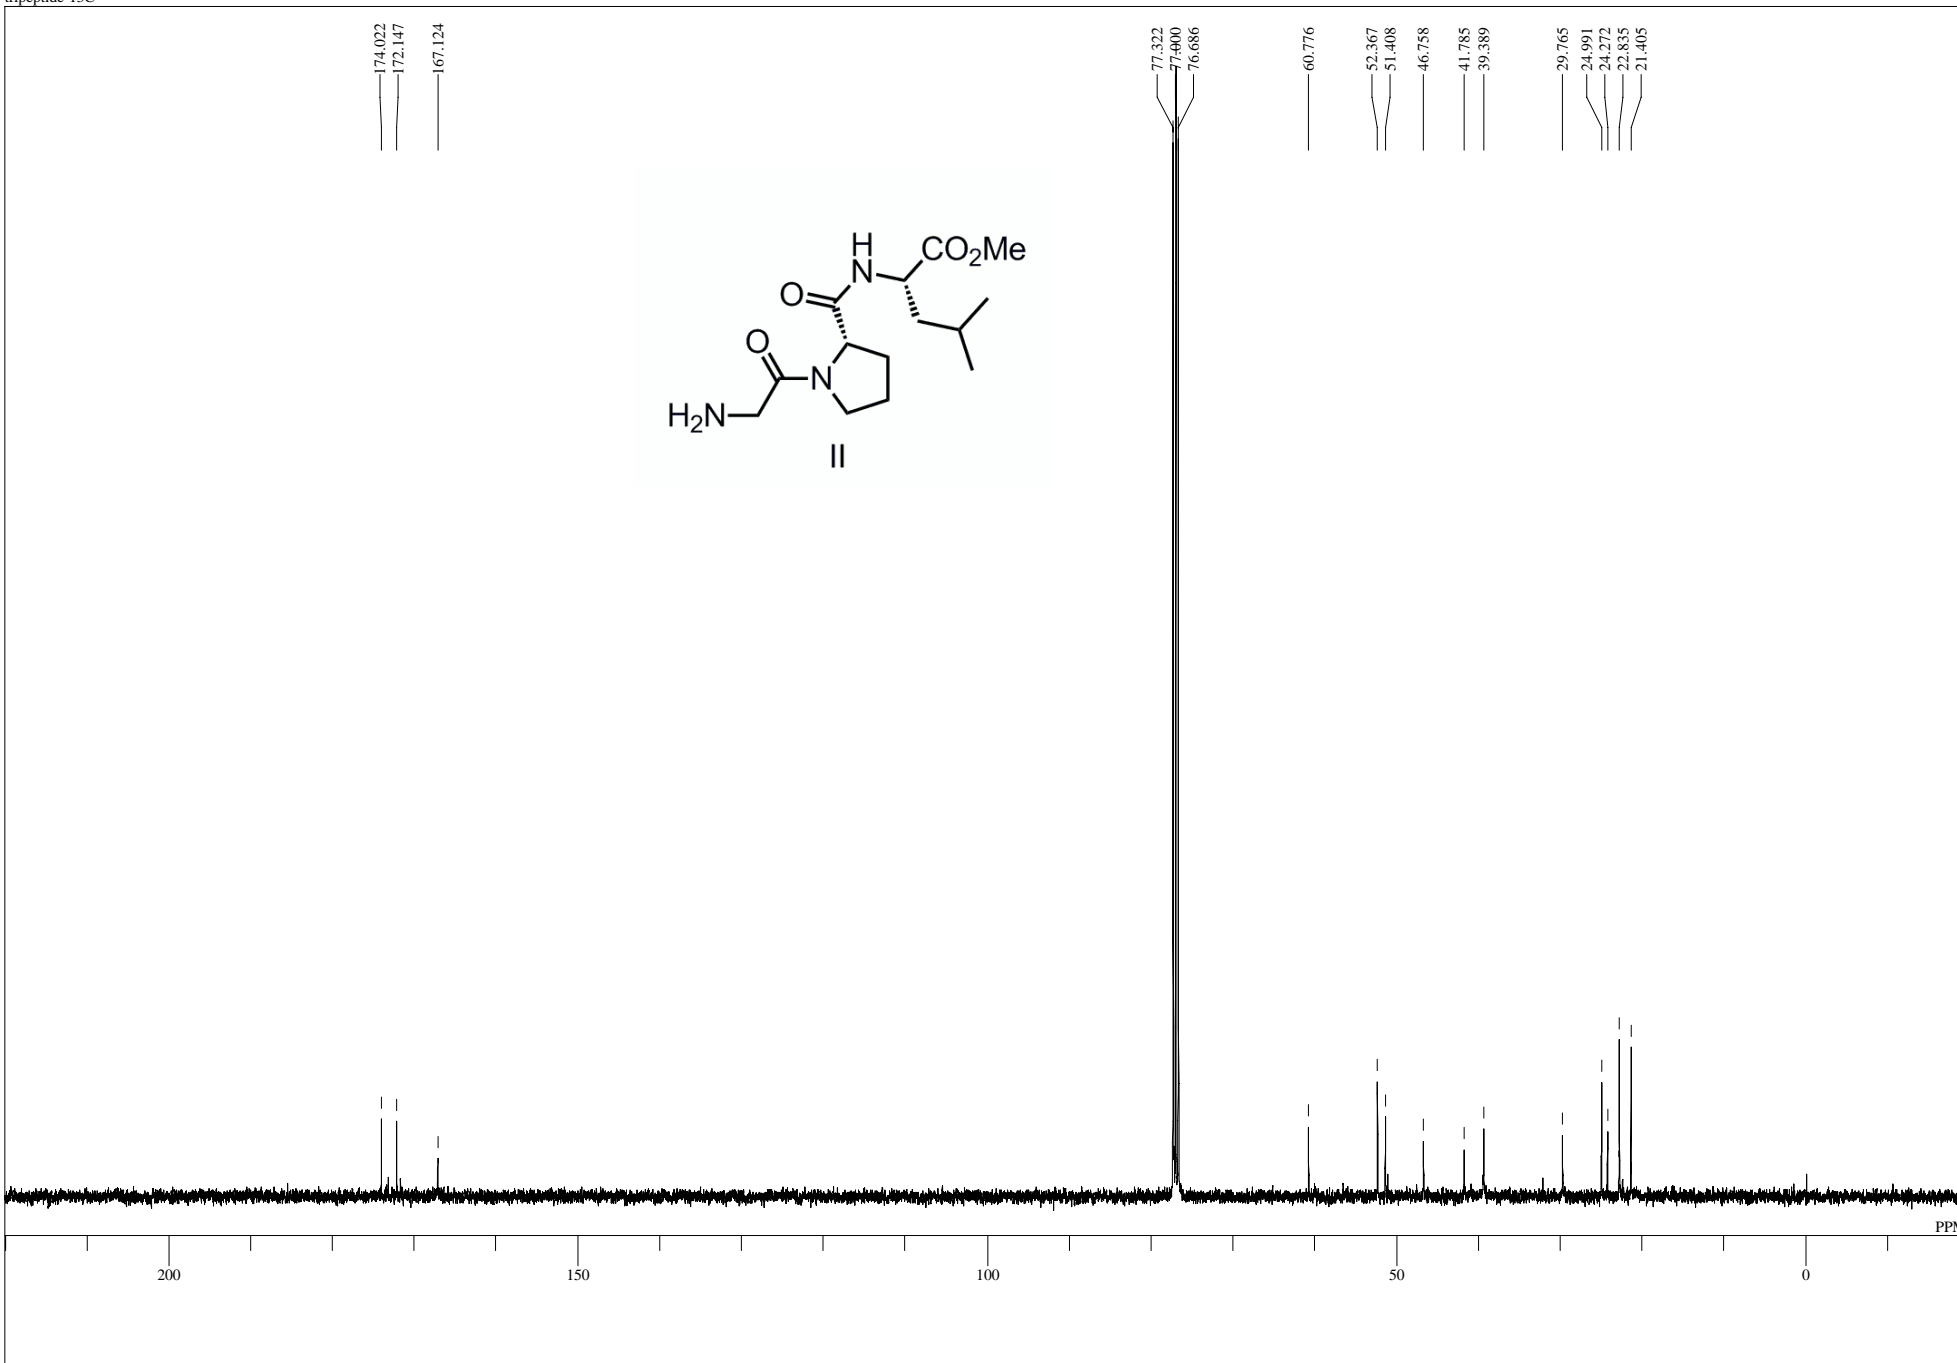

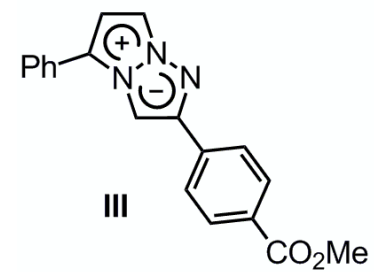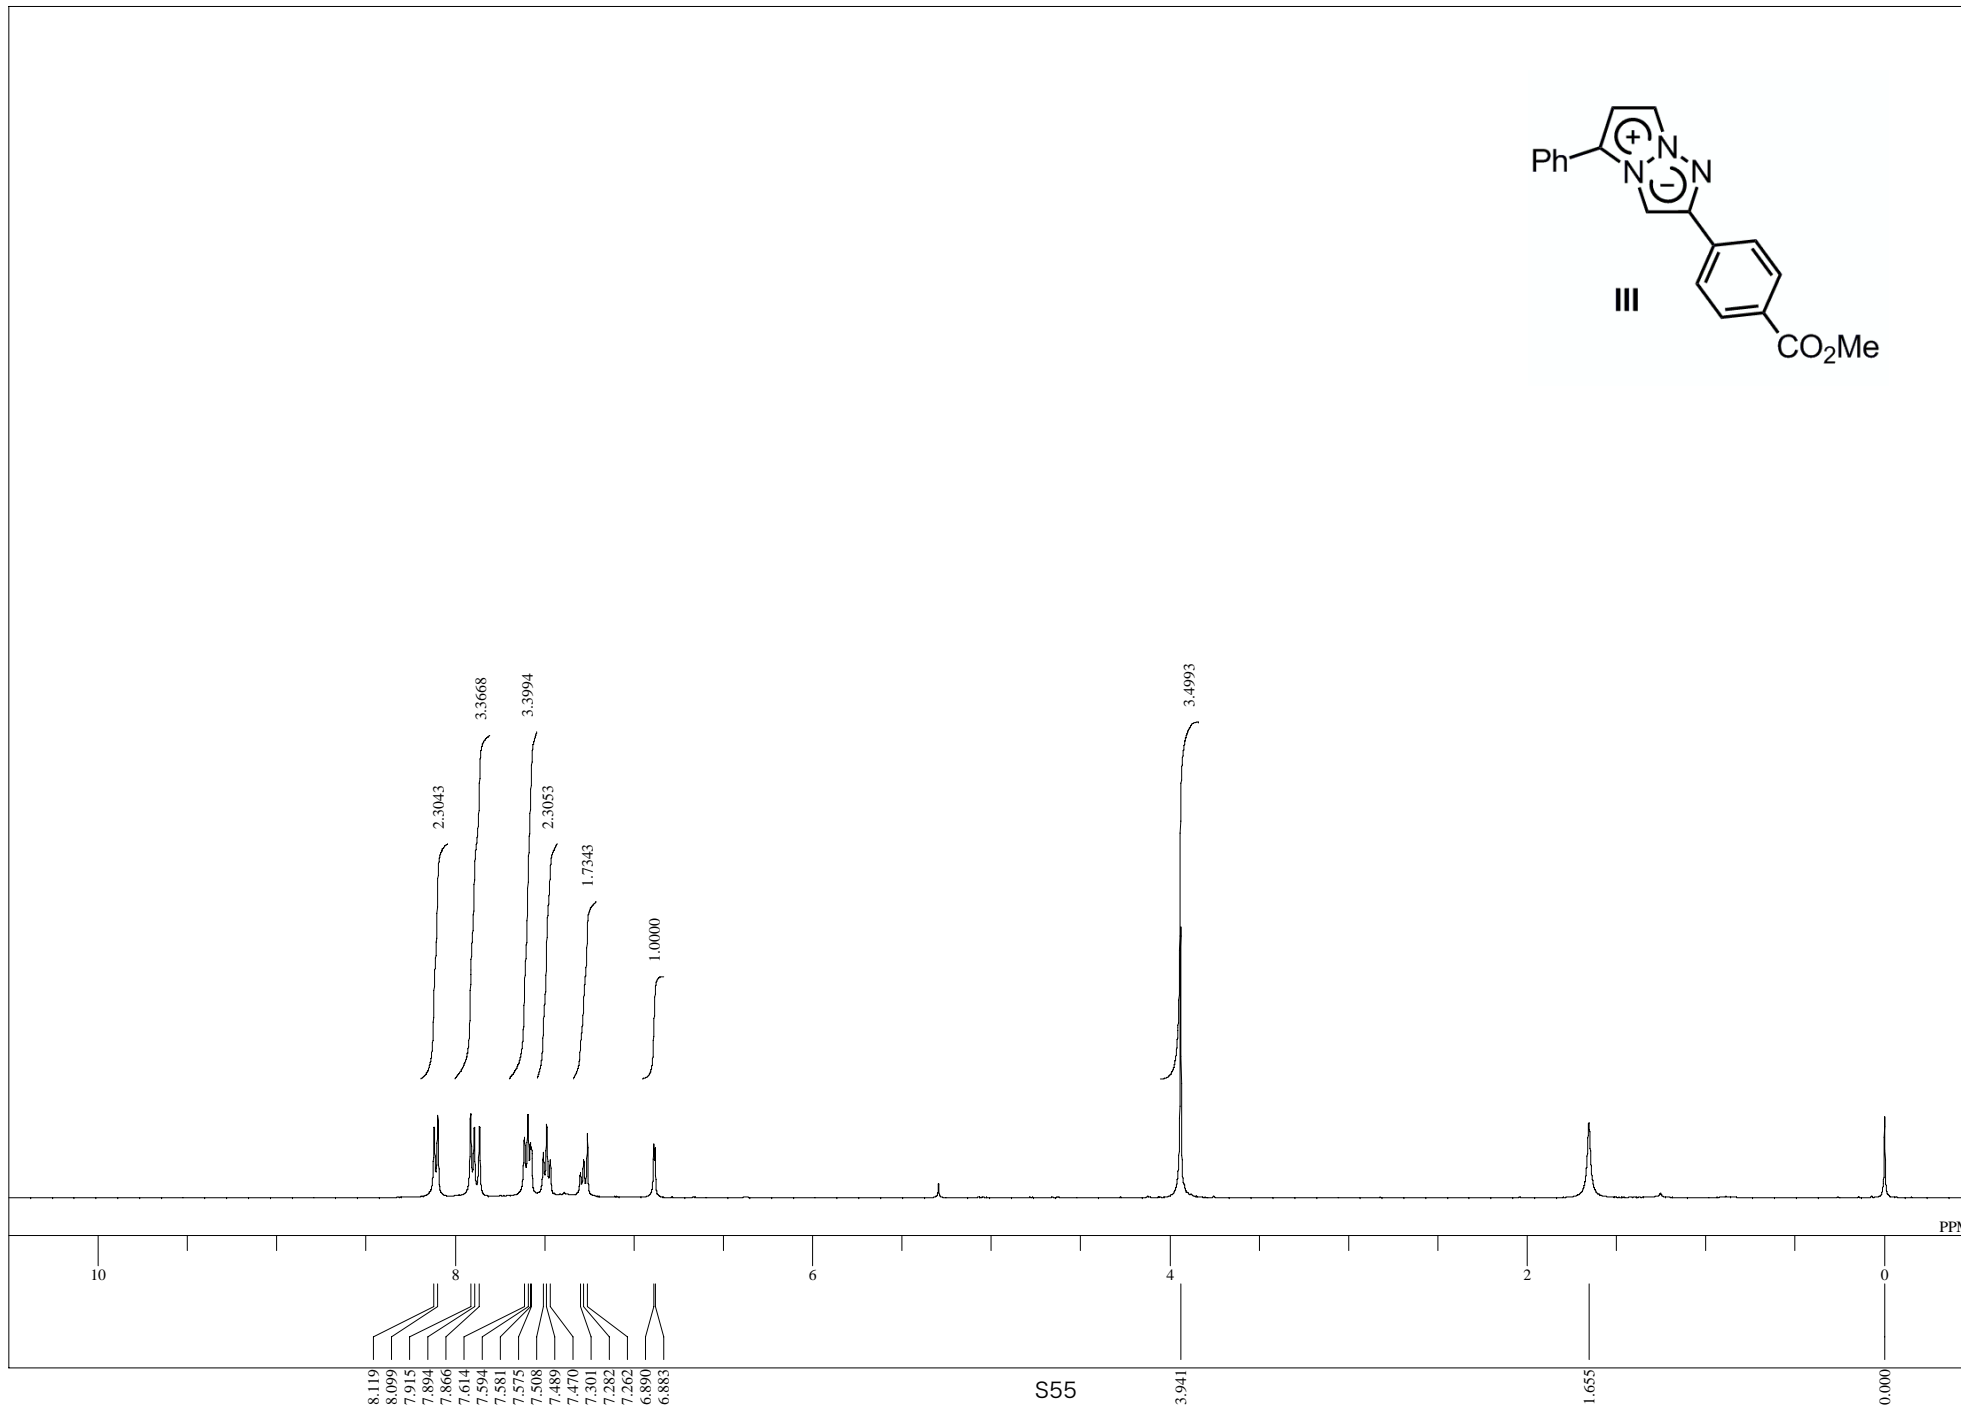

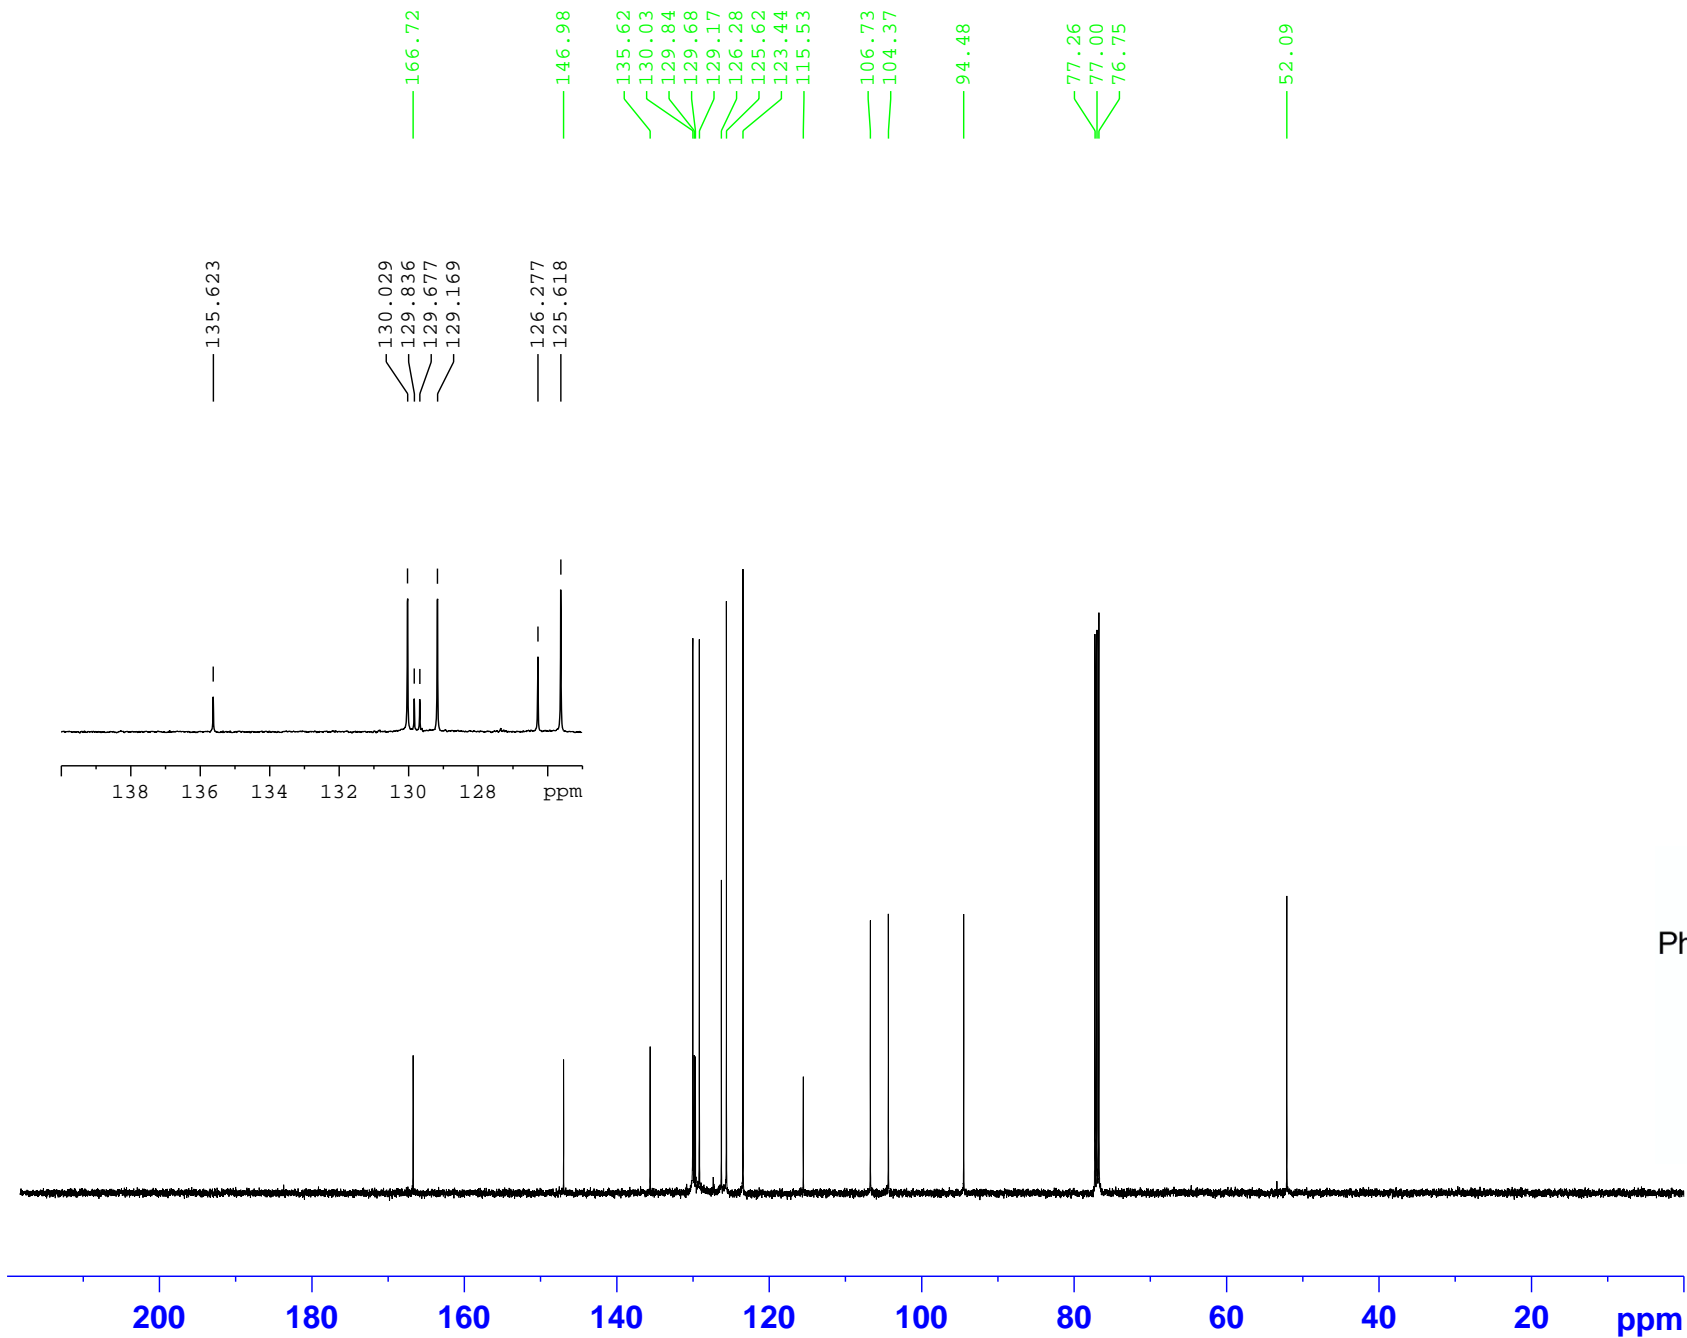

Current Data Parameters  
 NAME osawa-1311-13C  
 EXPNO 10  
 PROCNO 1

F2 - Acquisition Parameters  
 Date\_ 20140826  
 Time 19.30  
 INSTRUM spect  
 PROBHD 5 mm PABBO BB-  
 PULPROG zgpg30  
 TD 65536  
 SOLVENT cdcl3  
 NS 512  
 DS 4  
 SWH 29761.904 Hz  
 FIDRES 0.454131 Hz  
 AQ 1.1010548 sec  
 RG 203  
 DW 16.800 usec  
 DE 6.50 usec  
 TE 301.5 K  
 D1 2.0000000 sec  
 D11 0.0300000 sec  
 TD0 1

===== CHANNEL f1 =====  
 NUC1 13C  
 P1 11.00 usec  
 PL1 1.00 dB  
 PL1W 80.20954132 W  
 SFO1 125.7728791 MHz

===== CHANNEL f2 =====  
 CPDPRG2 waltz16  
 NUC2 1H  
 PCPD2 80.00 usec  
 PL2 1.00 dB  
 PL12 17.77 dB  
 PL13 18.00 dB  
 PL2W 19.45380783 W  
 PL12W 0.40326495 W  
 PL13W 0.38815448 W  
 SFO2 500.1420006 MHz

F2 - Processing parameters  
 SI 32768  
 SF 125.7603104 MHz  
 WDW EM  
 SSB 0  
 LB 1.00 Hz  
 GB 0  
 PC 1.40

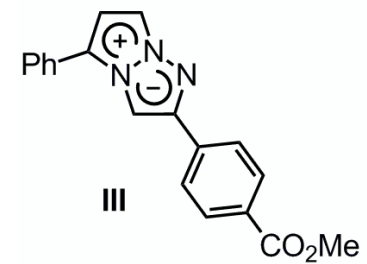



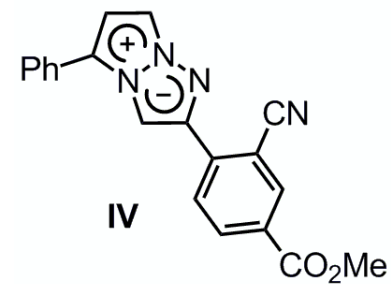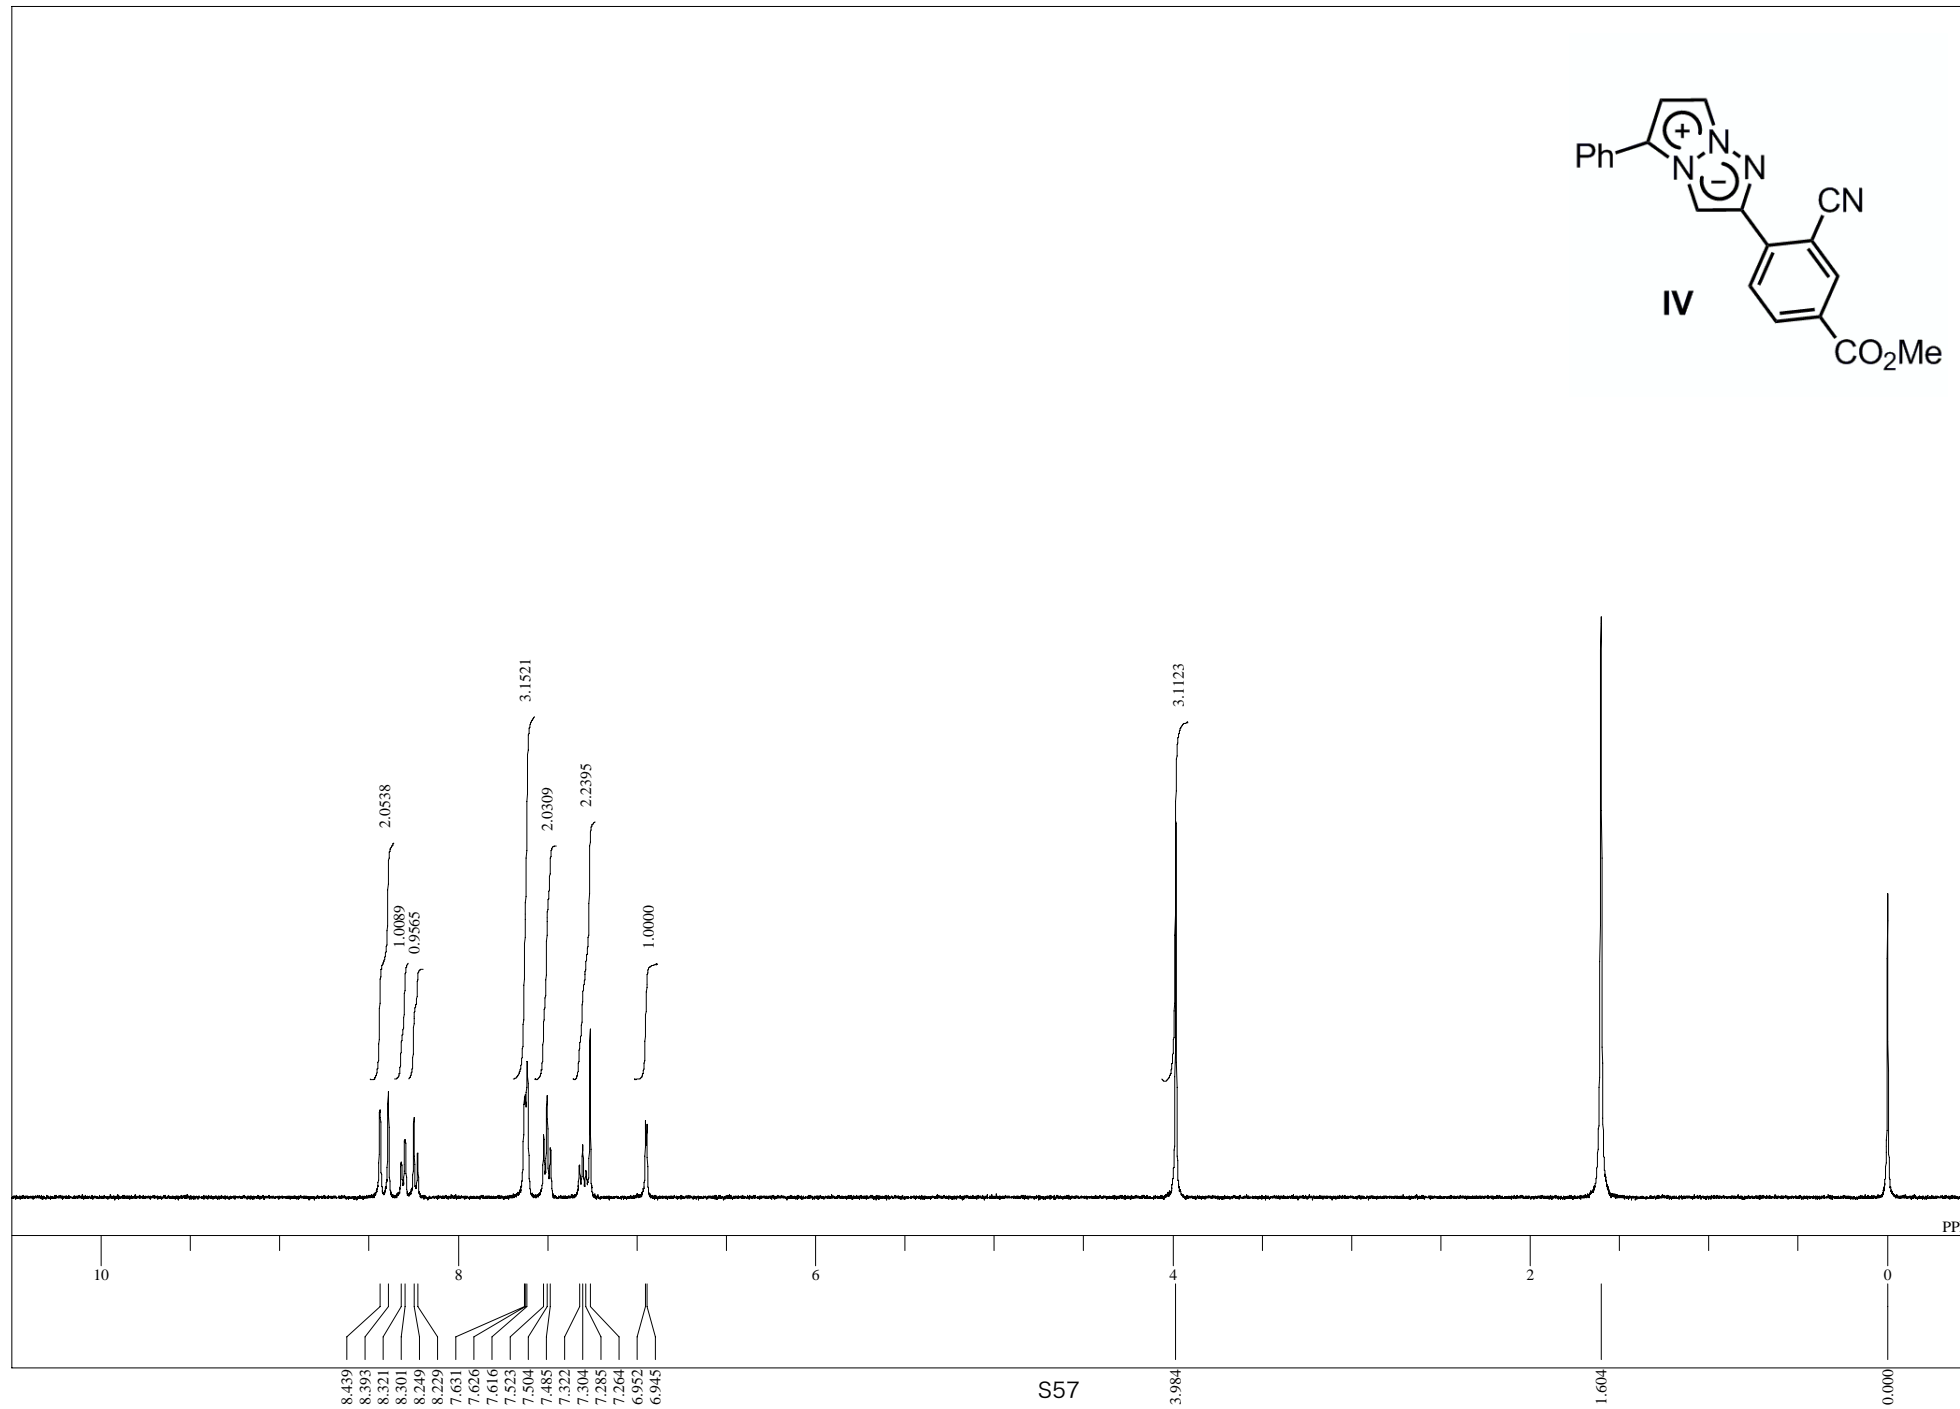

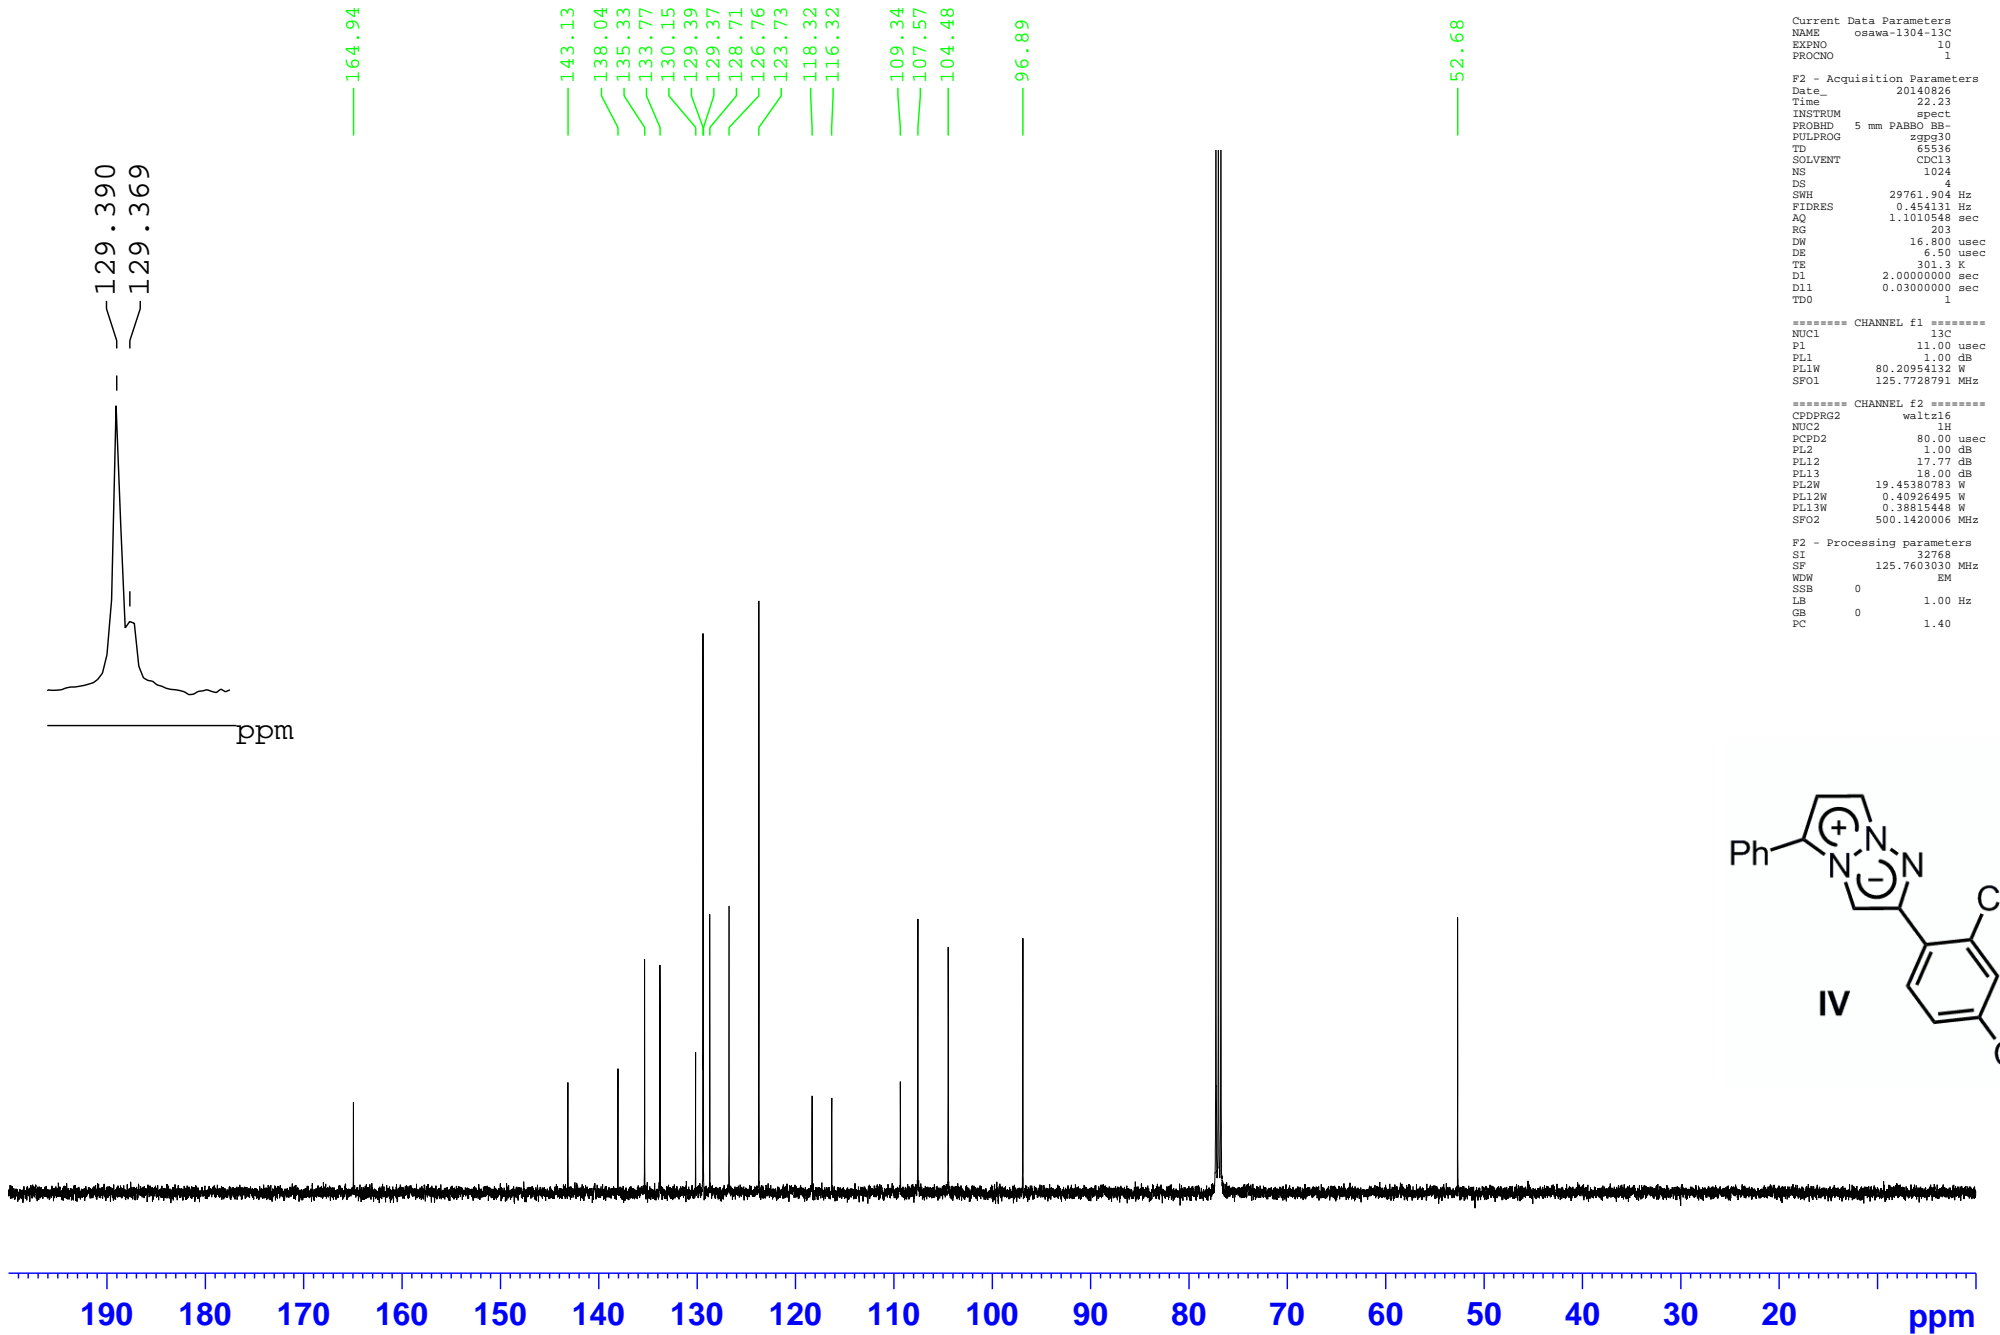

```

Current Data Parameters
NAME      osawa-1304-13C
EXPNO    10
PROCNO   1

F2 - Acquisition Parameters
Date_    20140826
Time     22.23
INSTRUM  spect
PROBHD   5 mm PABBO BB-
PULPROG  zgpg30
TD        65536
SOLVENT  CDCl3
NS        1024
DS         4
SWH      29761.904 Hz
FIDRES   0.454131 Hz
AQ        1.1010548 sec
RG         203
DW        16.800 usec
DE         6.50 usec
TE        301.3 K
D1        2.0000000 sec
D11       0.0300000 sec
TDO       1

===== CHANNEL f1 =====
NUC1      13C
P1        11.00 usec
PL1       1.00 dB
PL1W      80.20954132 W
SFO1     125.7728791 MHz

===== CHANNEL f2 =====
CPDPRG2   waltz16
NUC2       1H
PCPD2      80.00 usec
PL2        1.00 dB
PL12       17.77 dB
PL13       18.00 dB
PL2W      19.45380783 W
PL12W     0.40926495 W
PL13W     0.38815448 W
SFO2     500.1420006 MHz

F2 - Processing parameters
SI        32768
SF        125.7603030 MHz
WDW       EM
SSB       0
LB        1.00 Hz
GB        0
PC        1.40

```

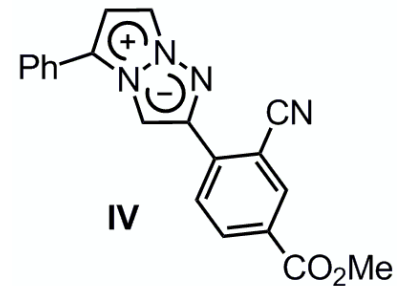

Supplement: SC-006-C4SC02780A-s001.pdf [file SC-006-C4SC02780A-s001.pdf]
